# Supplementary material for: Visible-light promoted dithioacetalization of aldehydes with thiols under aerobic and photocatalyst-free conditions
Source: Royal Society of Chemistry journal article supplement (doi:10.1039/c8gc02237b), 2018-01-01

*Supporting Information*

**Visible-Light-Promoted Dithioacetalization of Aldehydes with Thiols under aerobic and photocatalyst-free conditions**

Zhimin Xing<sup>[a]</sup>, Mingyang Yang<sup>[a]</sup>, Haiyu Sun<sup>[a]</sup>, Zemin Wang<sup>[a]</sup>, Peng Chen<sup>[a]</sup>, Lin Liu<sup>[a]</sup>, Xiaolei Wang<sup>\*[a]</sup>, Xingang Xie<sup>\*[a]</sup> and Xuegong She<sup>[a,b]</sup>

<sup>a</sup> State Key Laboratory of Applied Organic Chemistry, Department of Chemistry, Lanzhou University, Lanzhou, 730000, People's Republic of China.

<sup>b</sup> Collaborative Innovation Center of Chemical Science and Engineering (Tianjin), Tianjin, 30071, China.

**Table of Contents**

|                                                                                  |     |
|----------------------------------------------------------------------------------|-----|
| 1. General information                                                           | S2  |
| 2. General procedure for dithioacetalization of aldehydes                        | S2  |
| 3. X-ray crystal structure                                                       | S3  |
| 4. Preliminary mechanistic studies                                               | S3  |
| 4.1 TEMPO trapping experiment                                                    | S3  |
| 4.2 The model reaction was carried out in the absence of light irradiation       | S3  |
| 4.3 The model reaction was carried out under N <sub>2</sub>                      | S3  |
| 4.4 The addition of Na <sub>2</sub> CO <sub>3</sub> in the model reaction system | S4  |
| 5. Procedure for scale-up experiments                                            | S4  |
| 6. UV-Vis experiments                                                            | S5  |
| 7. EPR experiments                                                               | S6  |
| 8. Characterization data                                                         | S8  |
| 9. References                                                                    | S20 |
| 10. <sup>1</sup> H, <sup>13</sup> C, <sup>19</sup> F NMR spectra                 | S21 |

## 1. General information

Solvents were purified and dried by standard methods prior to use. All commercially available reagents were used without further purification unless otherwise noted. Column chromatography was generally performed on silica gel (200-300 mesh) and reactions were monitored by thin layer chromatography (TLC) using silica gel GF254 plates with UV light to visualize the course of reaction. Melting points were determined with a digital Koffler apparatus and were uncorrected.  $^1\text{H}$  and  $^{13}\text{C}$  NMR data were recorded on a 400 MHz spectrometer using  $\text{CDCl}_3$  as solvent at room temperature. The chemical shifts ( $\delta$ ) are reported in ppm and coupling constants ( $J$ ) in Hz. MS were measured on a HP-5988 spectrometer by direct inlet at 70 eV and High-resolution mass spectra (HRMS) were obtained on a FT-ICR spectrometer. UV-Vis spectra and EPR spectra were recorded on UV-2600, Bruker X-band A300 respectively. The 6 W blue LEDs we used in the experiments were ordinary household bulbs which are commercially available in the luminaire shops or supermarkets and its wavelength was between 460-480 nm according to our private communication with the suppliers.

## 2. General procedure for dithioacetalization of aldehydes

A 10 mL a clear pyrex glass tube and was stirred with a Teflon-coated magnetic stir bar. Thiols (0.55 mmol, 1.1 eq) was added to the solution of aldehyde derivatives (0.5 mmol, 1 eq) and in MeCN (1.5 ml). Under visible-light generated from 6 W blue LEDs, the reaction mixture was stirred under air at room temperature for 24 h. After completion of the reaction, the solvent was removed under reduced pressure by rotary evaporator. Then, the residue was purified by silica gel column chromatography to give the desired product.

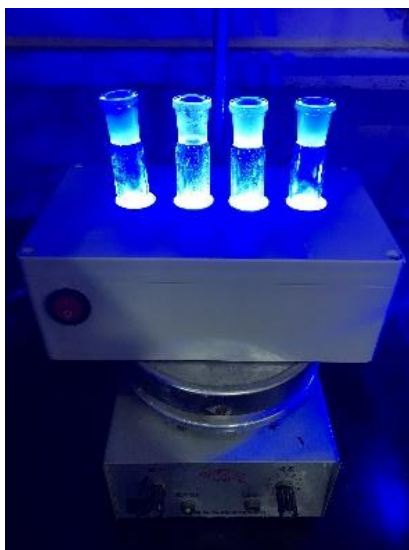

**Figure s1.** General procedure for dithioacetalization of aldehydes

### 3. X-ray crystal structure

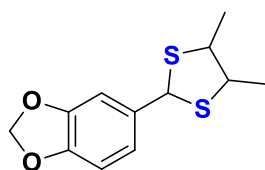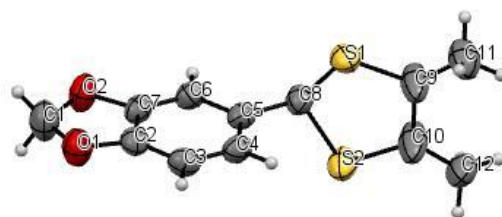

**Figure s2.** X-ray crystal structure of **7i** (CCDC 1850380)

### 4. Preliminary mechanistic studies

#### 4.1 TEMPO trapping experiment

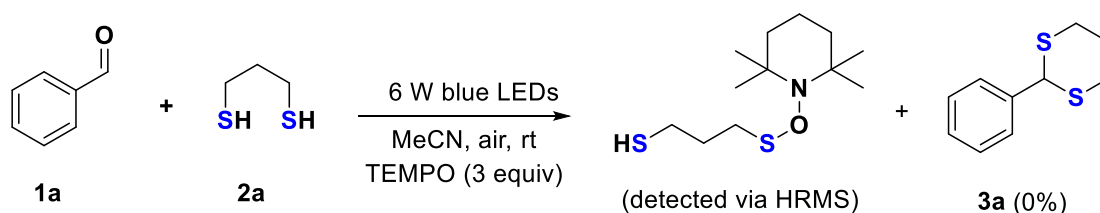

A 10 mL a clear pyrex glass tube and was stirred with a Teflon-coated magnetic stir bar. Thiols (0.55 mmol, 1.1 eq) and TEMPO (1.5 mmol, 3 eq) were added to the solution of benzaldehyde (0.5 mmol, 1 eq) and in MeCN (1.5 ml). Under visible-light generated from 6 W blue LEDs, the reaction mixture was stirred under air at room temperature for 24 h. In order to ensure whether the putative sulfur radical was trapped by TEMPO, HRMS analysis was performed from the crude reaction mixture. The mass spectrum clearly shows a peak corresponding to a coupled product between the TEMPO radical and the expected sulfur radical (HRMS (ESI): Calculated for  $C_{12}H_{25}NOS_2$   $[M + Na]^+$  : 286.1270, Found: 286.1269).

#### 4.2 The model reaction was carried out in the absence of light irradiation

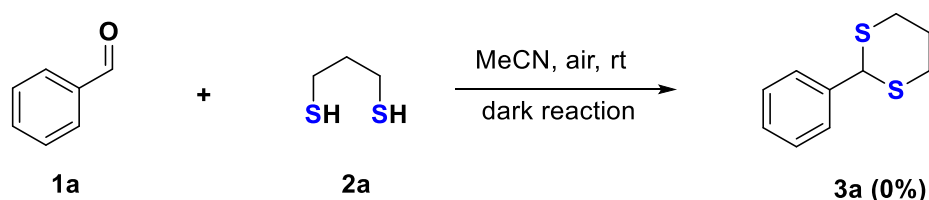

A 10 mL a clear pyrex glass tube and was stirred with a Teflon-coated magnetic stir bar. Thiols (0.55 mmol, 1.1 eq) was added to the solution of benzaldehyde (0.5 mmol, 1 eq) and in MeCN (1.5 ml). The reaction mixture was stirred under air without light irradiation at room temperature for 24 h. After completion of the reaction, the solution was concentrated in vacuum, no desired product **3a** was detected.

#### 4.3 The model reaction was carried out under $N_2$

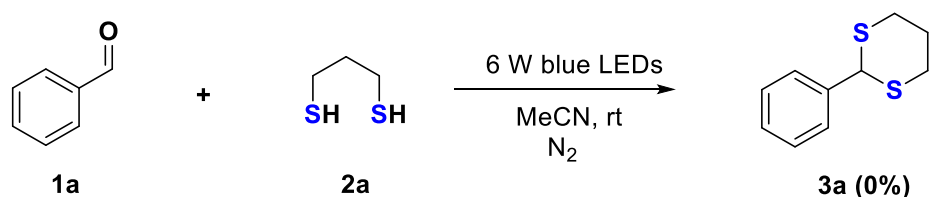

A 10 mL a clear pyrex glass tube and was stirred with a Teflon-coated magnetic stir bar. Thiols (0.55 mmol, 1.1 eq) was added to the solution of benzaldehyde (0.5 mmol, 1 eq) and in MeCN (1.5 ml). The reaction mixture was stirred under N<sub>2</sub> under the irradiation of 6 W blue LEDs at room temperature for 24 h. After completion of the reaction, the solution was concentrated in vacuum, no desired product **3a** was detected.

#### 4.4 The addition of Na<sub>2</sub>CO<sub>3</sub> in the model reaction system

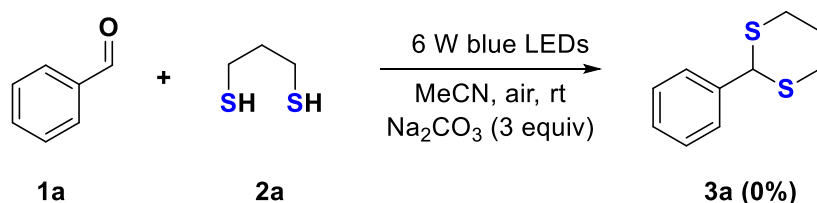

A 10 mL a clear pyrex glass tube and was stirred with a Teflon-coated magnetic stir bar. Thiols (0.55 mmol, 1.1 eq) and Na<sub>2</sub>CO<sub>3</sub> (1.5 mmol, 3 eq) were added to the solution of benzaldehyde (0.5 mmol, 1 eq) and in MeCN (1.5 ml). Under visible-light generated from 6 W blue LEDs, the reaction mixture was stirred under air at room temperature for 24 h. After completion of the reaction, the solution was concentrated in vacuum, no desired product **3a** was detected.

#### 5. Procedure for scale-up experiments

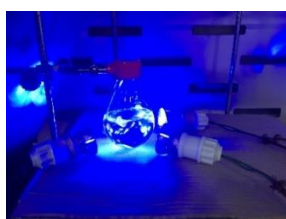

Figure s3. (At the beginning) (b)

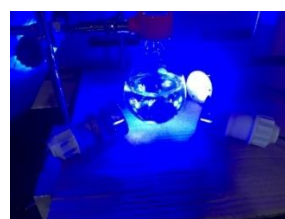

Figure s4. (At the end) (b)

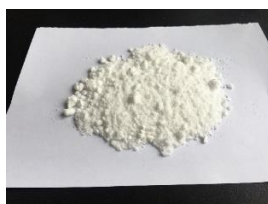

Figure s5. 2-phenyl-1,3-dithiane

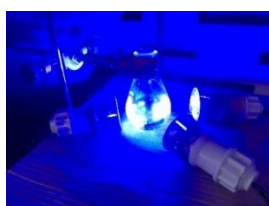

Figure s6. (neat, At the beginning) (c)

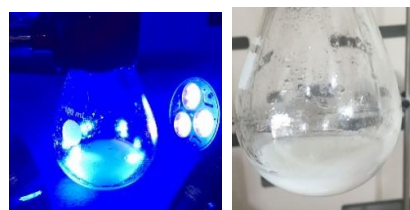

Figure s7. (neat, At the end) (c)



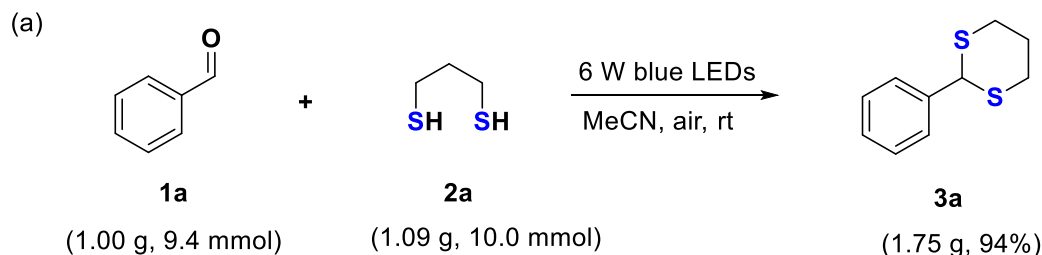

A 50 mL flame-dried flask was stirred with a Teflon-coated magnetic stir bar. Thiols (10.0 mmol, 1.1 eq) were added to the solution of benzaldehyde (9.4 mmol, 1 eq) in MeCN (30.0 ml). Under visible-light generated from 6 W blue LEDs, the reaction mixture was stirred under air at room temperature for 24 h. After completion of the reaction, the solvent was removed under reduced pressure by rotary evaporator. Then, the residue was purified by silica gel column chromatography to give the desired product.

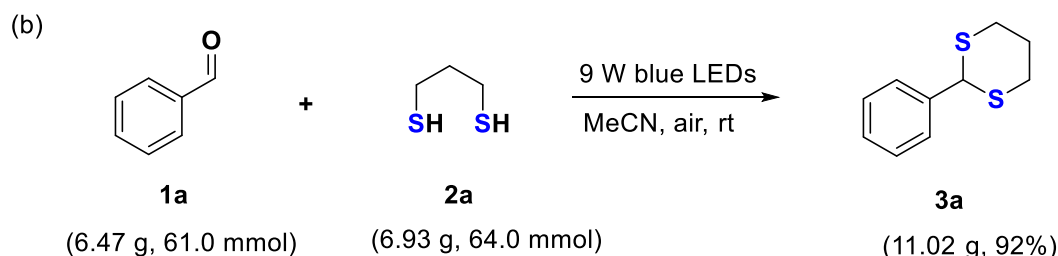

A 250 mL flame-dried flask was stirred with a Teflon-coated magnetic stir bar. Thiols (64.0 mmol, 1.05 eq) were added to the solution of benzaldehyde (61.0 mmol, 1 eq) in MeCN (180.0 ml). Under visible-light generated from 9 W blue LEDs, the reaction mixture was stirred under air at room temperature for 24 h. After completion of the reaction, the solvent was removed under reduced pressure by rotary evaporator. Then, the residue was purified by silica gel column chromatography or recrystallization from ethanol to give the desired product.

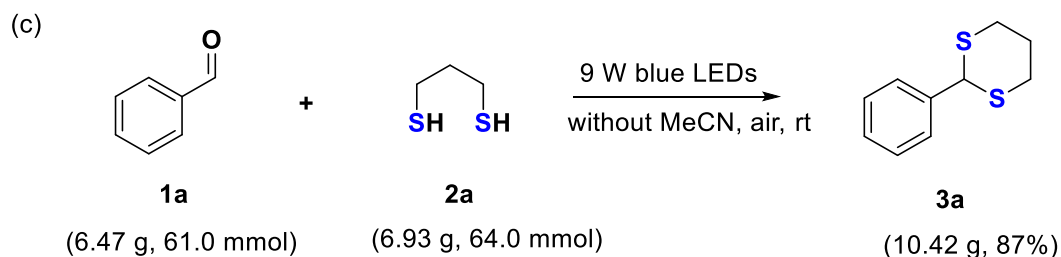

A 100 mL flame-dried flask was stirred with a Teflon-coated magnetic stir bar. Thiols (64.0 mmol, 1.05 eq) were added to benzaldehyde (61.0 mmol, 1 eq). Under visible-light generated from 9 W blue LEDs, the reaction mixture was stirred under air at room temperature for 24 h. After completion of the reaction, the solvent was removed under reduced pressure by rotary evaporator. Then, the residue was purified by silica gel column chromatography to give the desired product.

## 6. UV-Vis experiments

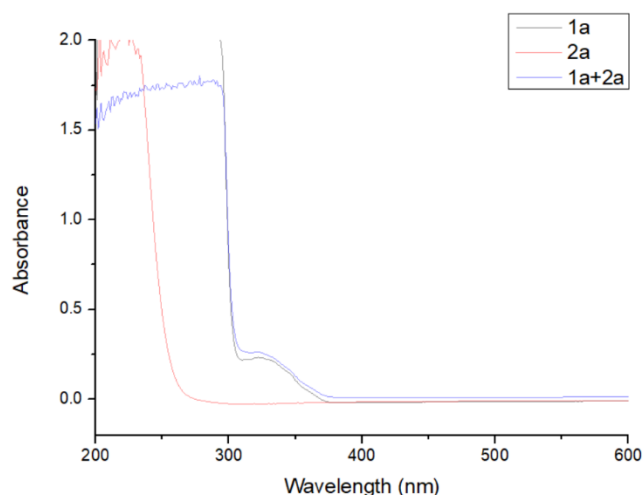

**Figure S8.** UV-Vis absorption spectra of substrates.

Although the results indicated that electron-donor acceptor (EDA) complex was not formed, our control experiment without LED lights irradiation (Table 1, entry 7) indicated that light irradiation was essential. Meanwhile, we found that the temperature of the reaction system was maintained between 25–30 °C during the course of LED lights irradiation. And we also performed the reaction without LED lights irradiation (in the dark) at 40 °C and the yield of the corresponding condensation product **3a** decreased to 14% (Scheme S1). The above two experiments indicated that LED light irradiation promoted this reaction by accelerating the generation of the sulphur radical under our standard conditions.

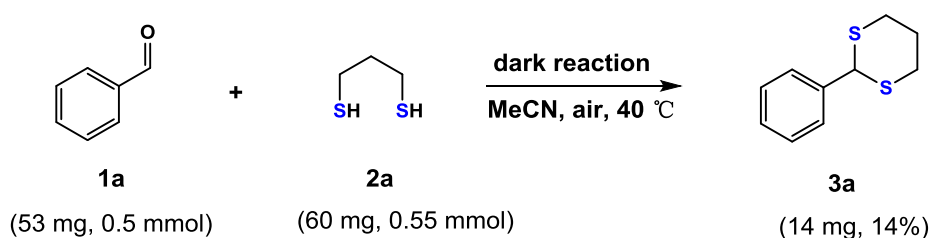

**Scheme S1.** Control heat experiment.

## 7. EPR experiments

b) EPR spectra of **1a** and **2a**, without irradiation

**1a** (0.5 mmol) and **2a** (0.55 mmol) in MeCN (1.5 mL) under air without irradiation at room temperature for few minutes, and then few of this solution was taken out by a capillary tube and sealed up, then analyzed by EPR at room temperature (Figure S9).

c) EPR spectra of **1a** and **2a**, with irradiation, 10 min

**1a** (0.5 mmol) and **2a** (0.55 mmol) under air in MeCN (1.5 mL) with blue LEDs irradiation at room temperature for 10 min, and then few of this solution was taken out by a capillary tube and sealed up, then analyzed by EPR at room temperature (Figure S9).

d) EPR spectra of **1a** and **2a**, with irradiation, 2h

**1a** (0.5 mmol) and **2a** (0.55 mmol) under air in MeCN (1.5 mL) with blue LEDs irradiation at room temperature for 2 h, and then few of this solution was taken out by a capillary tube and sealed up, then analyzed by EPR at room temperature (Figure S9).

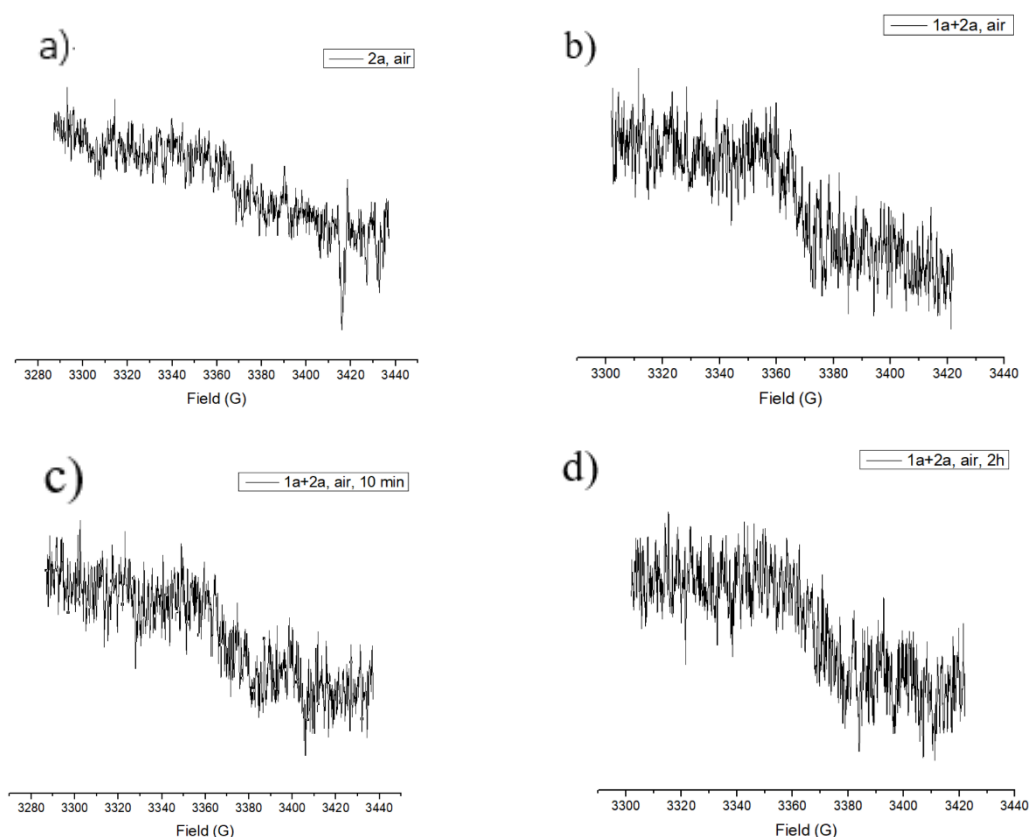

**Figure S9.** a) EPR spectra of a solution of **2a** (0.5 mmol) in MeCN (1.5 mL) under air without irradiation at room temperature. b) EPR spectra of a solution of **1a** (0.5 mmol) and **2a** (0.55 mmol) in MeCN (1.5 mL) under air without irradiation at room temperature. c) EPR spectra of a solution of **1a** (0.5 mmol) and **2a** (0.55 mmol) under air in MeCN (1.5 mL) with

blue LEDs irradiation at room temperature for 10 min. d) EPR spectra of a solution of **1a** (0.5 mmol) and **2a** (0.55 mmol) in MeCN (1.5 mL) under air with blue LEDs irradiation at room temperature for 2 h.

a) EPR spectra of **1a**, **2a** and DMPO, with irradiation

**1a** (0.2 mmol), **2a** (0.22 mmol) and DMPO (0.22 mmol) under air in MeCN (0.6 mL) with blue LEDs irradiation at room temperature for 10 min, and then few of this solution was taken out by a capillary tube and sealed up, then analyzed by EPR at room temperature (Figure 1).

b) EPR spectra of **2a** and DMPO, with irradiation

**2a** (0.22 mmol) and DMPO (0.22 mmol) under air in MeCN (0.6 mL) with blue LEDs irradiation at room temperature for 10 min, and then few of this solution was taken out by a capillary tube and sealed up, then analyzed by EPR at room temperature (Figure 1).

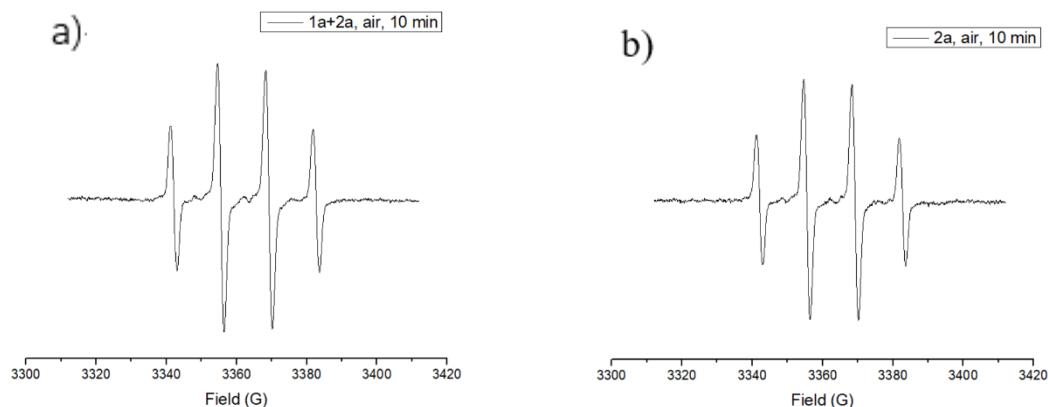

**Figure 1.** a) EPR spectra of mixture of **1a** (0.2 mmol), **2a** (0.22 mmol) and DMPO (0.22 mmol) under air in MeCN (0.6 mL) with blue LEDs irradiation at room temperature for 10 min. b) EPR spectra of a solution of **2a** (0.2 mmol) and DMPO (0.22 mmol) in MeCN (0.6 mL) under air with blue LEDs irradiation at room temperature for 10 min.

## 8. Characterization data

### 2-phenyl-1,3-dithiane (**3a**)<sup>1</sup>

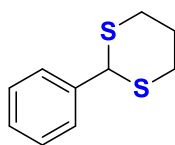

**3a**

Afforded **3a** in 98% yield as a white solid; mp 72-74 °C; <sup>1</sup>H NMR (400 MHz, CDCl<sub>3</sub>) δ 7.50 – 7.43 (m, 2H), 7.38 – 7.27 (m, 3H), 5.17 (s, 1H), 3.14 – 3.00 (m, 2H), 2.97 – 2.85 (m, 2H), 2.24 – 2.11 (m, 1H), 2.01 – 1.85 (m, 1H); <sup>13</sup>C NMR (100 MHz, CDCl<sub>3</sub>) δ 139.0, 128.7, 128.4, 127.7, 51.4, 32.1, 25.0; MS (EI, 70 ev) m/z: 196, 153, 135, 121, 105, 91.

### 2-(4-methoxyphenyl)-1,3-dithiane (3b) <sup>1</sup>

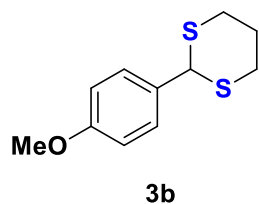

Afforded **3b** in 94% yield as a white solid; mp 118-120 °C (lit.<sup>1</sup> 115.5-116.5 °C); <sup>1</sup>H NMR (400 MHz, CDCl<sub>3</sub>) δ 7.40 (d, *J* = 8.8 Hz, 2H), 6.87 (d, *J* = 8.8 Hz, 2H), 5.14 (s, 1H), 3.79 (s, 3H), 3.10 – 2.98 (m, 2H), 2.94 – 2.85 (m, 2H), 2.22 – 2.09 (m, 1H), 2.00 – 1.82 (m, 1H); <sup>13</sup>C NMR (100 MHz, CDCl<sub>3</sub>) δ 159.5, 131.2, 128.9, 114.0, 55.2, 50.7, 32.2, 25.0; MS (EI, 70 ev) *m/z*: 226, 152, 121, 108.

### 2-(4-(methylthio)phenyl)-1,3-dithiane (3c) <sup>1</sup>

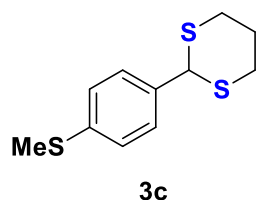

Afforded **3c** in 95% yield as a white solid; mp 90-92 °C (lit.<sup>1</sup> 93-94 °C); <sup>1</sup>H NMR (400 MHz, CDCl<sub>3</sub>) δ 7.38 (d, *J* = 8.3 Hz, 2H), 7.20 (d, *J* = 8.3 Hz, 2H), 5.13 (s, 1H), 3.12 – 2.98 (m, 2H), 2.94 – 2.84 (m, 2H), 2.46 (s, 3H), 2.22 – 2.08 (m, 1H), 1.98 – 1.82 (m, 1H); <sup>13</sup>C NMR (100 MHz, CDCl<sub>3</sub>) δ 138.8, 135.6, 128.1, 126.4, 50.8, 32.0, 24.9, 15.5; MS (EI, 70 ev) *m/z*: 242, 168, 137, 124, 109.

### 2-(4-isopropylphenyl)-1,3-dithiane (3d) <sup>1</sup>

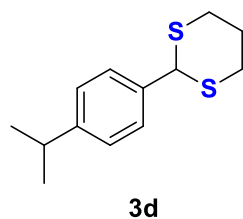

Afforded **3d** in 95% yield as a white solid; mp 57-58 °C (lit.<sup>1</sup> 58-60.4 °C); <sup>1</sup>H NMR (400 MHz, CDCl<sub>3</sub>) δ 7.38 (d, *J* = 8.1 Hz, 2H), 7.19 (d, *J* = 8.1 Hz, 2H), 5.15 (s, 1H), 3.13 – 2.98 (m, 2H), 2.95 – 2.82 (m, 3H), 2.25 – 2.10 (m, 1H), 2.02 – 1.83 (m, 1H), 1.23 (d, *J* = 6.9 Hz, 6H); <sup>13</sup>C NMR (100 MHz, CDCl<sub>3</sub>) δ 149.1, 136.4, 127.6, 126.8, 51.2, 33.8, 32.2, 25.1, 23.9; MS (EI, 70 ev) *m/z*: 238, 164, 149, 131, 105, 91.

### 5-(1,3-dithian-2-yl)benzo[d][1,3]dioxole (3e) <sup>2</sup>

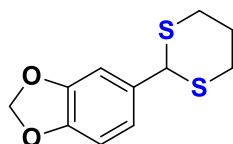

**3e**

Afforded **3e** in 92% yield as a white solid; mp 87-89 °C;  $^1\text{H}$  NMR (400 MHz,  $\text{CDCl}_3$ )  $\delta$  7.02 – 6.91 (m, 2H), 6.75 (d,  $J = 8.0$  Hz, 1H), 5.95 (s, 2H), 5.09 (s, 1H), 3.12 – 2.96 (m, 2H), 2.94 – 2.81 (m, 2H), 2.21 – 2.04 (m, 1H), 2.02 – 1.80 (m, 1H);  $^{13}\text{C}$  NMR (100 MHz,  $\text{CDCl}_3$ )  $\delta$  147.7, 147.6, 132.9, 121.2, 108.3, 101.2, 51.1, 32.1, 25.0; MS (EI, 70 ev)  $m/z$ : 240, 166, 135, 122, 107.

**2-(4-fluorophenyl)-1,3-dithiane (3f)** <sup>1</sup>

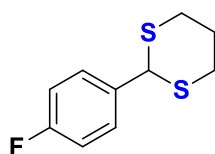

**3f**

Afforded **3f** in 93% yield as a white solid; mp 105-106 °C (lit.<sup>1</sup> 105.1-106.8 °C);  $^1\text{H}$  NMR (400 MHz,  $\text{CDCl}_3$ )  $\delta$  7.53 – 7.35 (m, 2H), 7.09 – 6.91 (m, 2H), 5.14 (s, 1H), 3.13 – 2.98 (m, 2H), 2.96 – 2.83 (m, 2H), 2.26 – 2.09 (m, 1H), 2.01 – 1.81 (m, 1H);  $^{13}\text{C}$  NMR (100 MHz,  $\text{CDCl}_3$ )  $\delta$  162.4 (d,  $J = 245.8$  Hz), 134.9 (d,  $J = 3.2$  Hz), 129.4 (d,  $J = 8.3$  Hz), 115.6 (d,  $J = 21.5$  Hz), 50.4, 32.0, 24.9;  $^{19}\text{F}$  NMR (376 MHz,  $\text{CDCl}_3$ )  $\delta$  -113.2 (s); MS (EI, 70 ev)  $m/z$ : 214, 149, 139, 105, 95.

**2-(4-chlorophenyl)-1,3-dithiane (3g)** <sup>2</sup>

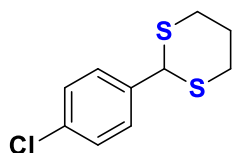

**3g**

Afforded **3g** in 94% yield as a white solid; mp 88-90 °C;  $^1\text{H}$  NMR (400 MHz,  $\text{CDCl}_3$ )  $\delta$  7.41 (d,  $J = 8.5$  Hz, 2H), 7.31 (d,  $J = 8.5$  Hz, 2H), 5.13 (s, 1H), 3.12 – 3.00 (m, 2H), 2.97 – 2.85 (m, 2H), 2.25 – 2.12 (m, 1H), 2.00 – 1.84 (m, 1H);  $^{13}\text{C}$  NMR (100 MHz,  $\text{CDCl}_3$ )  $\delta$  137.5, 134.1, 129.1, 128.9, 50.5, 32.0, 24.9; MS (EI, 70 ev)  $m/z$ : 230, 156, 105.

**2-(4-bromophenyl)-1,3-dithiane (3h)** <sup>2</sup>

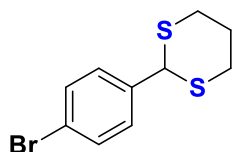

**3h**

Afforded **3h** in 98% yield as a white solid; mp 94-96 °C (lit.<sup>2</sup> 93-94 °C); <sup>1</sup>H NMR (400 MHz, CDCl<sub>3</sub>) δ 7.47 (d, J = 8.5 Hz, 2H) 7.35 (d, J = 8.4 Hz, 2H), 5.12 (s, 1H), 3.12 – 2.99 (m, 2H), 2.96 – 2.85 (m, 2H), 2.25 – 2.11 (m, 1H), 2.01 – 1.83 (m, 1H); <sup>13</sup>C NMR (100 MHz, CDCl<sub>3</sub>) δ 138.0, 131.8, 129.5, 122.3, 50.6, 31.9, 24.9; MS (EI, 70 ev) m/z: 276, 274, 202, 130, 120, 105.

**2-(4-iodophenyl)-1,3-dithiane (3i)**<sup>3</sup>

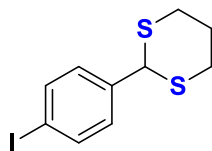

**3i**

Afforded **3i** in 65% yield as a white solid; mp 122-124 °C; <sup>1</sup>H NMR (400 MHz, CDCl<sub>3</sub>) δ 7.67 (d, J = 8.4 Hz, 2H), 7.22 (d, J = 8.4 Hz, 2H), 5.10 (s, 1H), 3.10 – 2.98 (m, 2H), 2.95 – 2.84 (m, 2H), 2.22 – 2.10 (m, 1H), 1.99 – 1.82 (m, 1H); <sup>13</sup>C NMR (100 MHz, CDCl<sub>3</sub>) δ 138.7, 137.8, 129.6, 94.0, 50.6, 31.9, 24.9; MS (EI, 70 ev) m/z: 322, 248, 130, 120, 105.

**2-(4-(trifluoromethyl)phenyl)-1,3-dithiane (3j)**<sup>4</sup>

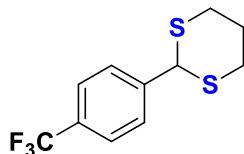

**3j**

Afforded **3j** in 91% yield as a white solid; mp 107-109 °C; <sup>1</sup>H NMR (400 MHz, CDCl<sub>3</sub>) δ 7.60 (s, 4H), 5.20 (s, 1H), 3.14 – 3.02 (m, 2H), 2.99 – 2.88 (m, 2H), 2.26 – 2.12 (m, 1H), 2.03 – 1.87 (m, 1H); <sup>13</sup>C NMR (100 MHz, CDCl<sub>3</sub>) δ 142.9, 130.5 (q, J = 32.2 Hz), 128.2, 125.7 (q, J = 3.0 Hz), 123.9 (q, J = 270.4 Hz), 50.7, 31.9, 24.9; <sup>19</sup>F NMR (376 MHz, CDCl<sub>3</sub>) δ -62.6 (s); MS (EI, 70 ev) m/z: 264, 190, 189, 159, 145, 127, 105.

**4-(1,3-dithian-2-yl)benzonitrile (3k)**<sup>2</sup>

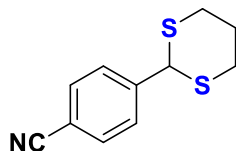

**3k**

Afforded **3k** in 74% yield as a white solid; mp 115-116 °C; <sup>1</sup>H NMR (400 MHz, CDCl<sub>3</sub>) δ 7.65 (d, J = 8.8 Hz, 2H), 7.59 (d, J = 8.4 Hz, 2H), 5.18 (s, 1H), 3.13 – 3.01 (m, 2H), 2.98 – 2.88 (m, 2H), 2.26 – 2.14 (m, 1H), 2.02 – 1.85 (m, 1H); <sup>13</sup>C NMR (100 MHz, CDCl<sub>3</sub>) δ 144.1, 132.5, 128.7, 118.5, 112.1, 50.7, 31.7, 24.8; MS (EI, 70 ev) m/z: 221, 178, 156, 146, 130, 105.

**methyl 4-(1,3-dithian-2-yl)benzoate (3l)**<sup>2</sup>

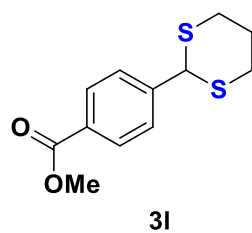

Afforded **3l** in 92% yield as a white solid; mp 138-140 °C;  $^1\text{H}$  NMR (400 MHz,  $\text{CDCl}_3$ )  $\delta$  8.01 (d,  $J = 8.3$  Hz, 2H), 7.55 (d,  $J = 8.4$  Hz, 2H), 5.20 (s, 1H), 3.90 (s, 3H), 3.12 – 3.00 (m, 2H), 2.97 – 2.87 (m, 2H), 2.23 – 2.13 (m, 1H), 2.04 – 1.84 (m, 1H);  $^{13}\text{C}$  NMR (100 MHz,  $\text{CDCl}_3$ )  $\delta$  166.5, 143.9, 130.1, 130.0, 127.9, 52.1, 51.0, 31.9, 25.0; MS (EI, 70 ev)  $m/z$ : 254, 180, 157, 149, 121, 105.

**4-(1,3-dithian-2-yl)phenol (3i)** <sup>2</sup>

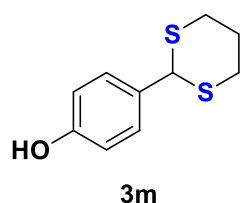

Afforded **3m** in 90% yield as a white solid; mp 158-159 °C (lit.<sup>2</sup> 116-118 °C);  $^1\text{H}$  NMR (400 MHz,  $\text{CDCl}_3$ )  $\delta$  7.33 (d,  $J = 8.5$  Hz, 2H), 6.77 (d,  $J = 8.5$  Hz, 2H), 5.12 (s, 1H), 5.09 (s, 1H), 3.14 – 2.98 (m, 2H), 2.95 – 2.82 (m, 2H), 2.24 – 2.10 (m, 1H), 2.00 – 1.81 (m, 1H);  $^{13}\text{C}$  NMR (100 MHz,  $\text{CDCl}_3$ )  $\delta$  155.5, 131.3, 129.1, 115.5, 50.7, 32.1, 25.0; MS (EI, 70 ev)  $m/z$ : 212, 138, 107.

**2-(2-methoxyphenyl)-1,3-dithiane (3n)** <sup>2</sup>

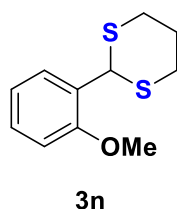

Afforded **3n** in 92% yield as a white solid; mp 128-129 °C (lit.<sup>2</sup> 127-129 °C);  $^1\text{H}$  NMR (400 MHz,  $\text{CDCl}_3$ )  $\delta$  7.58 (dd,  $J = 7.6, 1.7$  Hz, 1H), 7.29 – 7.18 (m, 1H), 6.99 – 6.91 (m, 1H), 6.85 (d,  $J = 8.3$  Hz, 1H), 5.70 (s, 1H), 3.84 (s, 3H), 3.16 – 3.01 (m, 2H), 2.94 – 2.80 (m, 2H), 2.18 – 2.06 (m, 1H), 2.00 – 1.81 (m, 1H);  $^{13}\text{C}$  NMR (100 MHz,  $\text{CDCl}_3$ )  $\delta$  155.2, 129.2, 129.0, 127.1, 120.8, 110.6, 55.6, 43.5, 32.2, 25.2; MS (EI, 70 ev)  $m/z$ : 226, 152, 119, 107, 91.

**2-(2-bromophenyl)-1,3-dithiane (3o)** <sup>5</sup>

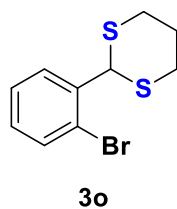



Afforded **3o** in 91% yield as a white solid; mp 97-99 °C (lit.<sup>5</sup> 98.3 °C); <sup>1</sup>H NMR (400 MHz, CDCl<sub>3</sub>) δ 7.68 (dd, *J* = 7.8, 1.7 Hz, 1H), 7.55 (dd, *J* = 8.0, 1.2 Hz, 1H), 7.32 (td, *J* = 7.6, 1.1 Hz, 1H), 7.14 (td, *J* = 7.9, 1.7 Hz, 1H), 5.60 (s, 1H), 3.19 – 3.05 (m, 2H), 2.98 – 2.82 (m, 2H), 2.27 – 2.11 (m, 1H), 2.04 – 1.84 (m, 1H); <sup>13</sup>C NMR (100 MHz, CDCl<sub>3</sub>) δ 138.2, 132.9, 129.7, 128.1, 123.0, 50.7, 32.3, 25.1; MS (EI, 70 ev) *m/z*: 276, 224, 202, 200, 121, 105.

**2-(2-bromo-5-methoxyphenyl)-1,3-dithiane (3p)**<sup>6</sup>

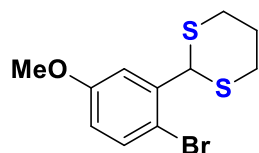

**3p**

Afforded **3p** in 85% yield as a white solid; mp 70-72 °C (lit.<sup>6</sup> 67-70 °C); <sup>1</sup>H NMR (400 MHz, CDCl<sub>3</sub>) δ 7.41 (d, *J* = 8.8 Hz, 1H), 7.22 (d, *J* = 3.0 Hz, 1H), 6.71 (dd, *J* = 8.8, 3.0 Hz, 1H), 5.54 (s, 1H), 3.79 (s, 3H), 3.21 – 3.02 (m, 2H), 2.99 – 2.84 (m, 2H), 2.25 – 2.11 (m, 1H), 2.03 – 1.80 (m, 1H); <sup>13</sup>C NMR (100 MHz, CDCl<sub>3</sub>) δ 159.4, 139.0, 133.3, 116.1, 114.8, 113.1, 55.5, 50.8, 32.2, 25.0; MS (EI, 70 ev) *m/z*: 306, 304, 232, 230, 225, 191, 151, 108.

**2-(2-bromo-4-fluorophenyl)-1,3-dithiane (3q)**

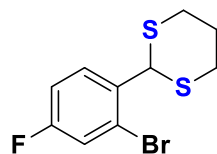

**3q**

Afforded **3q** in 77% yield as a white solid; mp 111-113 °C; <sup>1</sup>H NMR (400 MHz, CDCl<sub>3</sub>) δ 7.72 – 7.62 (m, 1H), 7.30 (dd, *J* = 8.2, 2.6 Hz, 1H), 7.11 – 7.01 (m, 1H), 5.55 (s, 1H), 3.21 – 3.06 (m, 2H), 2.99 – 2.87 (m, 2H), 2.27 – 2.13 (m, 1H), 2.03 – 1.81 (m, 1H); <sup>13</sup>C NMR (100 MHz, CDCl<sub>3</sub>) δ 161.7 (d, *J* = 250.6 Hz), 134.3 (d, *J* = 3.5 Hz), 130.8 (d, *J* = 8.6 Hz), 123.1 (d, *J* = 9.6 Hz), 120.0 (d, *J* = 24.5 Hz), 115.3 (d, *J* = 21.0 Hz), 49.7, 32.2, 24.9; <sup>19</sup>F NMR (376 MHz, CDCl<sub>3</sub>) δ -111.0 (s); MS (EI, 70 ev) *m/z*: 294, 292, 220, 218, 213, 139, 105; HRMS (ESI): *m/z* calculated for C<sub>10</sub>H<sub>10</sub>BrFS<sub>2</sub> [M + H]<sup>+</sup> : 294.9444, found: 294.9448.

**2-(2-bromo-5-fluorophenyl)-1,3-dithiane (3r)**

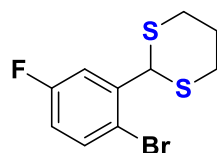

**3r**

Afforded **3r** in 63% yield as a white solid; mp 79-80 °C; <sup>1</sup>H NMR (400 MHz, CDCl<sub>3</sub>) δ 7.58 -7.38 (m, 2H), 6.98 – 6.83 (m, 1H), 5.53 (s, 1H), 3.13 (t, *J* = 13.1 Hz, 2H), 2.93 (d, *J* = 14.2 Hz, 2H), 2.19 (d, *J* = 13.9 Hz, 1H), 1.94 (q, *J* = 12.8 Hz, 1H); <sup>13</sup>C NMR (100 MHz,

CDCl<sub>3</sub>)  $\delta$  162.1 (d,  $J$  = 246.3 Hz), 140.1 (d,  $J$  = 7.7 Hz), 134.0 (d,  $J$  = 7.9 Hz), 117.1 (d,  $J$  = 1.9 Hz), 117.0 (d,  $J$  = 3.3 Hz), 116.9 (d,  $J$  = 3.8 Hz), 50.3, 32.1, 24.9; <sup>19</sup>F NMR (376 MHz, CDCl<sub>3</sub>)  $\delta$  -113.1 (s); MS (EI, 70 ev)  $m/z$ : 294, 292, 220, 218, 213, 139, 105; HRMS (ESI):  $m/z$  calculated for C<sub>10</sub>H<sub>10</sub>BrFS<sub>2</sub> [M + H]<sup>+</sup> : 294.9444, found: 294.9443.

### 2-(1,3-dithian-2-yl)phenol (**3s**)<sup>7</sup>

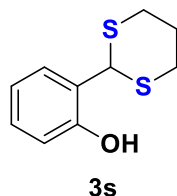

Afforded **3s** in 93% yield as a white solid; mp 135-138 °C (lit.<sup>7</sup> 131-133 °C); <sup>1</sup>H NMR (400 MHz, CDCl<sub>3</sub>)  $\delta$  7.29 (dd,  $J$  = 7.9, 1.6 Hz, 1H), 7.24 – 7.17 (m, 1H), 6.94 – 6.82 (m, 2H), 6.39 (s, 1H), 5.41 (s, 1H), 3.15 – 3.01 (m, 2H), 2.98 – 2.87 (m, 2H), 2.25 – 2.14 (m, 1H), 2.01 – 1.85 (m, 1H); <sup>13</sup>C NMR (100 MHz, CDCl<sub>3</sub>)  $\delta$  154.4, 130.1, 129.1, 123.5, 120.8, 117.3, 47.3, 31.6, 24.8; MS (EI, 70 ev)  $m/z$ : 212, 147, 138, 105.

### 3-(1,3-dithian-2-yl)phenol (**3t**)<sup>8</sup>

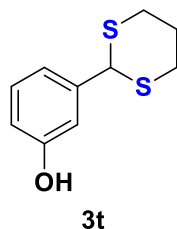

Afforded **3t** in 92% yield as a white solid; mp 124-126 °C (lit.<sup>8a</sup> 126 °C); <sup>1</sup>H NMR (400 MHz, CDCl<sub>3</sub>)  $\delta$  7.20 (t,  $J$  = 7.9 Hz, 1H), 7.03 (d,  $J$  = 7.7 Hz, 1H), 6.96 (s, 1H), 6.77 (dd,  $J$  = 8.1, 2.2 Hz, 1H), 5.33 (s, 1H), 5.12 (s, 1H), 3.13 – 2.99 (m, 2H), 2.97 – 2.86 (m, 2H), 2.24 – 2.10 (m, 1H), 2.04 – 1.76 (m, 1H); <sup>13</sup>C NMR (100 MHz, CDCl<sub>3</sub>)  $\delta$  155.6, 140.5, 130.0, 120.1, 115.6, 114.7, 51.1, 32.0, 25.0; MS (EI, 70 ev)  $m/z$ : 212, 147, 138, 105.

### 3-bromo-2-(1,3-dithian-2-yl)furan (**3u**)

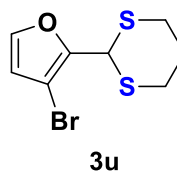

Afforded **3u** in 76% yield as a white solid; mp 81-82 °C; <sup>1</sup>H NMR (400 MHz, CDCl<sub>3</sub>)  $\delta$  7.38 (s, 1H), 6.42 (s, 1H), 5.33 (s, 1H), 3.18 – 2.92 (m, 4H), 2.24 – 1.94 (m, 2H); <sup>13</sup>C NMR (100 MHz, CDCl<sub>3</sub>)  $\delta$  149.4, 142.8, 113.8, 96.9, 39.3, 30.4, 25.0; MS (EI, 70 ev)  $m/z$ : 266, 264, 192, 190, 185, 143, 119, 106; HRMS (ESI): Calculated for C<sub>8</sub>H<sub>9</sub>BrS<sub>3</sub> [M + H]<sup>+</sup> : 266.9330, Found: 266.9334.

### 2-(4-bromothiophen-2-yl)-1,3-dithiane (**3v**)

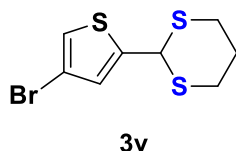

Afforded **3v** in 94% yield as a colorless oil;  $^1\text{H}$  NMR (400 MHz,  $\text{CDCl}_3$ )  $\delta$  7.19 (d,  $J$  = 1.3 Hz, 1H), 7.11 (s, 1H), 5.25 (s, 1H), 3.06 – 2.83 (m, 4H), 2.20 – 2.08 (m, 1H), 2.06 – 1.90 (m, 1H);  $^{13}\text{C}$  NMR (100 MHz,  $\text{CDCl}_3$ )  $\delta$  144.6, 129.1, 123.3, 109.1, 43.5, 29.8, 24.9; MS (EI, 70 ev)  $m/z$ : 282, 280, 217, 215, 208, 175, 154, 136, 122, 105; HRMS (ESI):  $m/z$  calculated for  $\text{C}_8\text{H}_9\text{BrOS}_2$   $[\text{M} + \text{H}]^+$ : 282.9102, found: 282.9110.

**3-(1,3-dithian-2-yl)-1H-indole (3w)** <sup>9, 8b</sup>

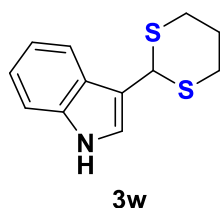

Afforded **3w** in 64% yield as a yellow solid; mp 128-129 °C (lit.<sup>9</sup> 124-126 °C);  $^1\text{H}$  NMR (400 MHz,  $\text{CDCl}_3$ )  $\delta$  8.14 (s, 1H), 7.87 (d,  $J$  = 7.8 Hz, 1H), 7.42 – 7.28 (m, 2H), 7.24 – 7.11 (m, 2H), 5.59 (s, 1H), 3.22 – 3.07 (m, 2H), 3.00 – 2.86 (m, 2H), 2.28 – 2.14 (m, 1H), 2.10 – 1.89 (m, 1H);  $^{13}\text{C}$  NMR (100 MHz,  $\text{CDCl}_3$ )  $\delta$  135.8, 125.5, 122.8, 122.5, 119.8, 119.6, 114.3, 111.3, 42.7, 32.2, 25.4; MS (EI, 70 ev)  $m/z$ : 235, 161, 130, 102.

**2-phenylethynyl-1,3-dithiane (5a)** <sup>10</sup>

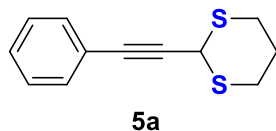

Afforded **5a** in 34% yield as a colorless oil;  $^1\text{H}$  NMR (400 MHz,  $\text{CDCl}_3$ )  $\delta$  7.53 – 7.44 (m, 2H), 7.38 – 7.29 (m, 3H), 4.80 (s, 1H), 3.41 – 3.24 (m, 2H), 2.89 – 2.78 (m, 2H), 2.19 – 2.01 (m, 2H);  $^{13}\text{C}$  NMR (100 MHz,  $\text{CDCl}_3$ )  $\delta$  131.8, 128.5, 128.2, 122.3, 85.9, 85.2, 33.3, 27.8, 25.8; MS (EI, 70 ev)  $m/z$ : 220, 192, 173, 145, 114, 102.

**2-(3-Cyclohexenyl)-1,3-dithiane (5b)** <sup>2</sup>

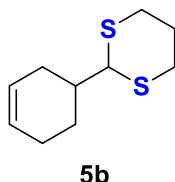

Afforded **5b** in 81% yield as a colorless oil;  $^1\text{H}$  NMR (400 MHz,  $\text{CDCl}_3$ )  $\delta$  5.74 – 5.61 (m, 2H), 4.11 (d,  $J$  = 5.8 Hz, 1H), 2.97 – 2.81 (m, 4H), 2.31 – 1.94 (m, 7H), 1.93 – 1.79 (m, 1H), 1.58 – 1.46 (m, 1H);  $^{13}\text{C}$  NMR (100 MHz,  $\text{CDCl}_3$ )  $\delta$  126.8, 125.8, 54.2, 38.8, 30.7, 30.7, 28.9, 26.4, 26.3, 25.3; MS (EI, 70 ev)  $m/z$ : 200, 119, 106, 91.

### 2-Cyclohexyl-1,3-dithiane (5c) <sup>2</sup>

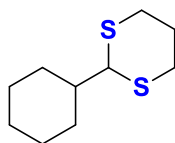

**5c**

Afforded **5c** in 94% yield as a white solid; mp 52-54 °C; <sup>1</sup>H NMR (400 MHz, CDCl<sub>3</sub>) δ 4.05 (d, *J* = 5.3 Hz, 1H), 2.96 – 2.82 (m, 4H), 2.18 – 2.06 (m, 1H), 1.97 – 1.57 (m, 7H), 1.33 – 1.07 (m, 5H); <sup>13</sup>C NMR (100 MHz, CDCl<sub>3</sub>) δ 55.3, 43.0, 30.9, 30.3, 26.4, 26.2, 26.1; MS (EI, 70 ev) *m/z*: 202, 119, 106.

### 2-Cyclopropyl-1,3-dithiane (5d) <sup>11</sup>

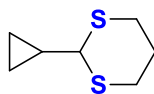

**5d**

Afforded **5d** in 84% yield as a colorless oil; <sup>1</sup>H NMR (400 MHz, CDCl<sub>3</sub>) δ 3.40 (d, *J* = 9.9 Hz, 1H), 2.92 – 2.76 (m, 4H), 2.19 – 2.05 (m, 1H), 1.95 – 1.76 (m, 1H), 1.13 – 0.96 (m, 1H), 0.75 – 0.62 (m, 2H), 0.51 – 0.40 (m, 2H); <sup>13</sup>C NMR (100 MHz, CDCl<sub>3</sub>) δ 52.2, 30.6, 25.8, 15.8, 5.7; MS (EI, 70 ev) *m/z*: 160, 119, 106, 85.

### 2-(2-Phenylethyl)-1,3-dithiane (5e) <sup>2</sup>

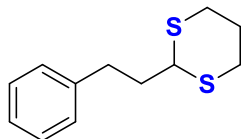

**5e**

Afforded **5e** in 94% yield as a colorless oil; <sup>1</sup>H NMR (400 MHz, CDCl<sub>3</sub>) δ 7.33 – 7.26 (m, 2H), 7.24 – 7.16 (m, 3H), 3.99 (t, *J* = 7.0 Hz, 1H), 2.87 – 2.79 (m, 6H), 2.16 – 2.03 (m, 3H), 1.95 – 1.79 (m, 1H); <sup>13</sup>C NMR (100 MHz, CDCl<sub>3</sub>) δ 140.8, 128.4, 128.3, 126.0, 46.4, 36.8, 32.4, 30.1, 25.9; MS (EI, 70 ev) *m/z*: 224, 133, 119, 106, 91.

### 2-hexyl-1,3-dithiane (5f) <sup>12</sup>

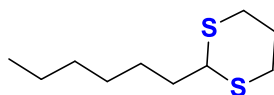

**5f**

Afforded **5f** in 94% yield as a colorless oil; <sup>1</sup>H NMR (400 MHz, CDCl<sub>3</sub>) δ 4.05 (t, *J* = 6.9 Hz, 1H), 2.97 – 2.73 (m, 4H), 2.21 – 2.05 (m, 1H), 1.96 – 1.80 (m, 1H), 1.79 – 1.68 (m, 2H), 1.58 – 1.44 (m, 2H), 1.37 – 1.21 (m, 6H), 0.88 (t, *J* = 6.6 Hz, 3H); <sup>13</sup>C NMR (100 MHz, CDCl<sub>3</sub>) δ 47.6, 35.4, 31.5, 30.4, 28.8, 26.5, 26.0, 22.5, 14.0; MS (EI, 70 ev) *m/z*: 204, 119, 106.

**2-isopropyl-1,3-dithiane (5g)** <sup>8b</sup>

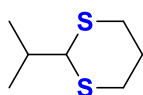

**5g**

Afforded **5g** in 67% yield as a colorless oil; <sup>1</sup>H NMR (400 MHz, CDCl<sub>3</sub>) δ 4.04 (d, *J* = 5.1 Hz, 1H), 2.96 – 2.79 (m, 4H), 2.21 – 1.95 (m, 2H), 1.94 – 1.75 (m, 1H), 1.10 (d, *J* = 6.8 Hz, 6H); <sup>13</sup>C NMR (100 MHz, CDCl<sub>3</sub>) δ 56.2, 33.5, 30.7, 26.2, 19.9; MS (EI, 70 ev) *m/z*: 162, 147, 119, 106.

**2-(tert-butyl)-1,3-dithiane (5d)** <sup>8b</sup>

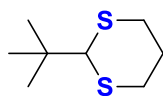

**5h**

Afforded **5h** in 63% yield as a white solid; mp 35-37 °C; <sup>1</sup>H NMR (400 MHz, CDCl<sub>3</sub>) δ 4.00 (s, 1H), 2.93 – 2.83 (m, 4H), 2.15 – 2.01 (m, 1H), 1.91 – 1.74 (m, 1H), 1.12 (s, 9H); <sup>13</sup>C NMR (100 MHz, CDCl<sub>3</sub>) δ 61.9, 61.9, 35.7, 31.2, 27.8, 25.9; MS (EI, 70 ev) *m/z*: 176, 119, 106.

**1,5-Dithia-spiro[5.5]undecane (5i)** <sup>2</sup>

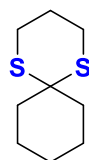

**5i**

Afforded **5i** in 89% yield as a white solid; mp 36-38 °C (lit.<sup>2</sup> 39-41 °C); <sup>1</sup>H NMR (400 MHz, CDCl<sub>3</sub>) δ 2.88 – 2.75 (m, 4H), 2.05 – 1.91 (m, 6H), 1.71 – 1.58 (m, 4H), 1.55 – 1.39 (m, 2H); <sup>13</sup>C NMR (100 MHz, CDCl<sub>3</sub>) δ 50.3, 37.8, 26.1, 25.8, 25.8, 21.9; MS (EI, 70 ev) *m/z*: 188, 155, 145, 114, 81.

**2-(2,3,4-trimethoxyphenyl)-1,3-dithiolane (7a)** <sup>13</sup>

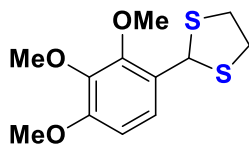

**7a**

Afforded **7a** in 82% yield as a colorless oil; <sup>1</sup>H NMR (400 MHz, CDCl<sub>3</sub>) δ 7.42 (d, *J* = 8.8 Hz, 1H), 6.67 (d, *J* = 8.8 Hz, 1H), 6.00 (s, 1H), 3.95 (s, 3H), 3.85 (d, *J* = 4.4 Hz, 6H), 3.51 – 3.41 (m, 2H), 3.38 – 3.28 (m, 2H); <sup>13</sup>C NMR (100 MHz, CDCl<sub>3</sub>) δ 153.2, 151.4, 141.7,

126.3, 122.8, 107.3, 61.4, 60.7, 56.0, 49.2, 39.7; MS (EI, 70 ev)  $m/z$ : 272, 257, 244, 213, 179, 167, 151, 121, 107.

**2-Phenyl-1,3-dithiolane (7b)**<sup>13</sup>

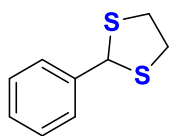

**7b**

Afforded **7b** in 84% yield as a colorless oil; <sup>1</sup>H NMR (400 MHz, CDCl<sub>3</sub>)  $\delta$  7.52 (d,  $J$  = 7.3 Hz, 2H), 7.36 – 7.20 (m, 3H), 5.63 (s, 1H), 3.54 – 3.42 (m, 2H), 3.40 – 3.27 (m, 2H); <sup>13</sup>C NMR (100 MHz, CDCl<sub>3</sub>)  $\delta$  140.2, 128.4, 127.9, 127.9, 56.2, 40.2; MS (EI, 70 ev)  $m/z$ : 182, 153, 135, 121, 105.

**5-(1,3-dithiolan-2-yl)benzo[d][1,3]dioxole (7c)**<sup>13</sup>

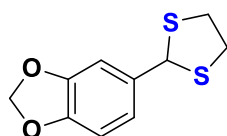

**7c**

Afforded **7c** in 62% yield as a colorless oil; <sup>1</sup>H NMR (400 MHz, CDCl<sub>3</sub>)  $\delta$  7.09 (d,  $J$  = 1.8 Hz, 1H), 6.93 (dd,  $J$  = 8.0, 1.7 Hz, 1H), 6.70 (d,  $J$  = 8.0 Hz, 1H), 5.94 (s, 2H), 5.60 (s, 1H), 3.54 – 3.43 (m, 2H), 3.38 – 3.28 (m, 2H); <sup>13</sup>C NMR (100 MHz, CDCl<sub>3</sub>)  $\delta$  147.8, 147.4, 133.9, 121.3, 108.3, 107.7, 101.2, 56.4, 40.2; MS (EI, 70 ev)  $m/z$ : 226, 197, 165, 135, 121, 107.

**2-(2,4-dichlorophenyl)-1,3-dithiolane (7d)**<sup>14</sup>

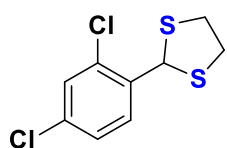

**7d**

Afforded **7d** in 94% yield as a colorless oil; <sup>1</sup>H NMR (400 MHz, CDCl<sub>3</sub>)  $\delta$  7.78 (d,  $J$  = 8.5 Hz, 1H), 7.35 (d,  $J$  = 2.1 Hz, 1H), 7.27 – 7.20 (m, 1H), 6.00 (s, 1H), 3.40 – 3.31 (m, 4H); <sup>13</sup>C NMR (100 MHz, CDCl<sub>3</sub>)  $\delta$  137.5, 133.8, 133.8, 130.1, 129.1, 127.3, 51.6, 39.7; MS (EI, 70 ev)  $m/z$ : 252, 250, 224, 222, 189, 187, 154, 146, 119, 111, 93.

**2-(4-bromothiophen-2-yl)-1,3-dithiolane (7e)**

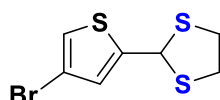

**7e**

Afforded **7e** in 76% yield as a white solid; mp 48-50 °C; <sup>1</sup>H NMR (400 MHz, CDCl<sub>3</sub>) δ 7.12 (d, *J* = 1.4 Hz, 1H), 6.98 (d, *J* = 0.5 Hz, 1H), 5.81 (s, 1H), 3.51 – 3.28 (m, 4H); <sup>13</sup>C NMR (100 MHz, CDCl<sub>3</sub>) δ 148.9, 128.0, 122.8, 109.0, 50.1, 39.8; MS (EI, 70 ev) *m/z*: 268, 266, 240, 238, 207, 159, 141, 127, 95; HRMS (ESI): *m/z* calculated for C<sub>7</sub>H<sub>7</sub>BrS<sub>3</sub> [M + H]<sup>+</sup> : 268.8946, found: 268.8950.

**2-Phenyethyl-1,3-dithiolane (28a)** <sup>15</sup>

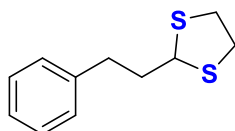

**7f**

Afforded **7f** in 87% yield as a colorless oil; <sup>1</sup>H NMR (400 MHz, CDCl<sub>3</sub>) δ 7.32 – 7.26 (m, 2H), 7.23 – 7.17 (m, 3H), 4.44 (t, *J* = 7.1 Hz, 1H), 3.34 – 3.13 (m, 4H), 2.84 – 2.72 (m, 2H), 2.20 – 2.04 (m, 2H); <sup>13</sup>C NMR (100 MHz, CDCl<sub>3</sub>) δ 140.8, 128.5, 128.4, 126.0, 52.8, 41.1, 38.4, 35.2; MS (EI, 70 ev) *m/z*: 210, 117, 105, 91.

**4,5-dimethyl-2-(2,3,4-trimethoxyphenyl)-1,3-dithiolane (7g)**

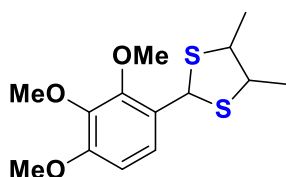

**7g**

Afforded **7g** in 84% overall yield as a colorless oil; <sup>1</sup>H NMR (400 MHz, CDCl<sub>3</sub>) δ 7.60 – 7.44 (m, 1H), 6.77 – 6.62 (m, 1H), 6.10 – 5.94 (m, 1H), 4.14 – 3.91 (m, 3H), 3.85 (s, 6H), 3.61 – 3.33 (m, 2H), 1.50 – 1.35 (m, 6H); <sup>13</sup>C NMR (100 MHz, CDCl<sub>3</sub>) δ 153.1, 153.0, 153.0, 151.6, 151.4, 151.1, 141.6, 127.8, 126.4, 124.5, 123.6, 123.1, 122.7, 107.6, 107.3, 107.1, 61.6, 61.5, 61.3, 60.7, 57.3, 55.9, 55.8, 53.6, 48.2, 46.9, 45.8, 18.1, 17.7, 17.0, 16.0; MS (EI, 70 ev) *m/z*: 300, 244, 213, 179, 151, 107.

**4,5-dimethyl-2-phenyl-1,3-dithiolane (7h)**

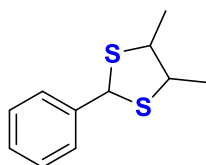

**7h**

Afforded **7h** in 87% overall yield as a colorless oil; <sup>1</sup>H NMR (400 MHz, CDCl<sub>3</sub>) δ 7.58 – 7.48 (m, 2H), 7.35 – 7.19 (m, 3H), 5.72 – 5.58 (m, 1H), 4.07 – 3.41 (m, 2H), 1.66 – 1.17 (m, 6H); <sup>13</sup>C NMR (100 MHz, CDCl<sub>3</sub>) δ 141.7, 140.4, 138.7, 128.4, 128.3, 128.0, 127.9,

127.7, 57.6, 56.6, 55.8, 54.4, 53.9, 53.2, 18.5, 18.2, 17.0, 16.0; MS (EI, 70 ev)  $m/z$ : 210, 153, 145, 121, 105.

**5-(4,5-dimethyl-1,3-dithiolan-2-yl)benzo[d][1,3]dioxole (7i)**

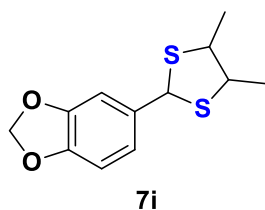

Afforded **7i** in 79% overall yield as a white solid;  $^1\text{H}$  NMR (400 MHz,  $\text{CDCl}_3$ )  $\delta$  7.19 – 7.07 (m, 1H), 6.99 – 6.84 (m, 1H), 6.69 (d,  $J$  = 8.0 Hz, 1H), 5.94 (s, 2H), 5.70 – 5.54 (m, 1H), 4.07 – 3.39 (m, 2H), 1.68 – 1.16 (m, 6H);  $^{13}\text{C}$  NMR (100 MHz,  $\text{CDCl}_3$ )  $\delta$  147.8, 147.4, 134.1, 121.7, 121.4, 108.5, 107.7, 101.2, 66.8, 58.3, 57.6, 56.6, 53.9, 53.3, 18.5, 18.2, 17.0; MS (EI, 70 ev)  $m/z$ : 254, 198, 165, 135, 121, 107; HRMS (ESI):  $m/z$  calculated for  $\text{C}_8\text{H}_9\text{BrOS}_2$   $[\text{M} + \text{H}]^+$ : 255.0511, found: 250.0511.

**4,5-dimethyl-2-phenethyl-1,3-dithiolane (7j)**

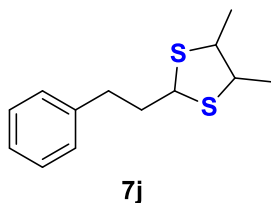

Afforded **7j** in 90% overall yield as a colorless oil;  $^1\text{H}$  NMR (400 MHz,  $\text{CDCl}_3$ )  $\delta$  7.33 – 7.06 (m, 5H), 4.51 – 4.29 (m, 1H), 3.80 – 3.22 (m, 2H), 2.82 – 2.64 (m, 2H), 2.24 – 2.00 (m, 2H), 1.53 – 1.14 (m, 6H);  $^{13}\text{C}$  NMR (100 MHz,  $\text{CDCl}_3$ )  $\delta$  140.8, 140.8, 140.7, 128.4, 128.4, 128.3, 128.3, 125.9, 125.9, 125.8, 56.2, 54.2, 52.5, 52.1, 52.0, 50.7, 49.5, 41.9, 41.4, 40.3, 35.4, 35.0, 34.8, 18.3, 17.6, 16.8, 16.0; MS (EI, 70 ev)  $m/z$ : 238, 133, 117, 105, 91.

**2-hexyl-4,5-dimethyl-1,3-dithiolane (7k)**

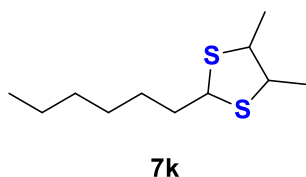

Afforded **7k** in 69% overall yield as a colorless oil;  $^1\text{H}$  NMR (400 MHz,  $\text{CDCl}_3$ )  $\delta$  4.58 – 4.33 (m, 1H), 3.84 – 3.20 (m, 2H), 1.92 – 1.74 (m, 2H), 1.51 – 1.19 (m, 14H), 0.88 (t,  $J$  = 6.7 Hz, 3H);  $^{13}\text{C}$  NMR (101 MHz,  $\text{CDCl}_3$ )  $\delta$  56.1, 54.3, 53.1, 52.3, 52.1, 51.6, 50.5, 40.3, 39.7, 38.6, 31.6, 31.6, 31.6, 29.5, 29.1, 28.9, 28.8, 28.8, 22.5, 18.4, 17.8, 16.9, 16.0, 14.0; MS (EI, 70 ev)  $m/z$ : 218, 133, 97.

**7. References**



- 1 B. Karimi and M. Vafaezadeh, *RSC Adv.*, 2013, **3**, 23207.
- 2 K. Inamoto, T. Yamada, S.-i. Kato, S. Kikkawa and Y. Kondo, *Tetrahedron*, 2013, **69**, 9192.
- 3 S. C. Tang, J. S. Lan, W. B. Du and L. X. Tian, CN 105085471, 2015.
- 4 L. Liu, G. h. Wang, J. Jiao and P. f. Li, *Org. Lett.*, 2017, **19**, 6132.
- 5 V. H. G. Rohde, P. Pommerening, H. F. T. Klare and M. Oestreich, *Organometallics*, 2014, **33**, 3618.
- 6 R. S. Paley, J. M. Liu, B. R. Lichtenstein, V. L. Knoedler, T. T. Sanan, D. J. Adams, J. Fernández, and P. R. Rablen, *Org. Lett.*, 2003, **5**, 309.
- 7 B. Roy, D. Sengupta and B. Basu, *Tetrahedron Letters.*, 2014, **55**, 6596.
- 8 (a) J. P. Fernandez, Y. Robbe,; J. P. Chapat, G. Caruana, M. Fatome and H. Sentenac-Roumanou, *Eur. J. Med. Chem.*, 1984, **19**, 461; (b) J. S. Lan, W. B. Du, L. X. Tian, C. G. Zhao, X. G. She and S. C. Tang, *Org. Lett.*, 2014, **16**, 4396.
- 9 P. Stütz and P. A. Stadler, *Helv. Chim. Acta*, 1972, **55**, 75.
- 10 C.-T. Chen, Y.-D. Lin and C.-Y. Liu, *Tetrahedron*, 2009, **65**, 10470.
- 11 J. Claydena, D. W. Watsona and M. Chambers, *Tetrahedron*, 2005, **61**, 3195.
- 12 C.-J. Yu, R. Li and P. M. Gu, *Tetrahedron Letters.*, 2016, **57**, 3568.
- 13 H. R. Shaterian, K. Azizi and N. Fahimi, *J. Sulfur. Chem.*, 2011, **32**, 85.
- 14 S. A. Pourmousavi and M. Hadavandkhani, *J. Sulfur. Chem.*, 2009, **30**, 37.
- 15 N. Sakai, T. Miyazaki, T. Sakamoto, T. Yatsuda, T. Moriya, R. Ikeda, and T. Konakahara, *Org. Lett.*, 2012, **14**, 4366.

## 8. <sup>1</sup>H, <sup>13</sup>C, <sup>19</sup>F NMR spectra

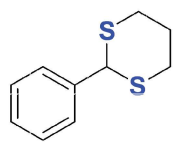

3a

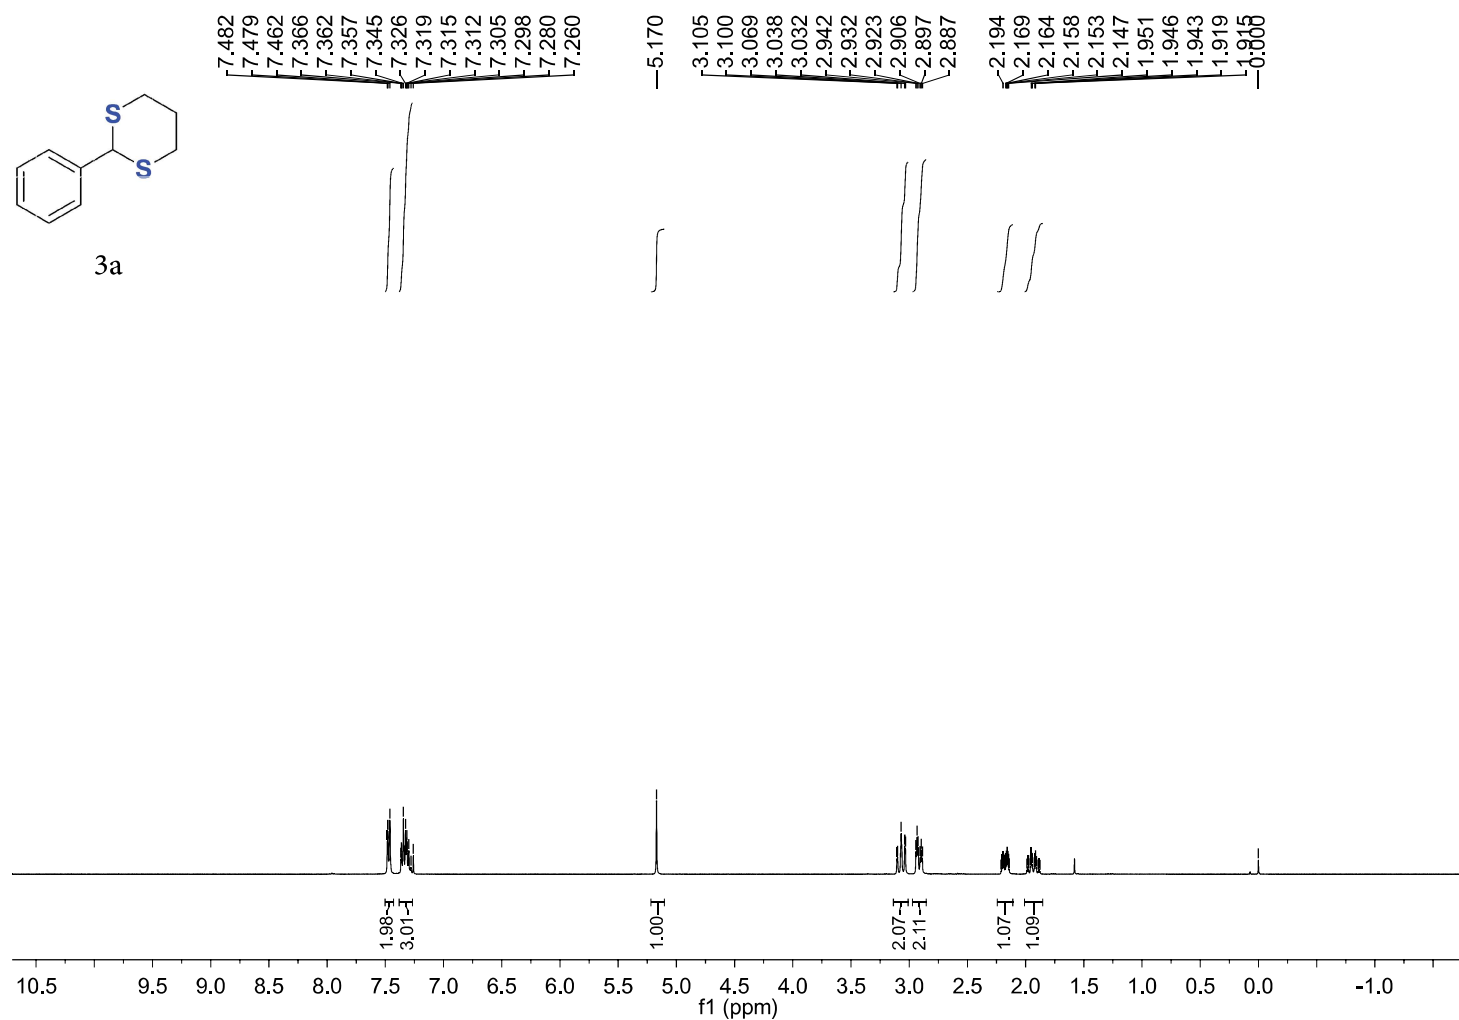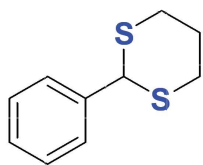

3a

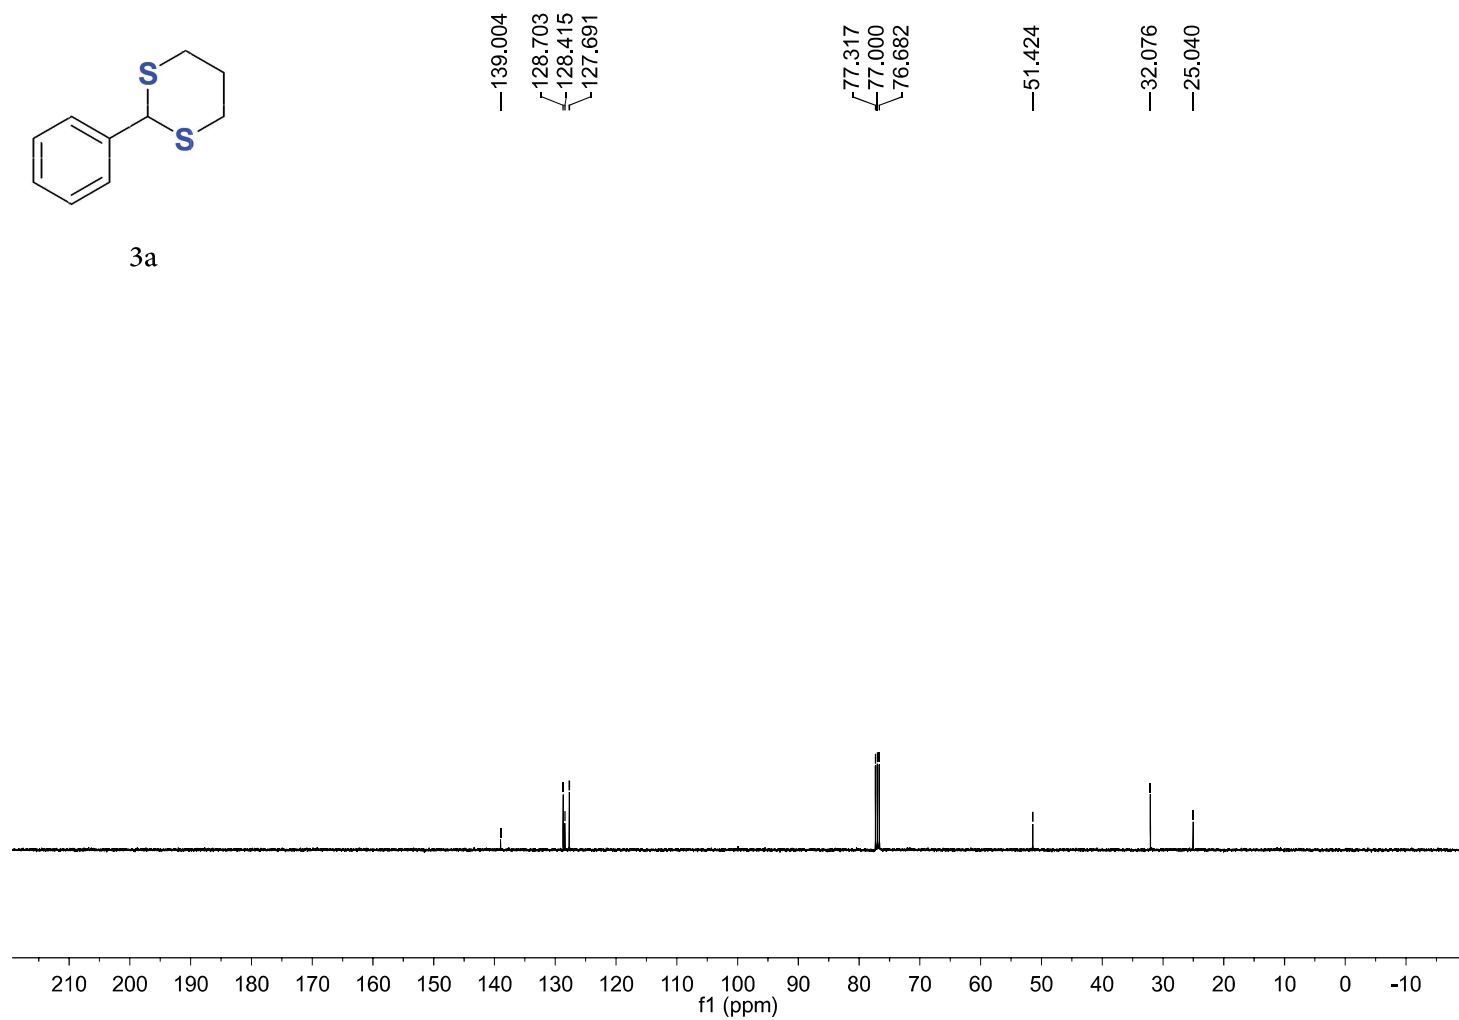

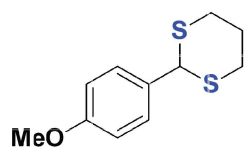

3b

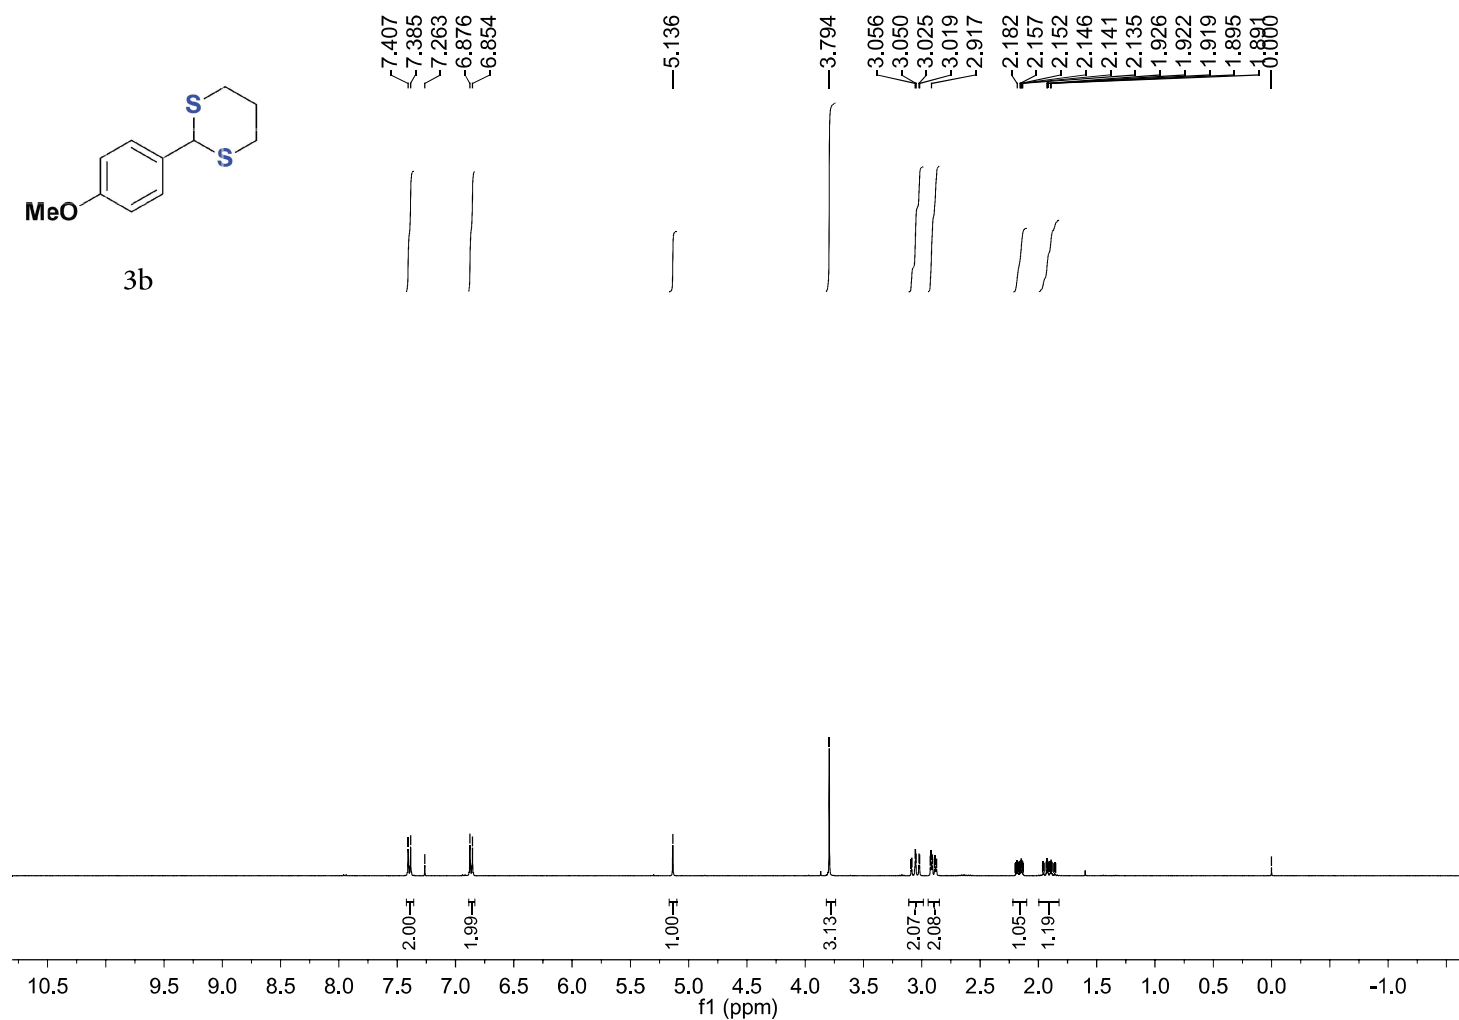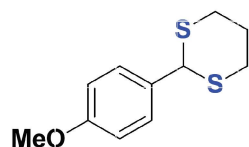

3b

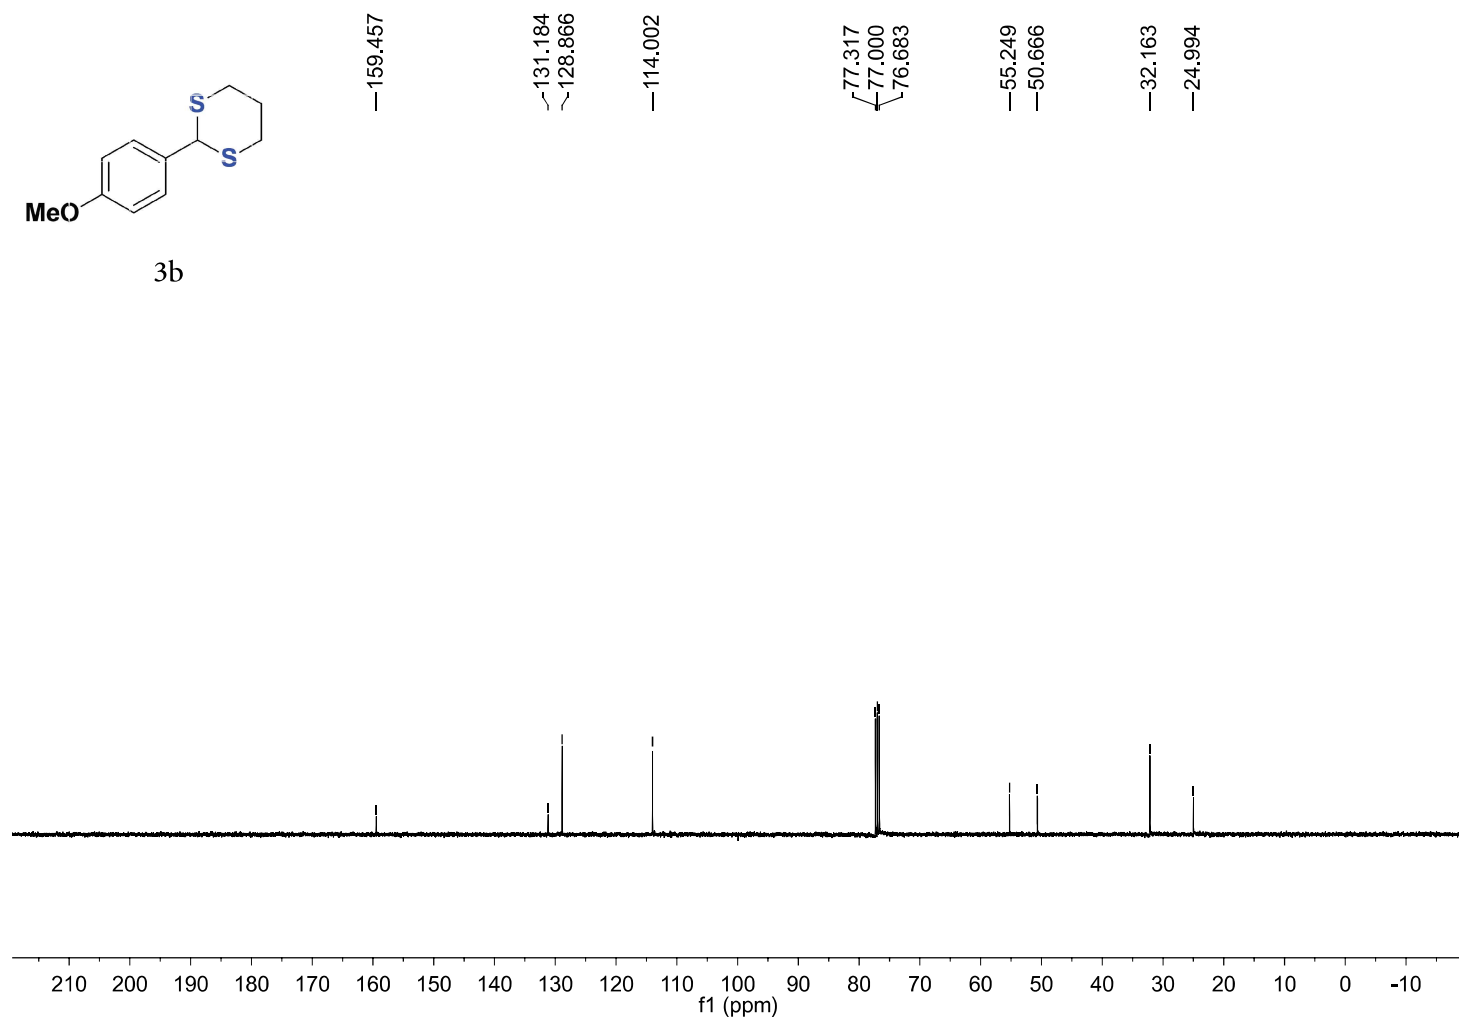

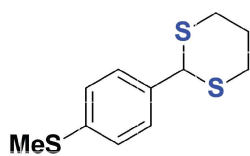

3c

7.393  
7.373  
7.260  
7.214  
7.193  
5.127  
3.075  
3.069  
3.038  
3.008  
3.002  
2.917  
2.908  
2.899  
2.881  
2.873  
2.863  
2.460  
2.174  
2.168  
2.162  
2.143  
2.139  
2.133  
2.127  
1.919  
1.915  
1.888  
1.884  
1.000

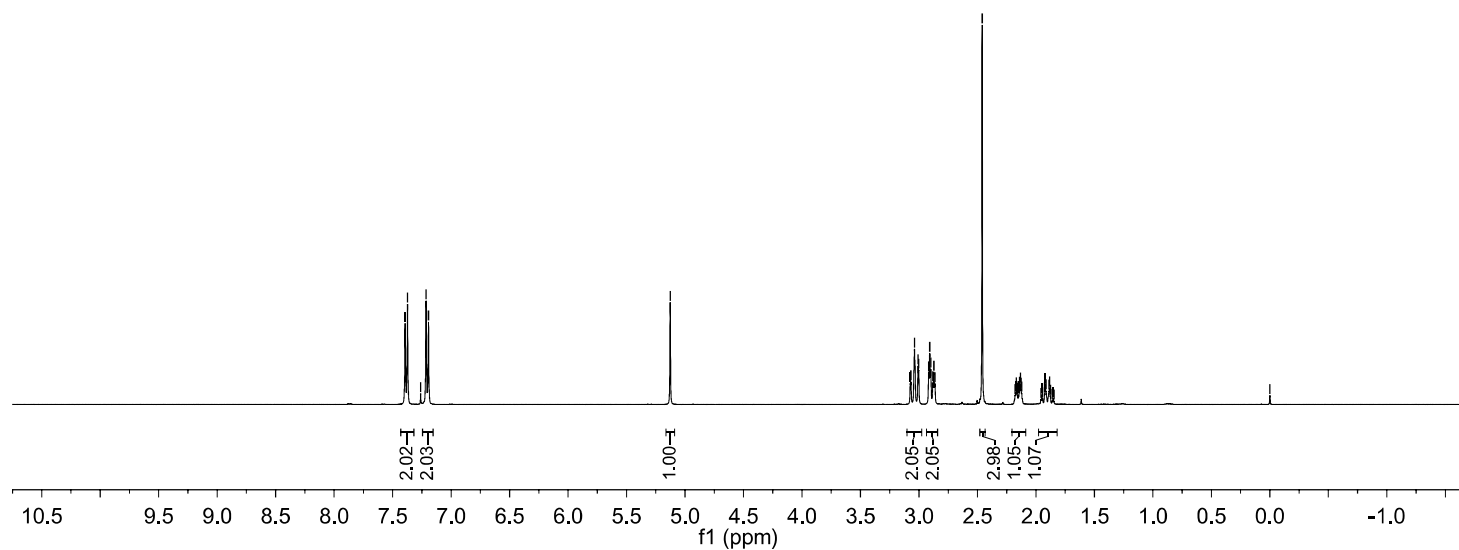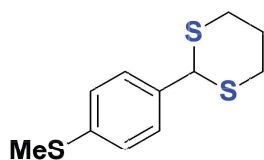

3c

138.787  
135.618  
128.073  
126.365  
77.317  
77.000  
76.682  
50.763  
31.978  
24.911  
15.517

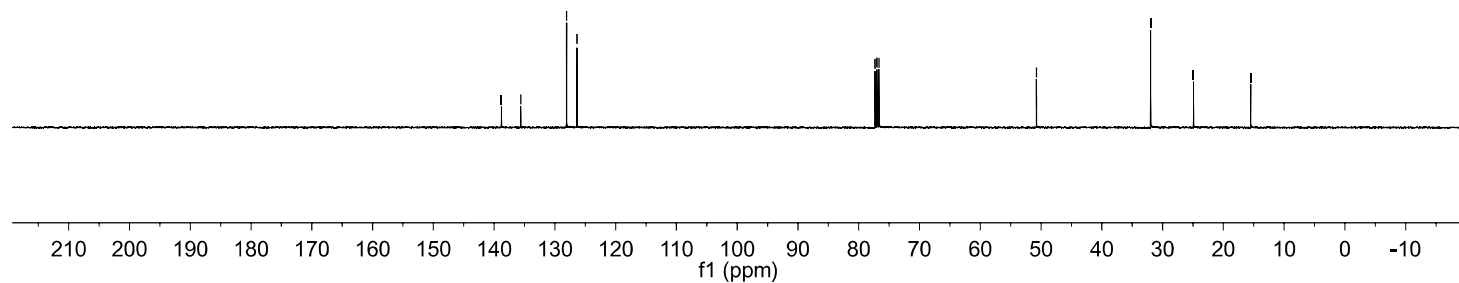

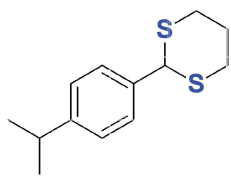

3d

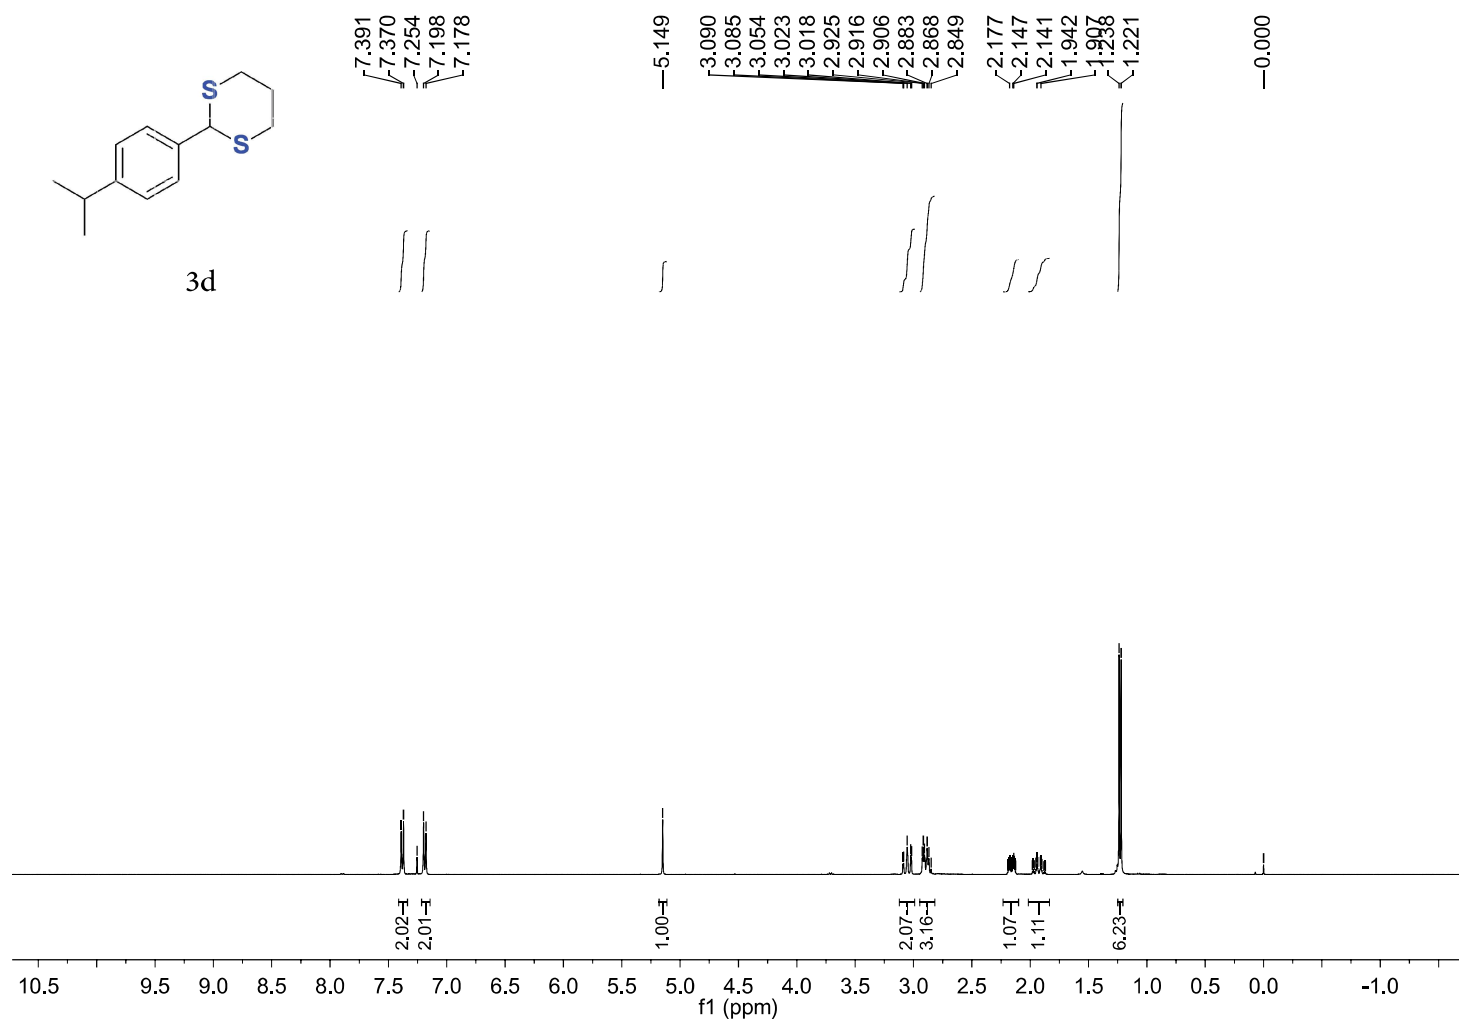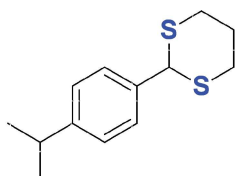

3d

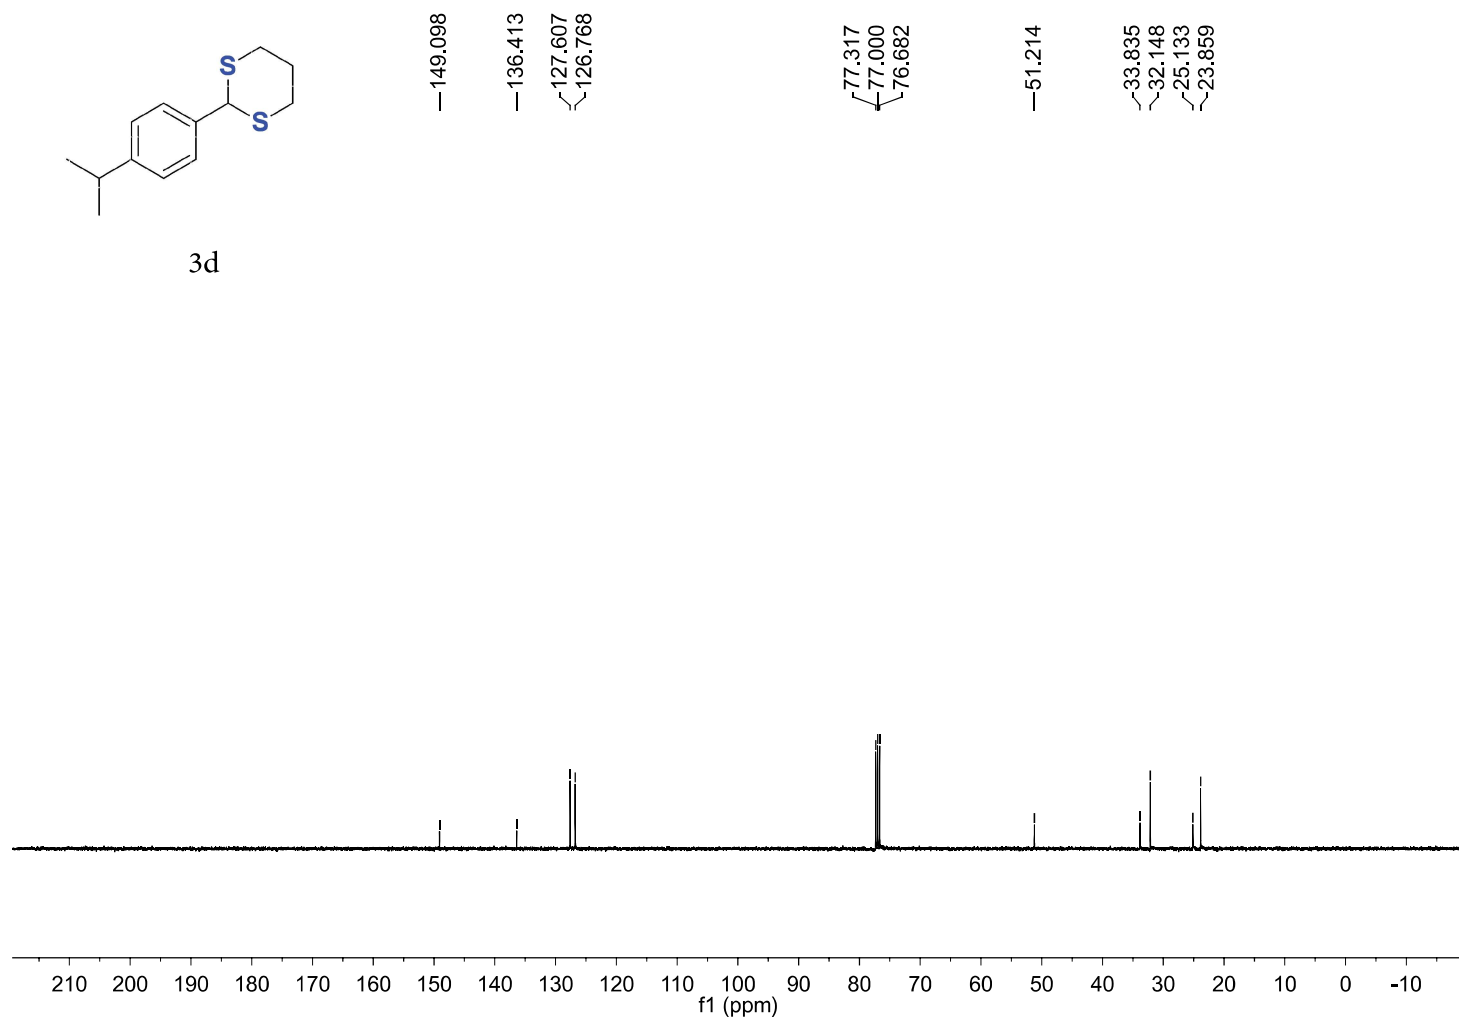

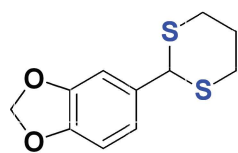

3e

7.262 6.982 6.978 6.950 6.946 6.930 6.926 6.764 6.744 5.949 5.087 3.076 3.070 3.039 3.009 3.003 2.917 2.907 2.899 2.881 2.872 2.863 2.175 2.170 2.164 2.145 2.140 2.135 2.129 2.124 1.919 1.887 1.883 1.800

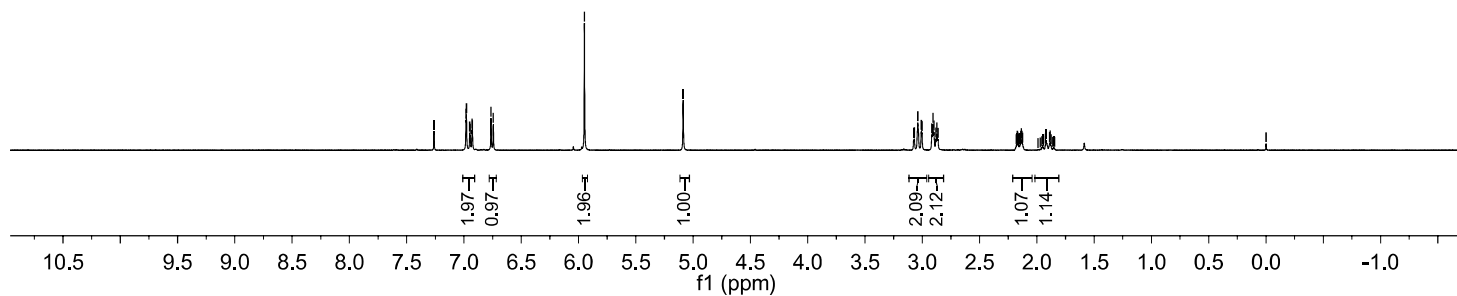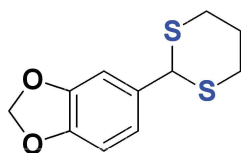

3e

147.691 147.569 132.875 121.241 108.327 101.182 77.317 77.000 76.682 51.124 32.140 24.993

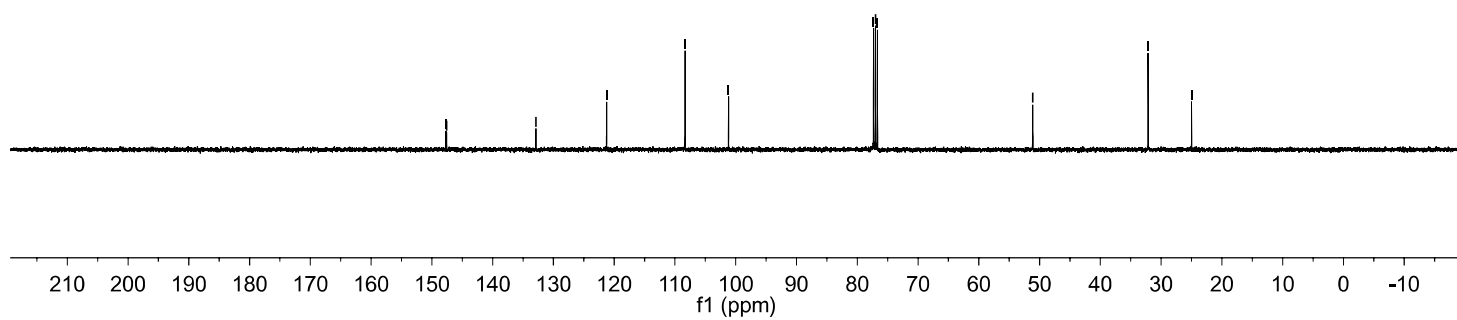

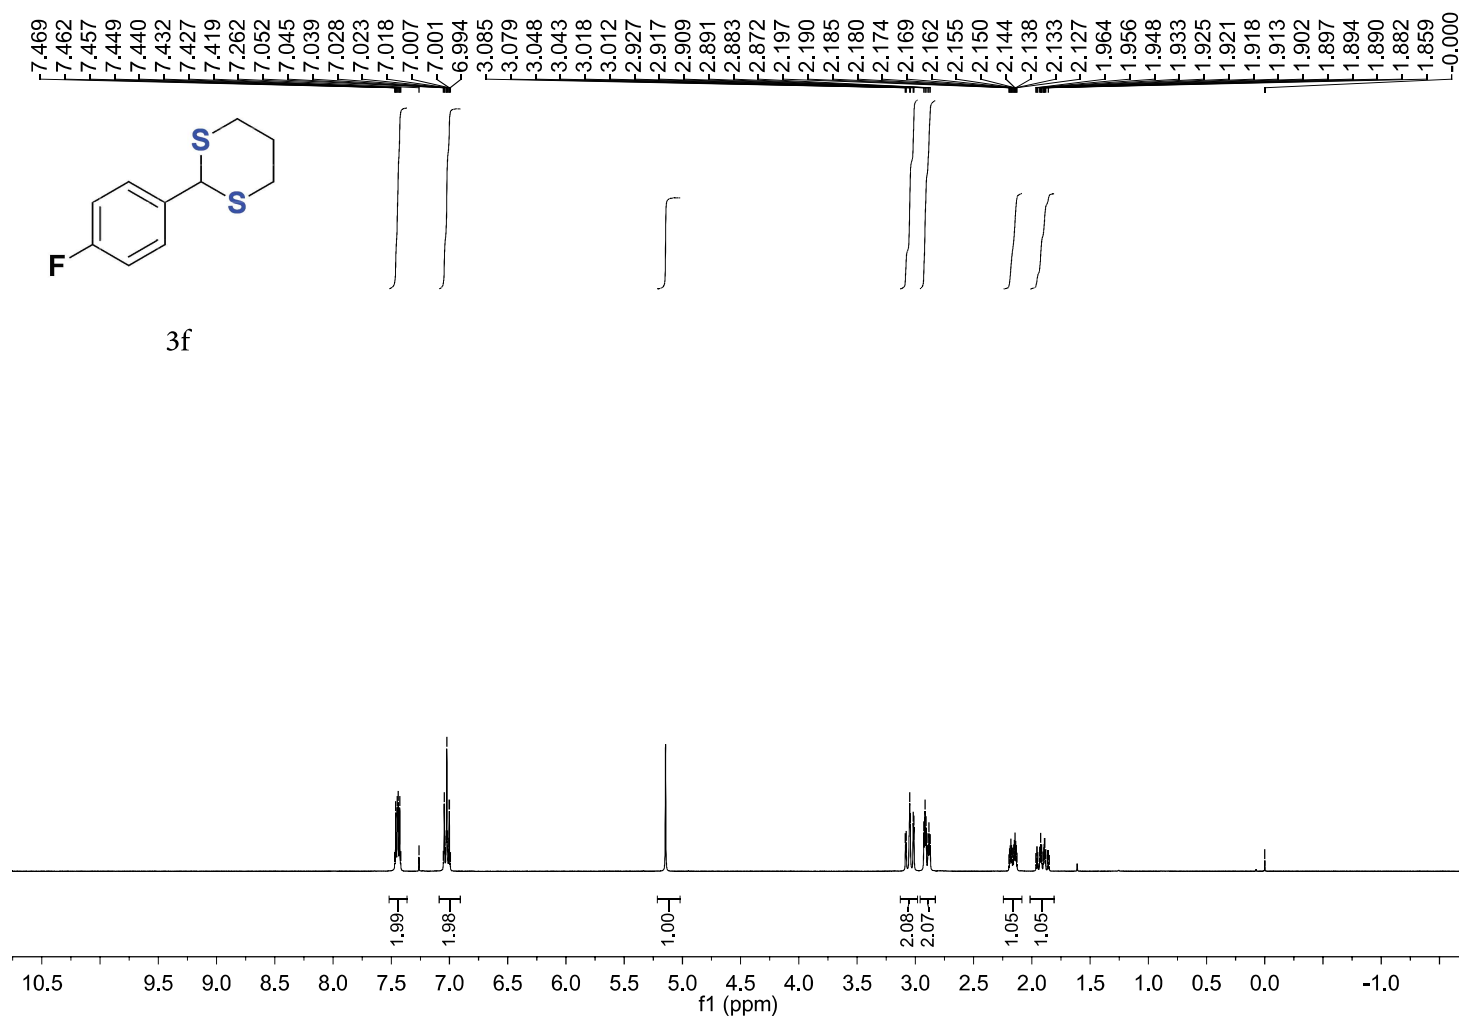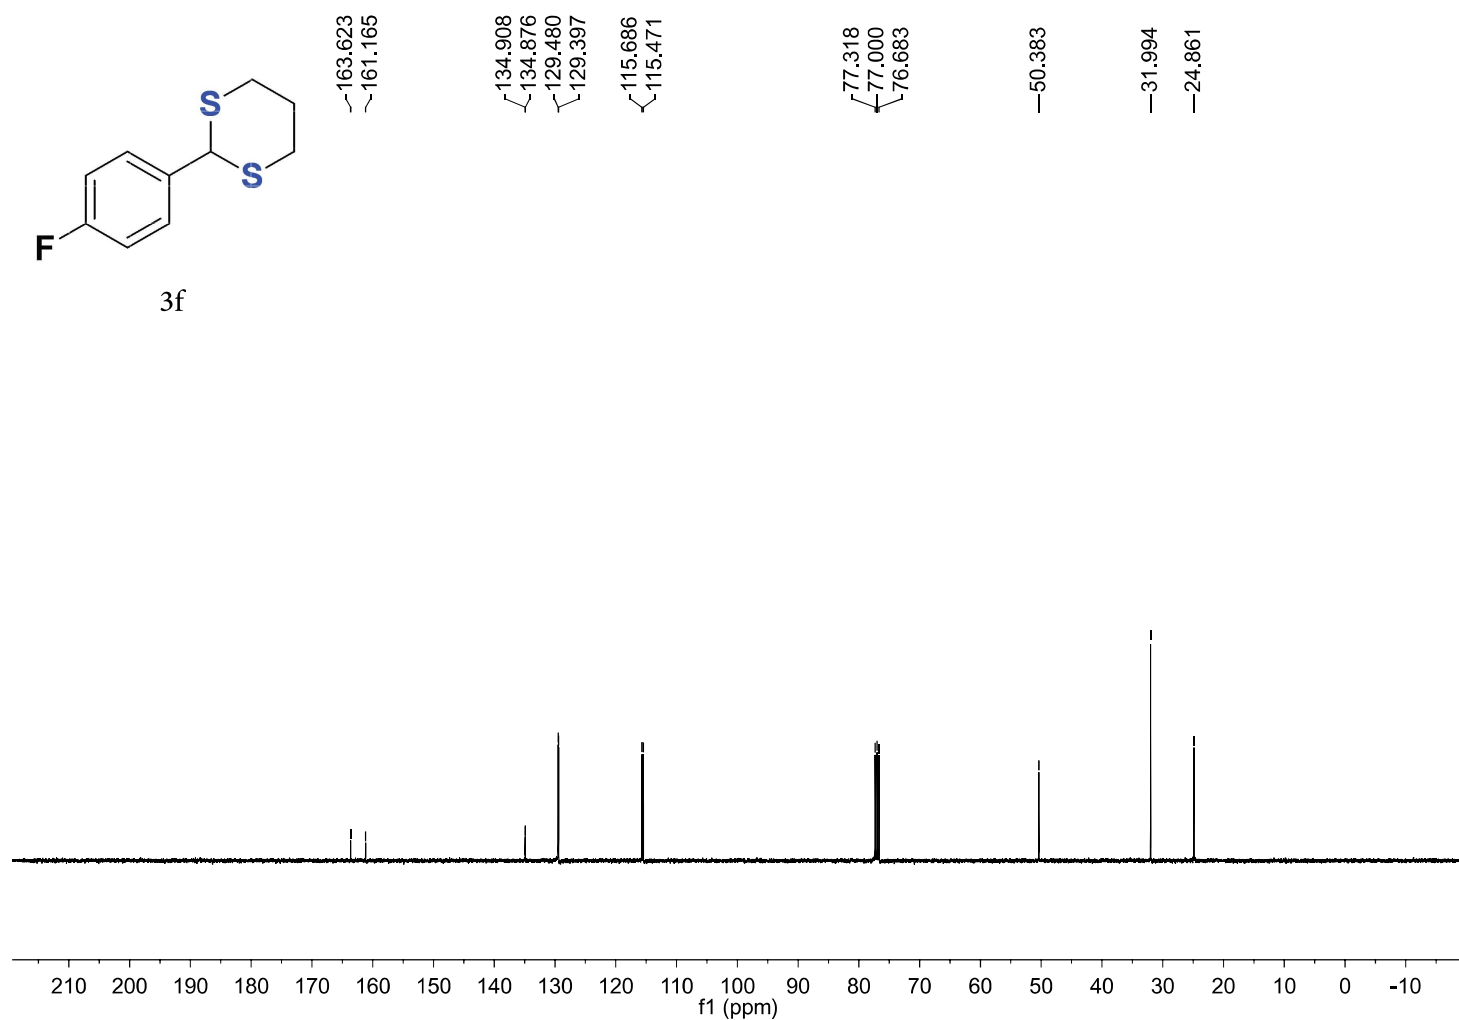

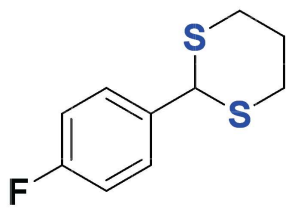

3f

—113.172

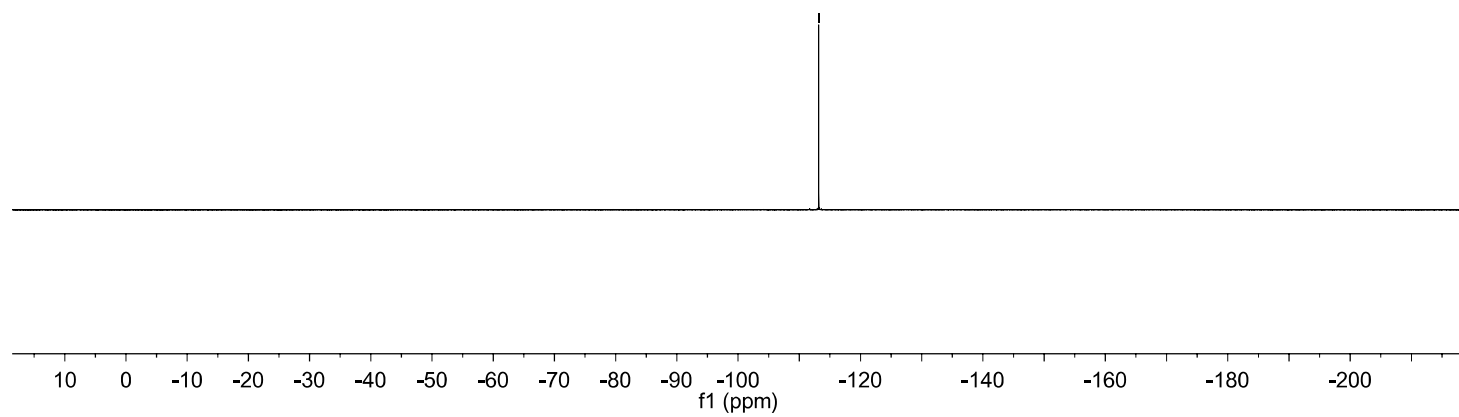



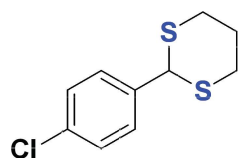

3g

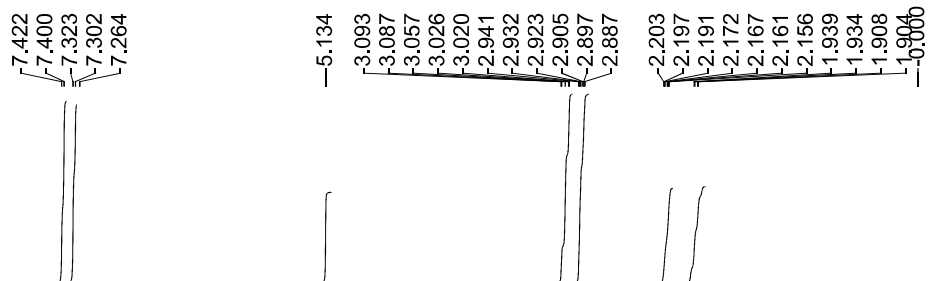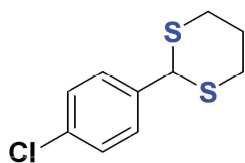

3g

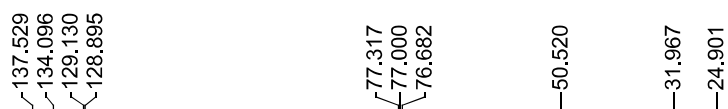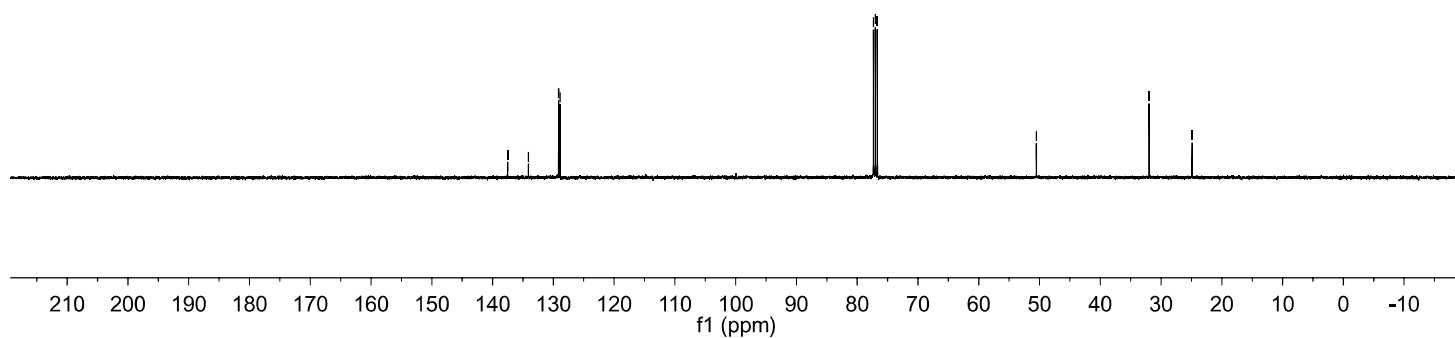

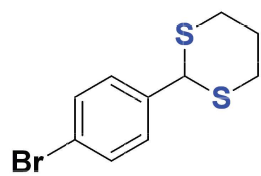

3h

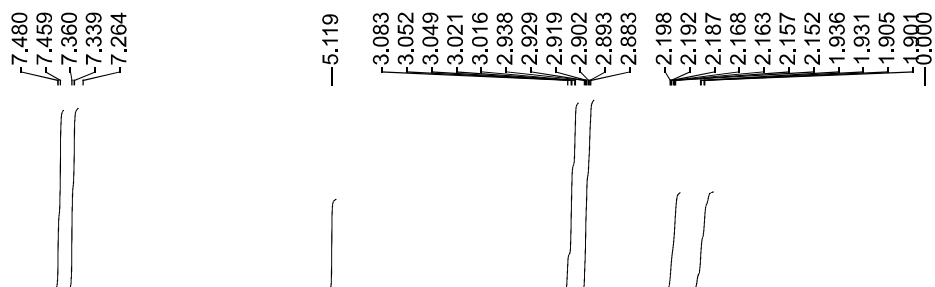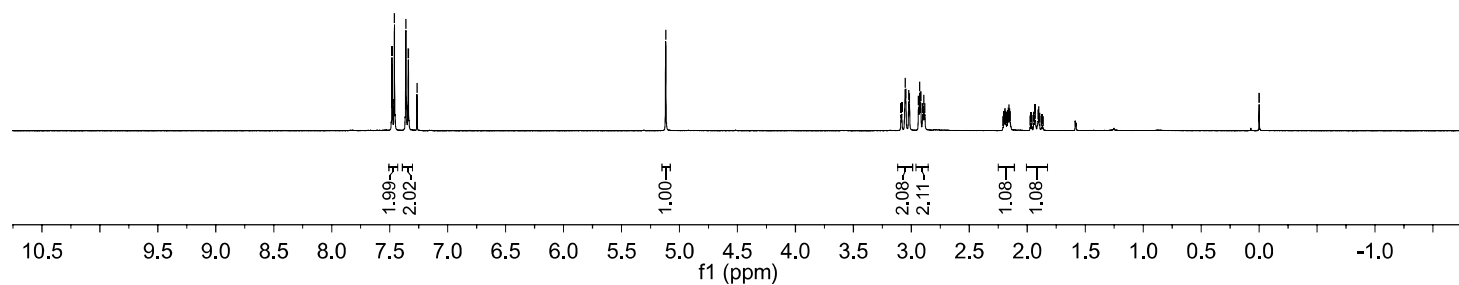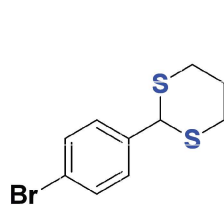

3h

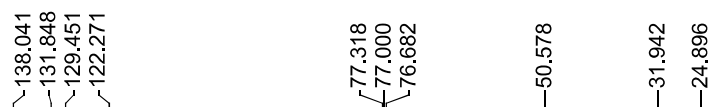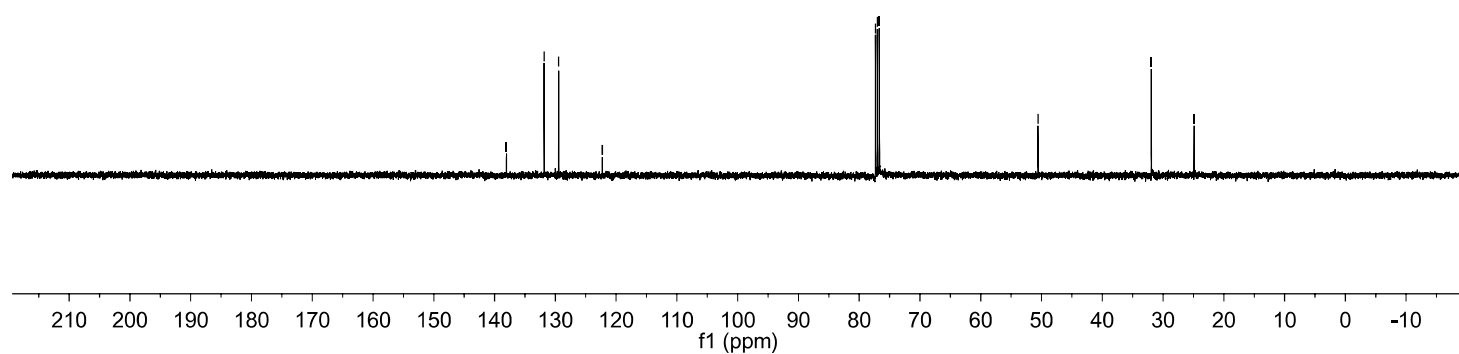

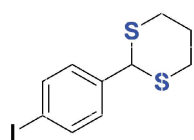

3i

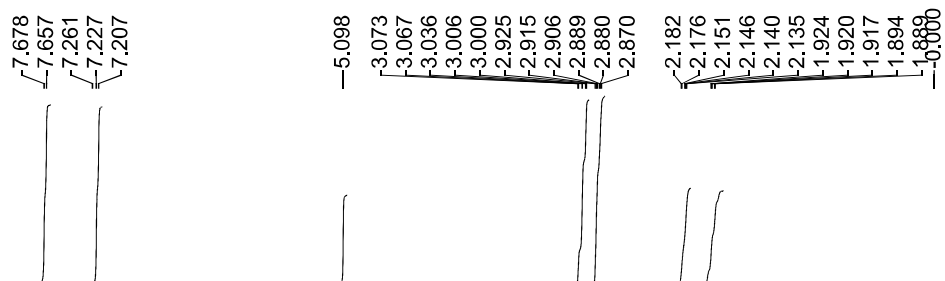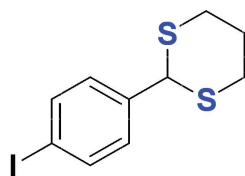

3i

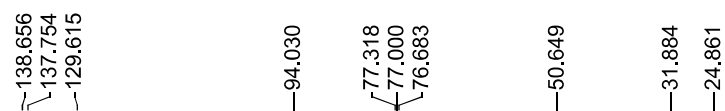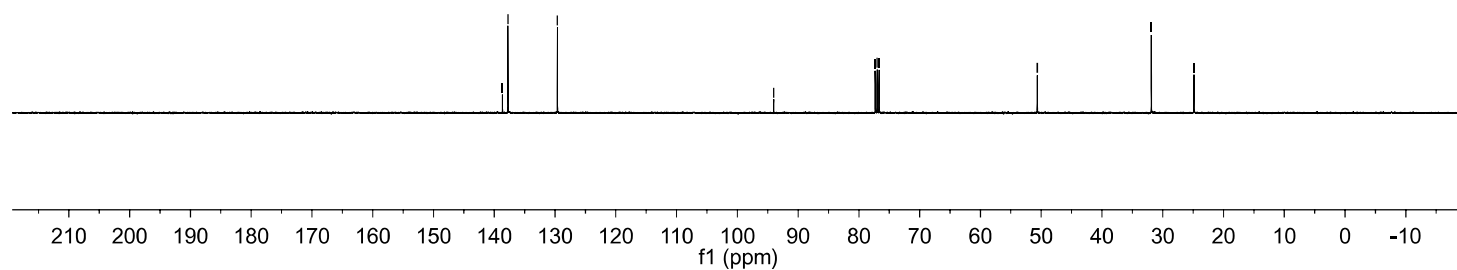

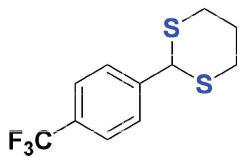

3j

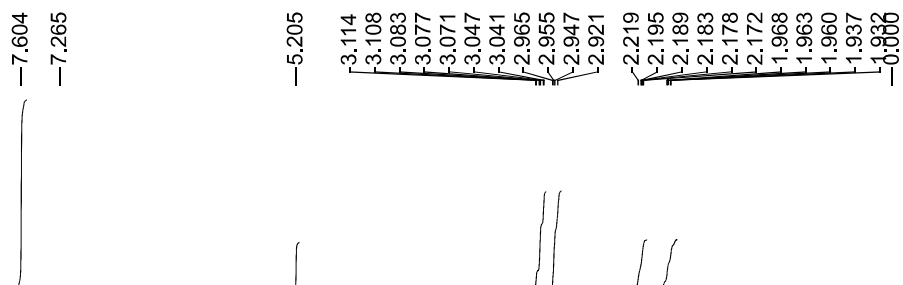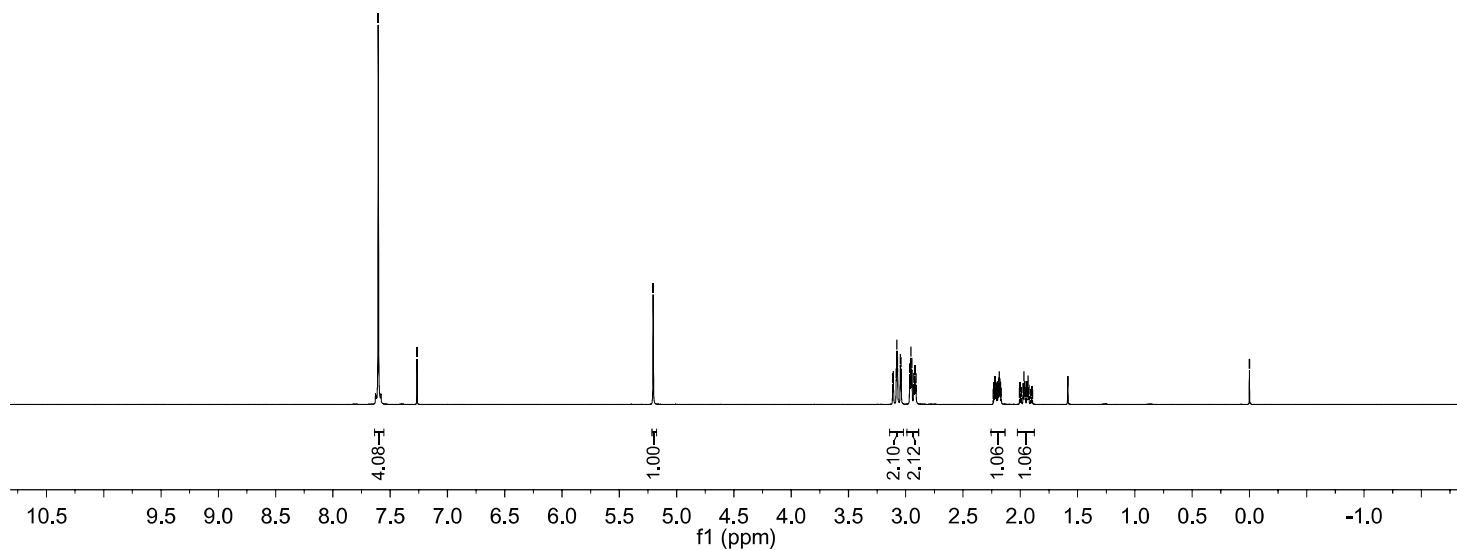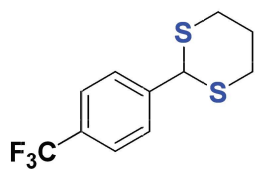

3j

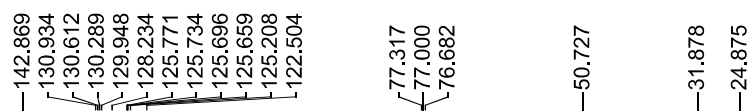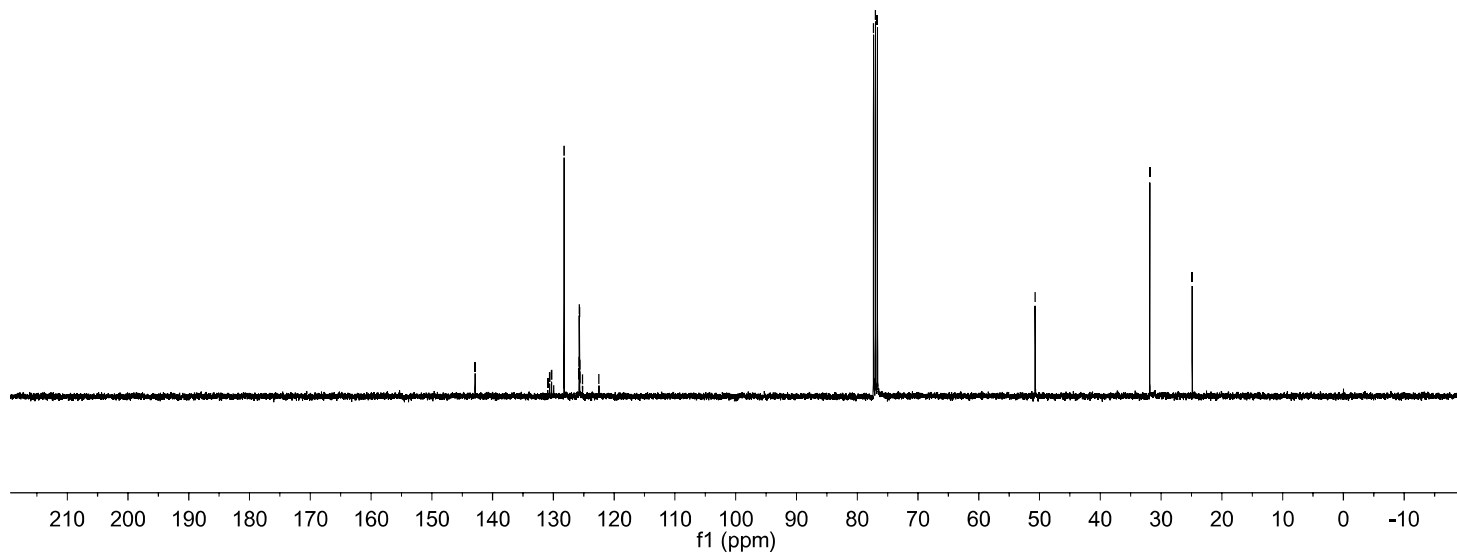

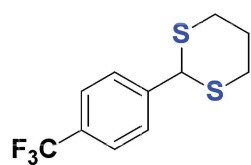

3j

62.608

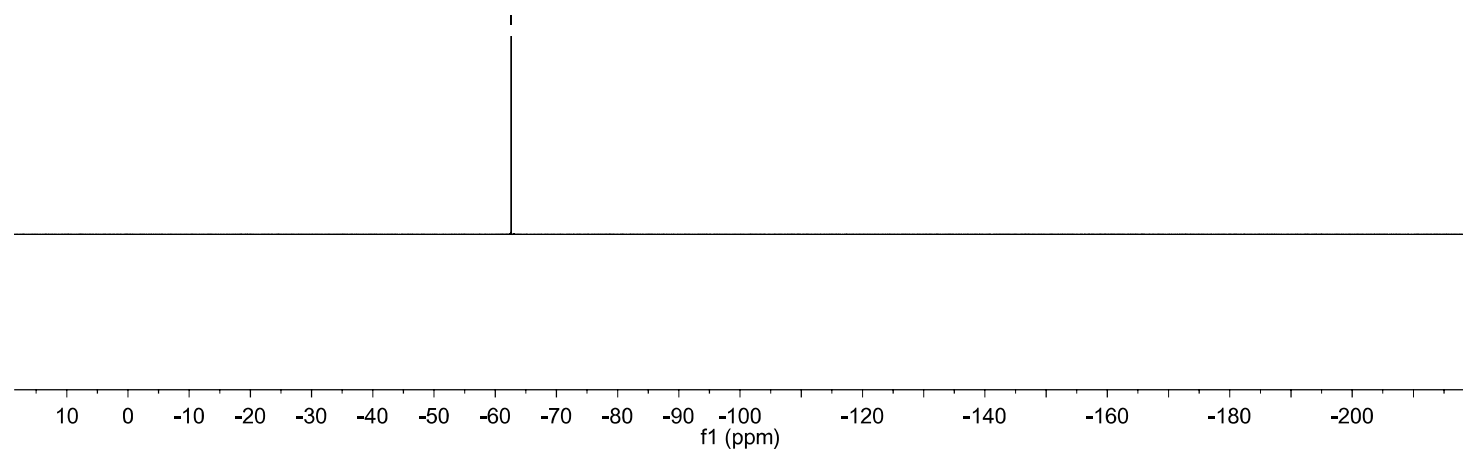

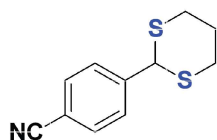

3k

7.657  
7.635  
7.599  
7.578  
7.271  
-5.184  
3.108  
3.102  
3.071  
3.065  
3.041  
3.035  
2.967  
2.956  
2.948  
2.931  
2.922  
2.222  
2.216  
2.198  
2.192  
2.186  
2.180  
1.963  
1.957  
1.955  
1.932  
1.927  
1.000

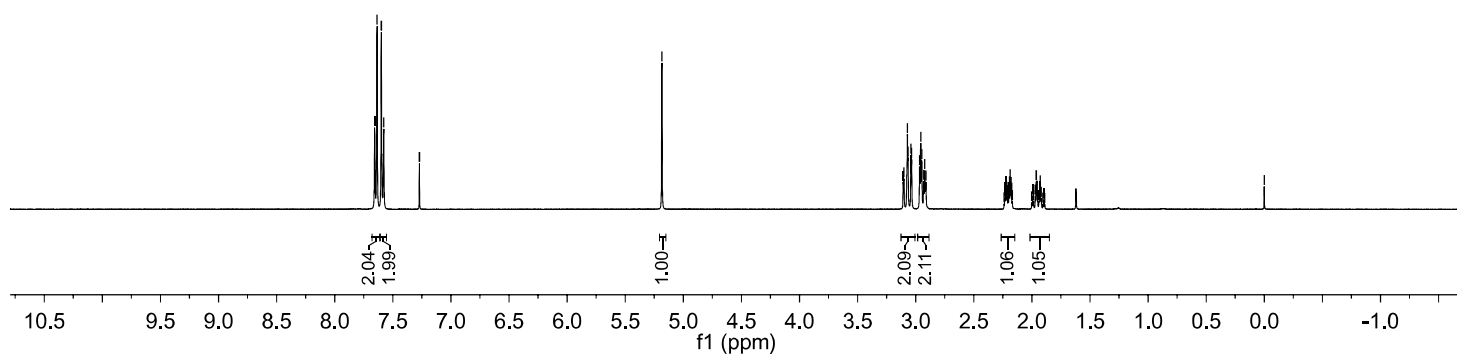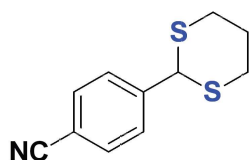

3k

-144.110  
-132.528  
-128.656  
-118.457  
-112.107  
77.318  
77.000  
76.682  
-50.655  
-31.729  
-24.754

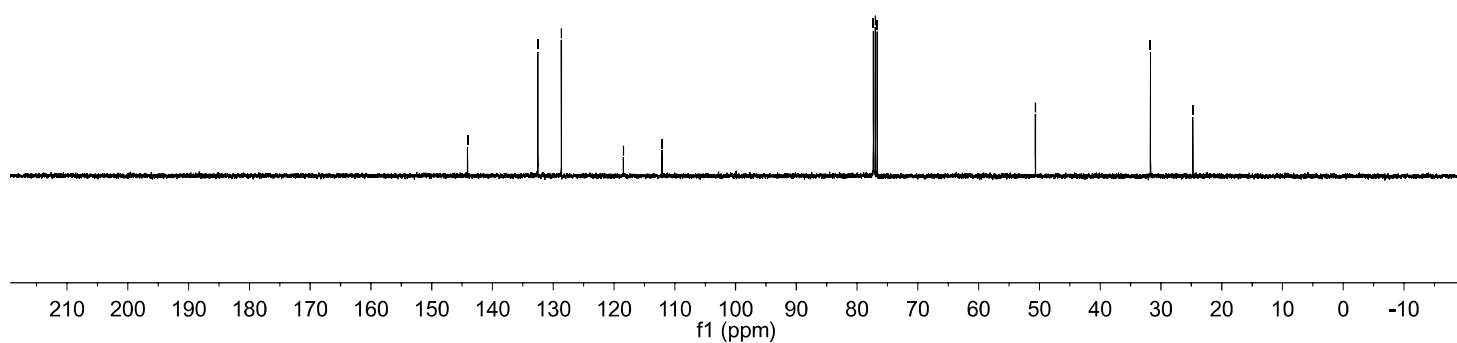

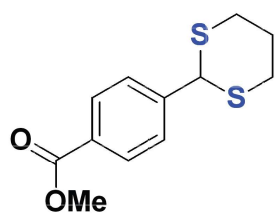

31

8.020  
7.999  
7.556  
7.535  
7.267  
-5.200  
-3.903  
3.061  
3.055  
3.031  
2.936  
2.928  
2.197  
2.191  
2.172  
2.167  
2.161  
2.155  
1.960  
1.955  
1.953  
1.930  
1.925  
0.000

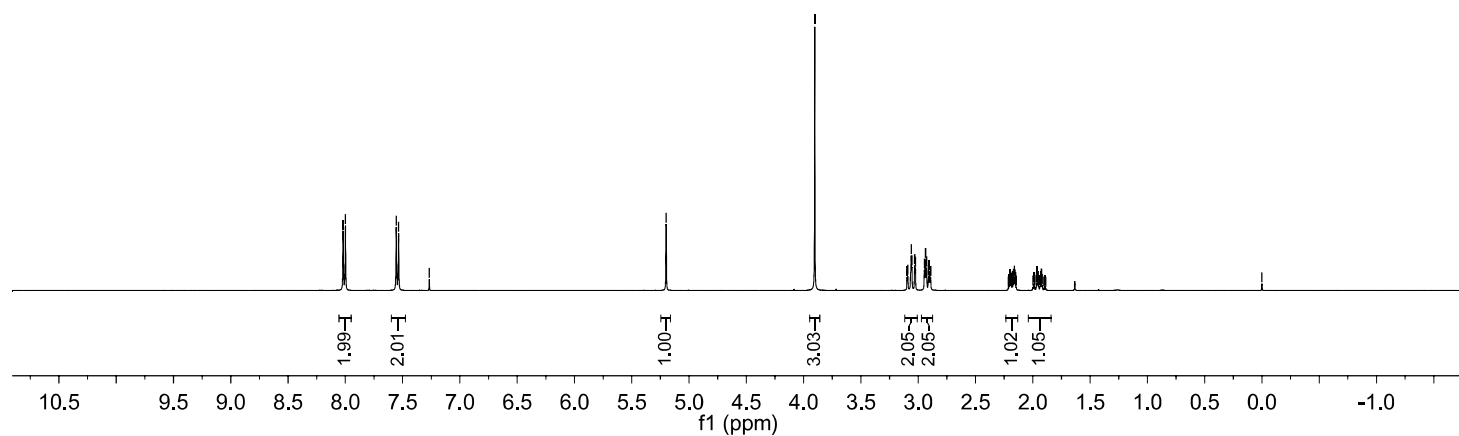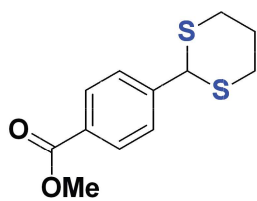

31

166.515  
143.928  
130.092  
129.985  
127.853  
77.318  
77.000  
76.682  
52.084  
51.009  
31.849  
24.965

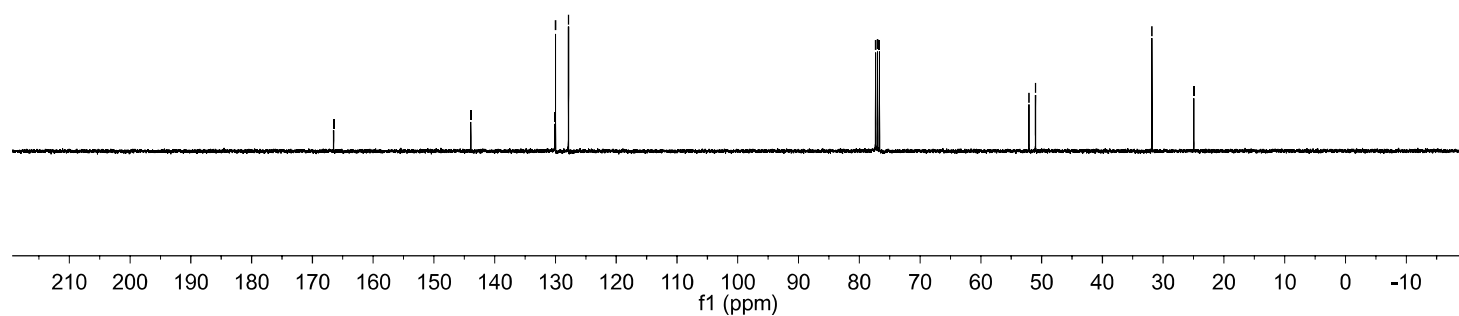

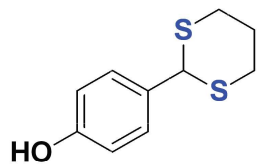

3m

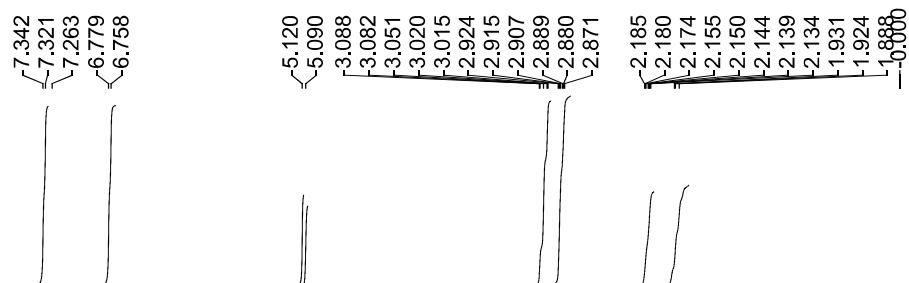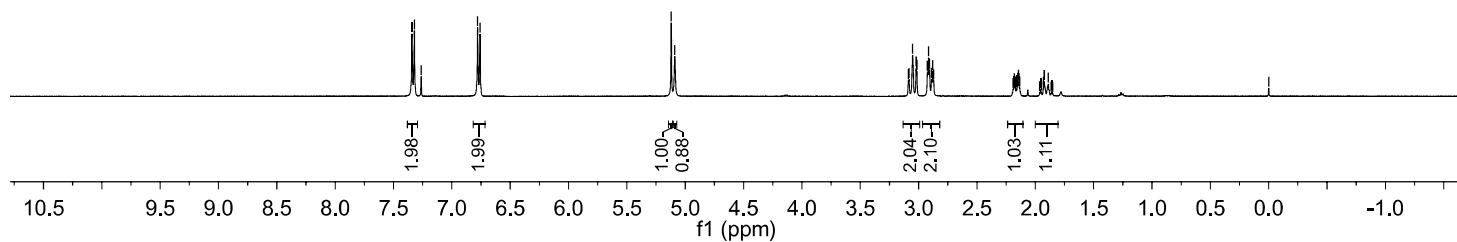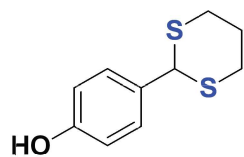

3m

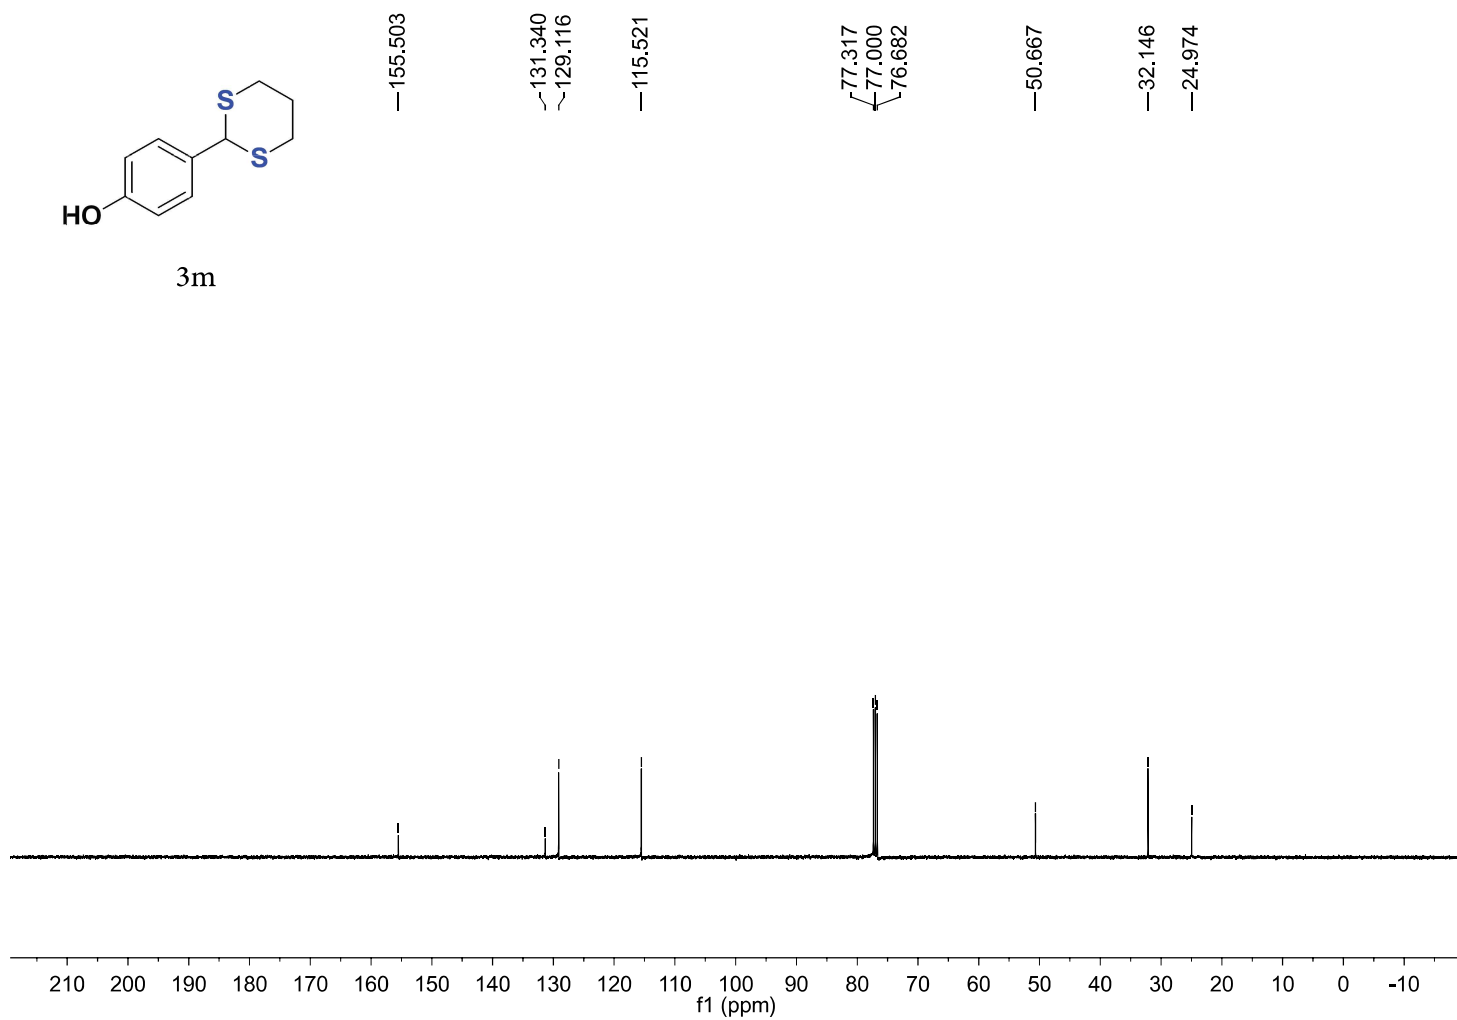



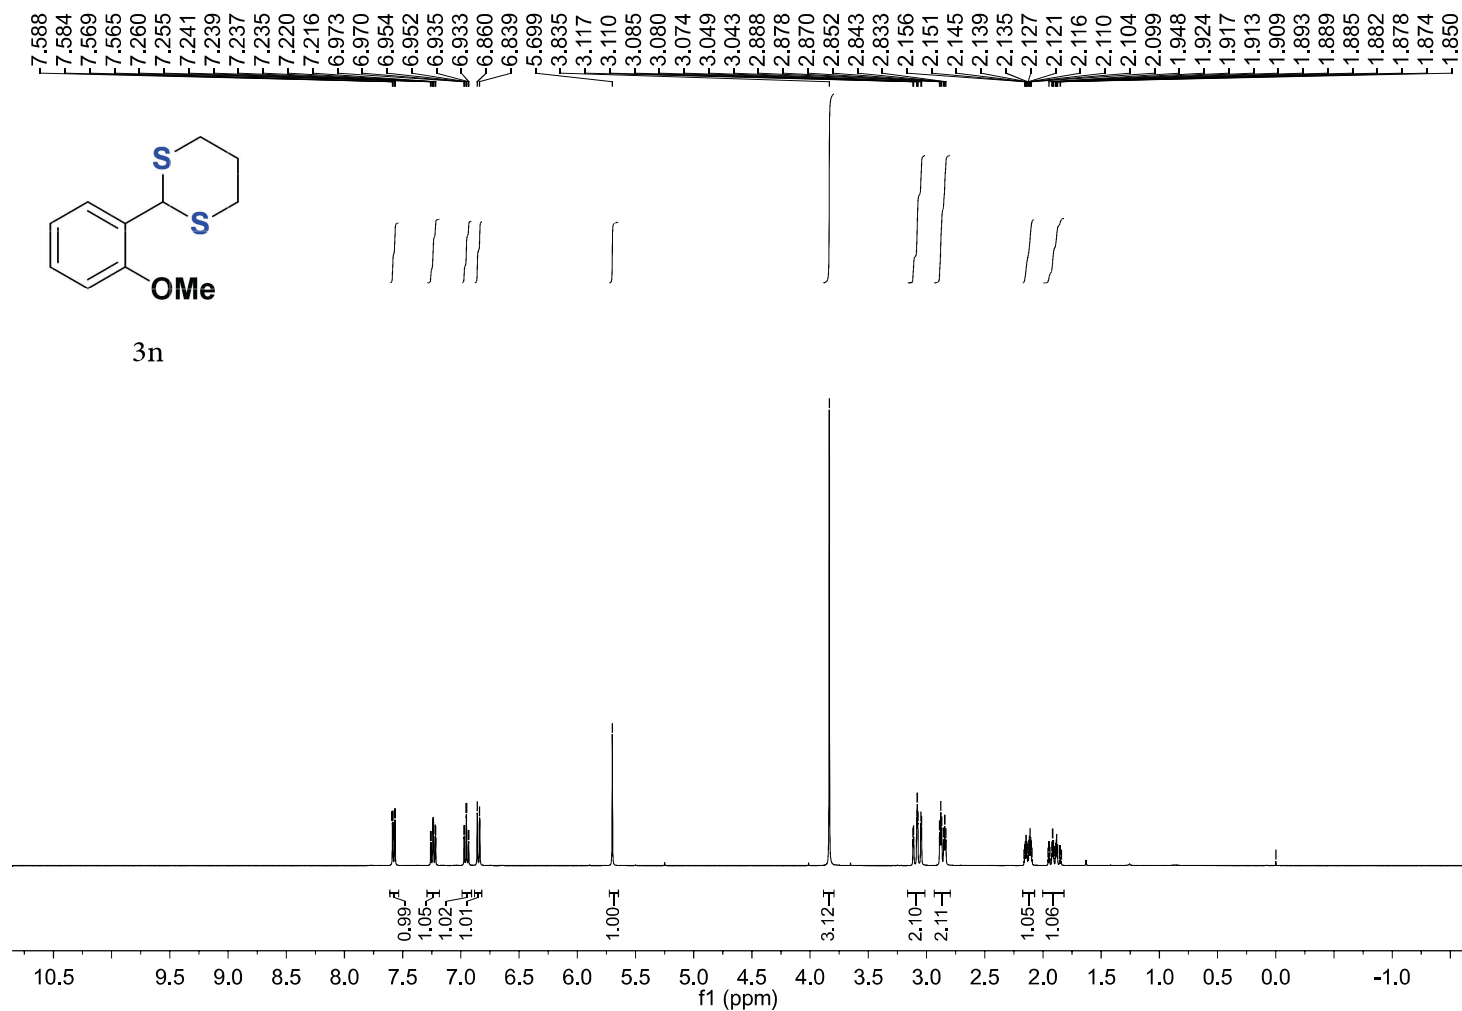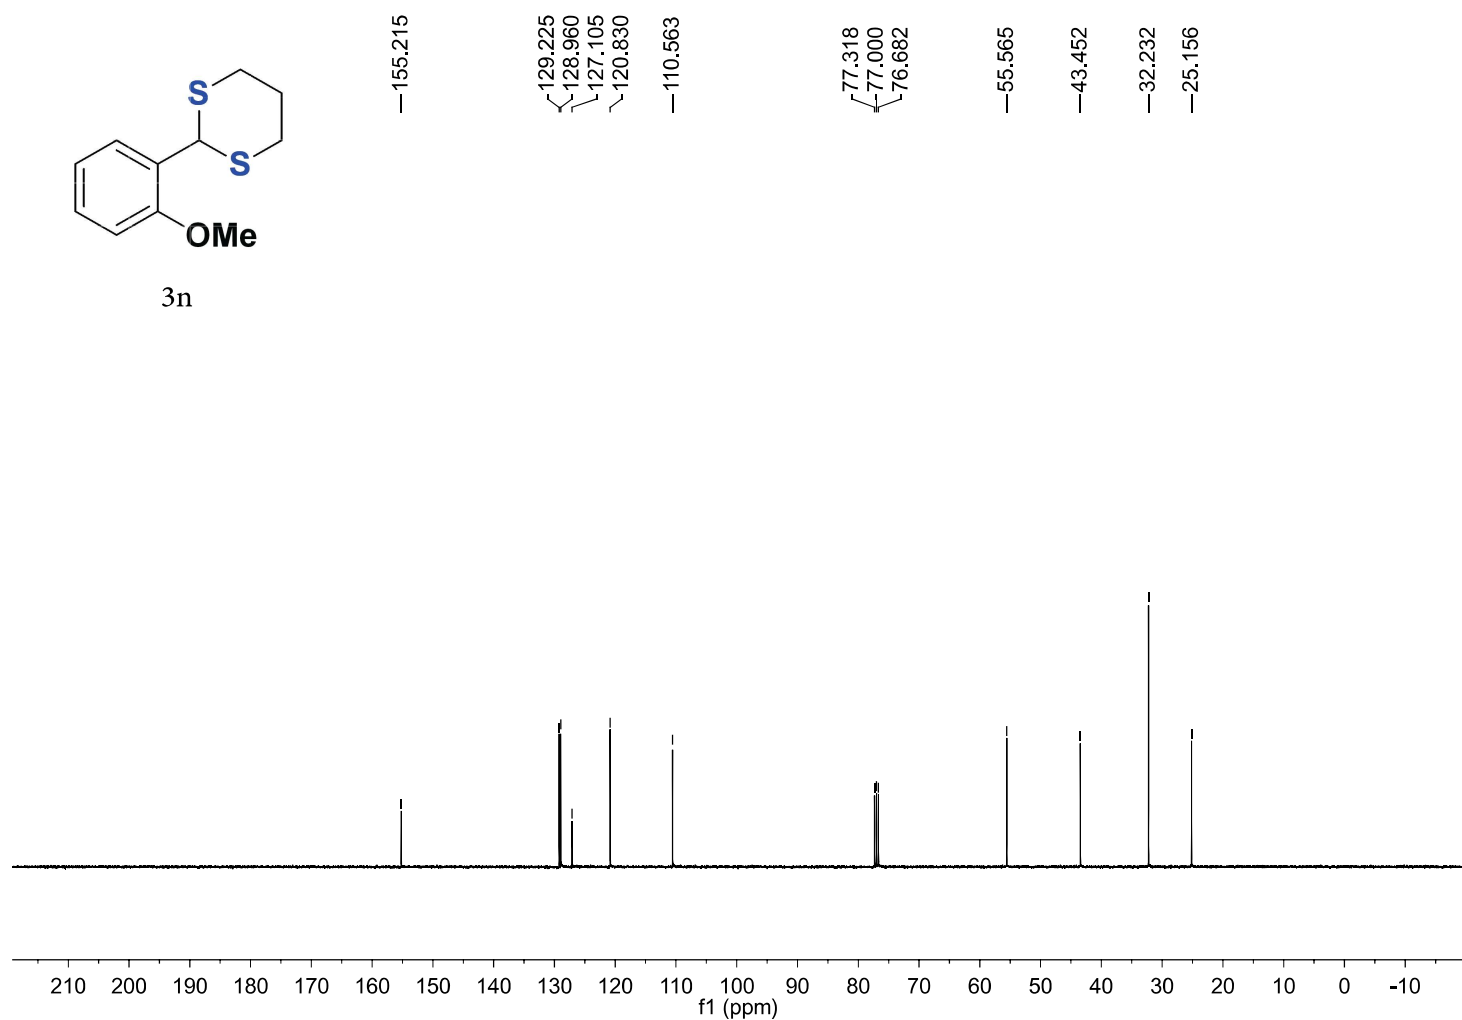

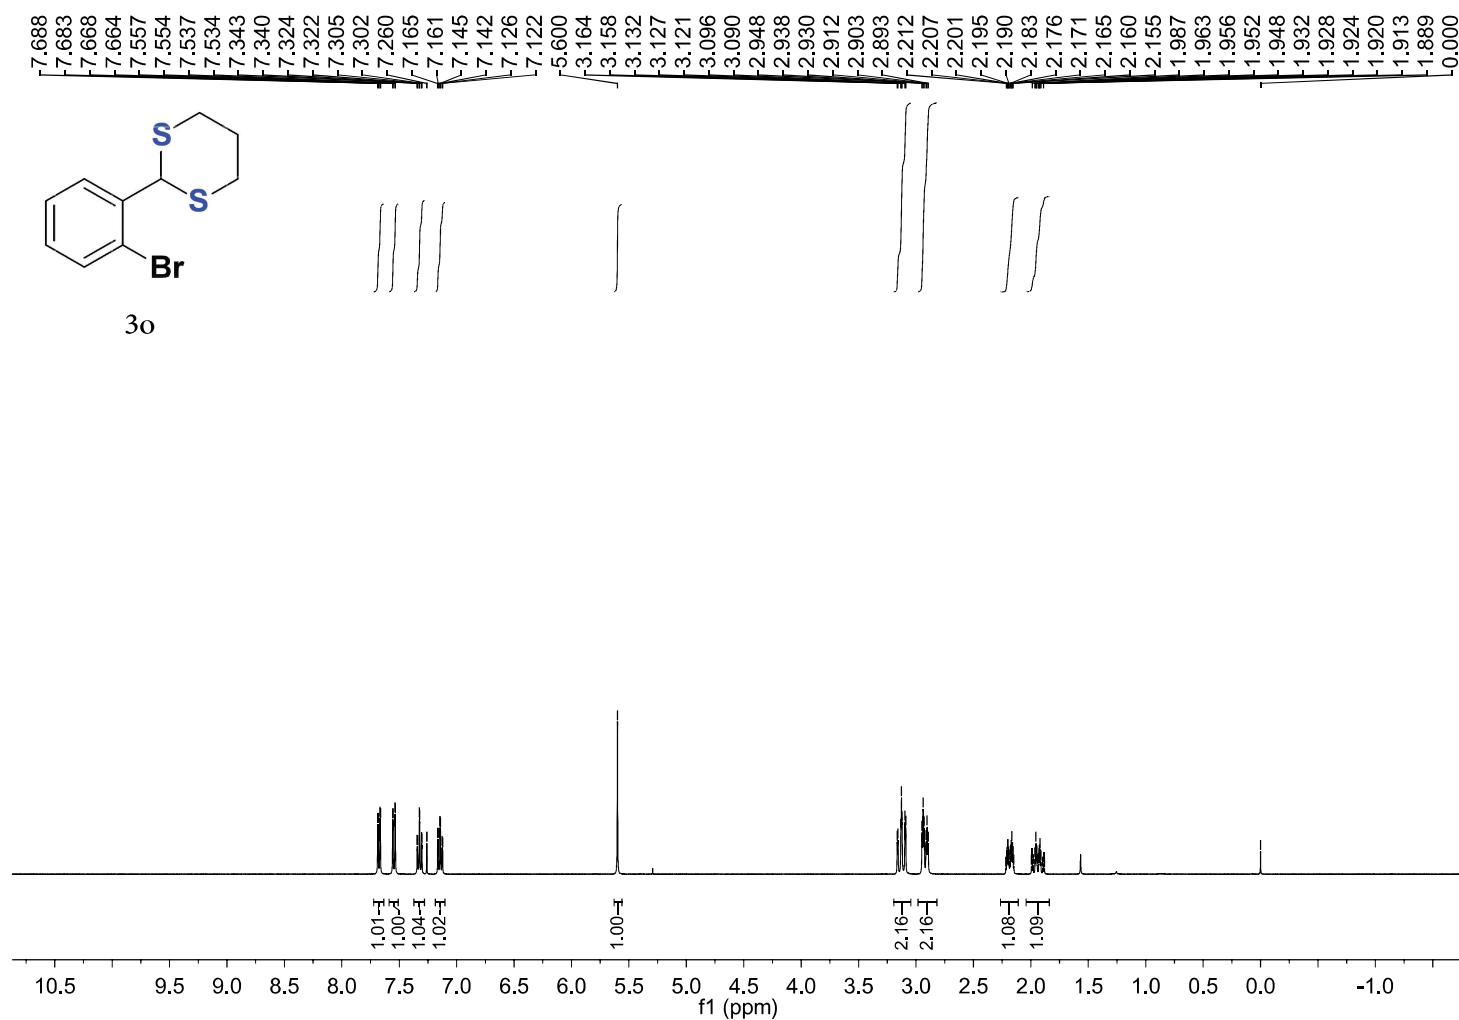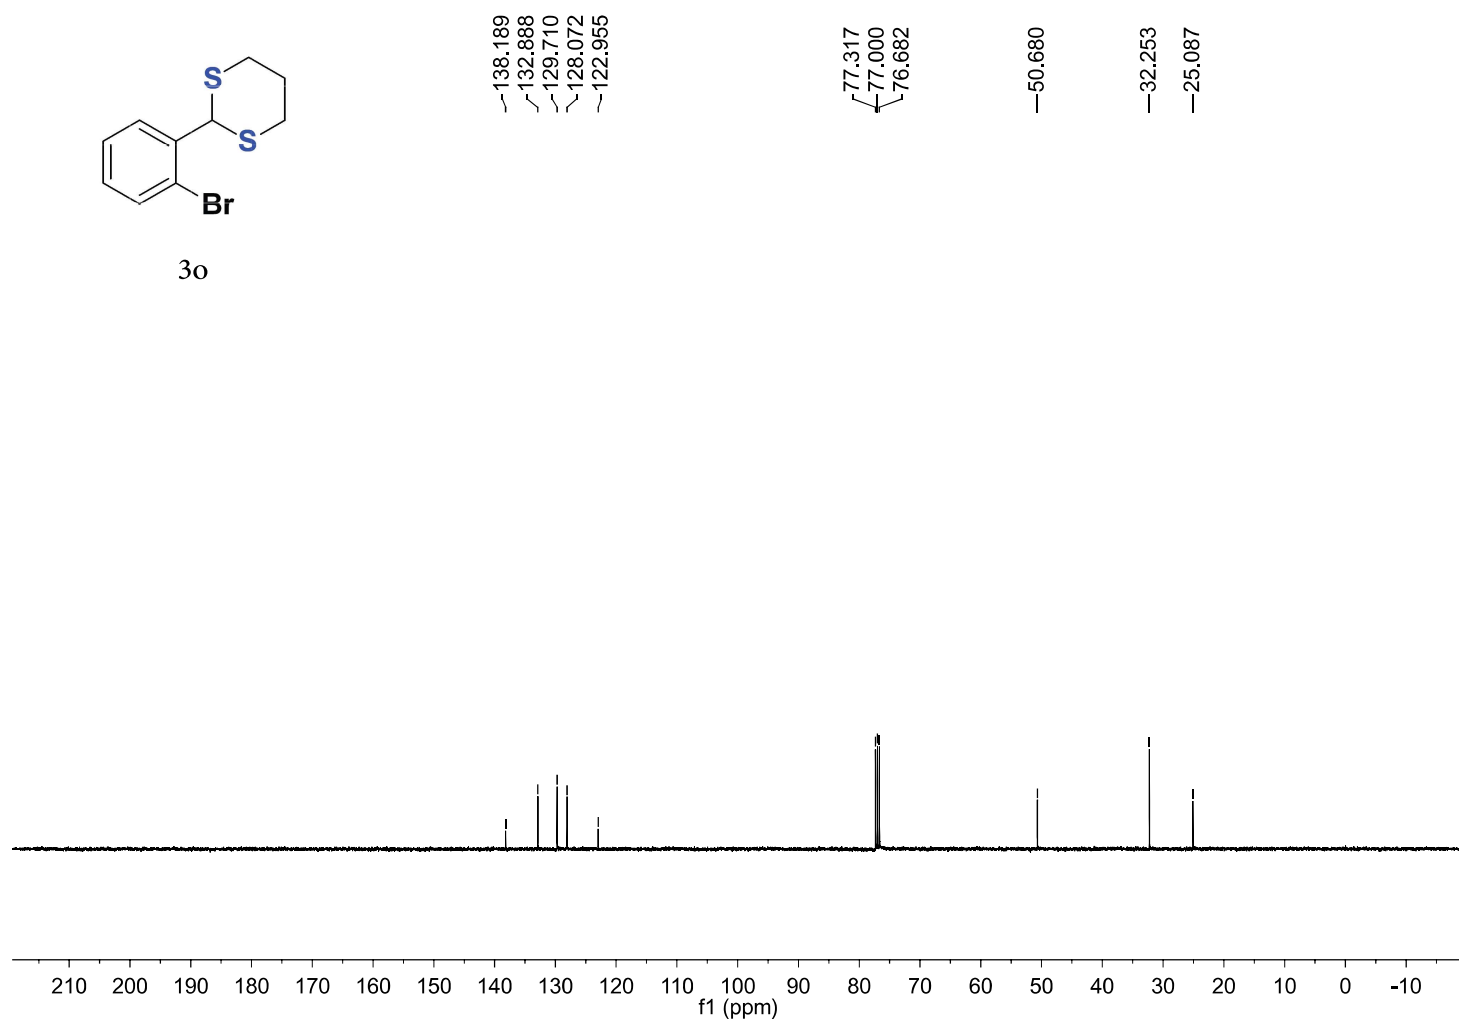

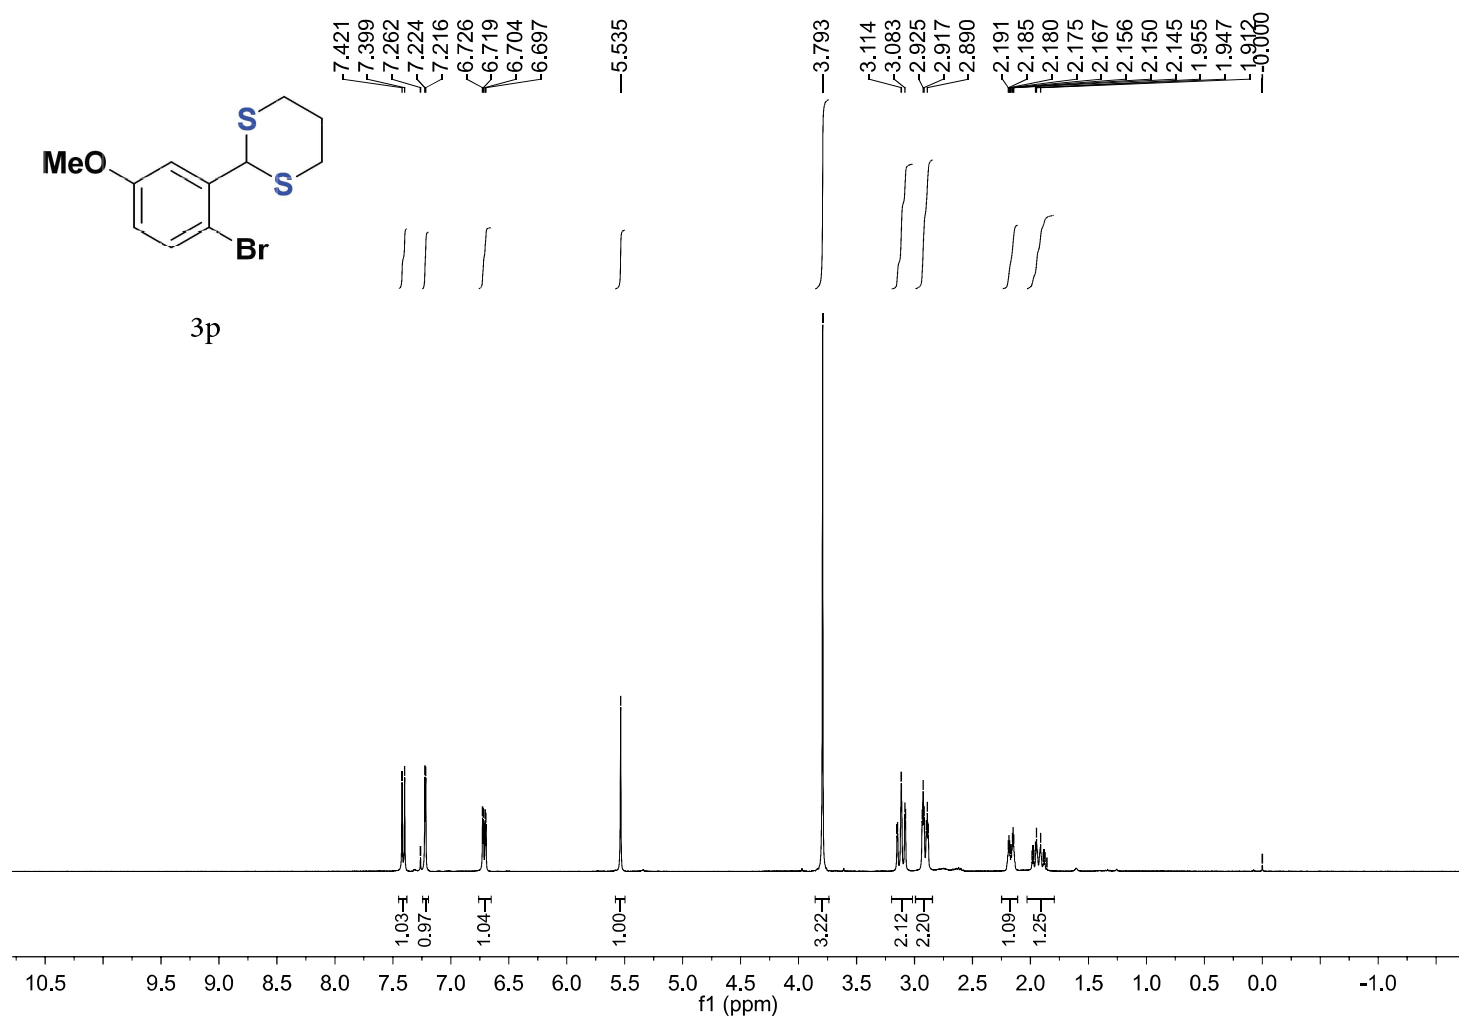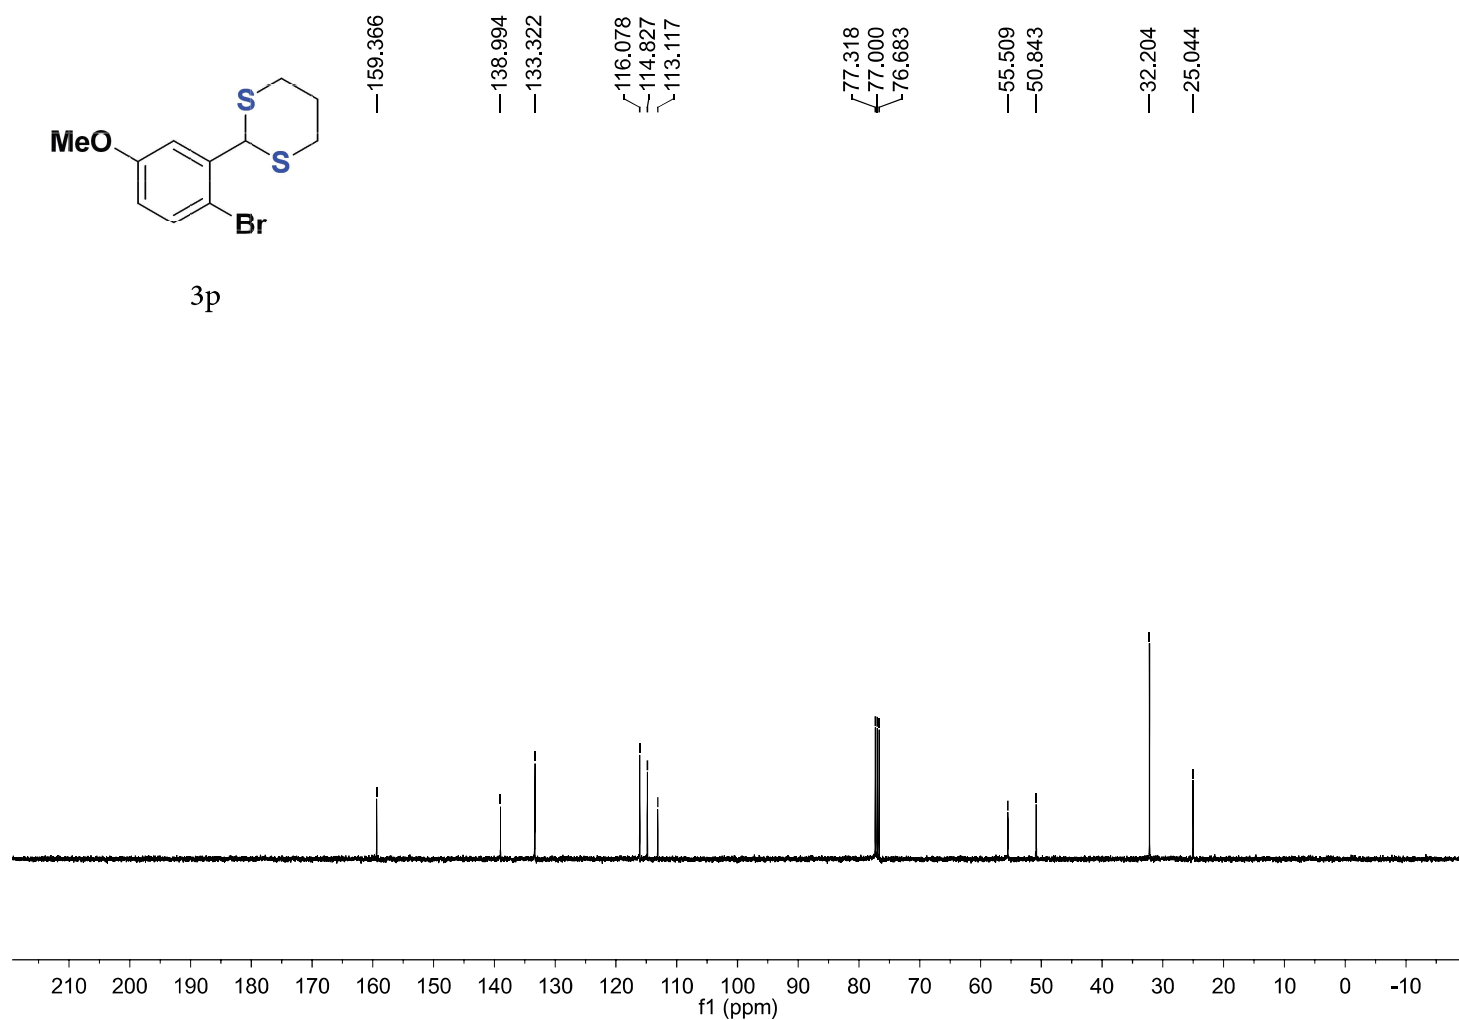

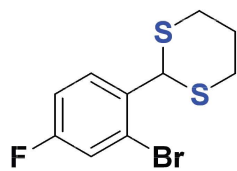

3q

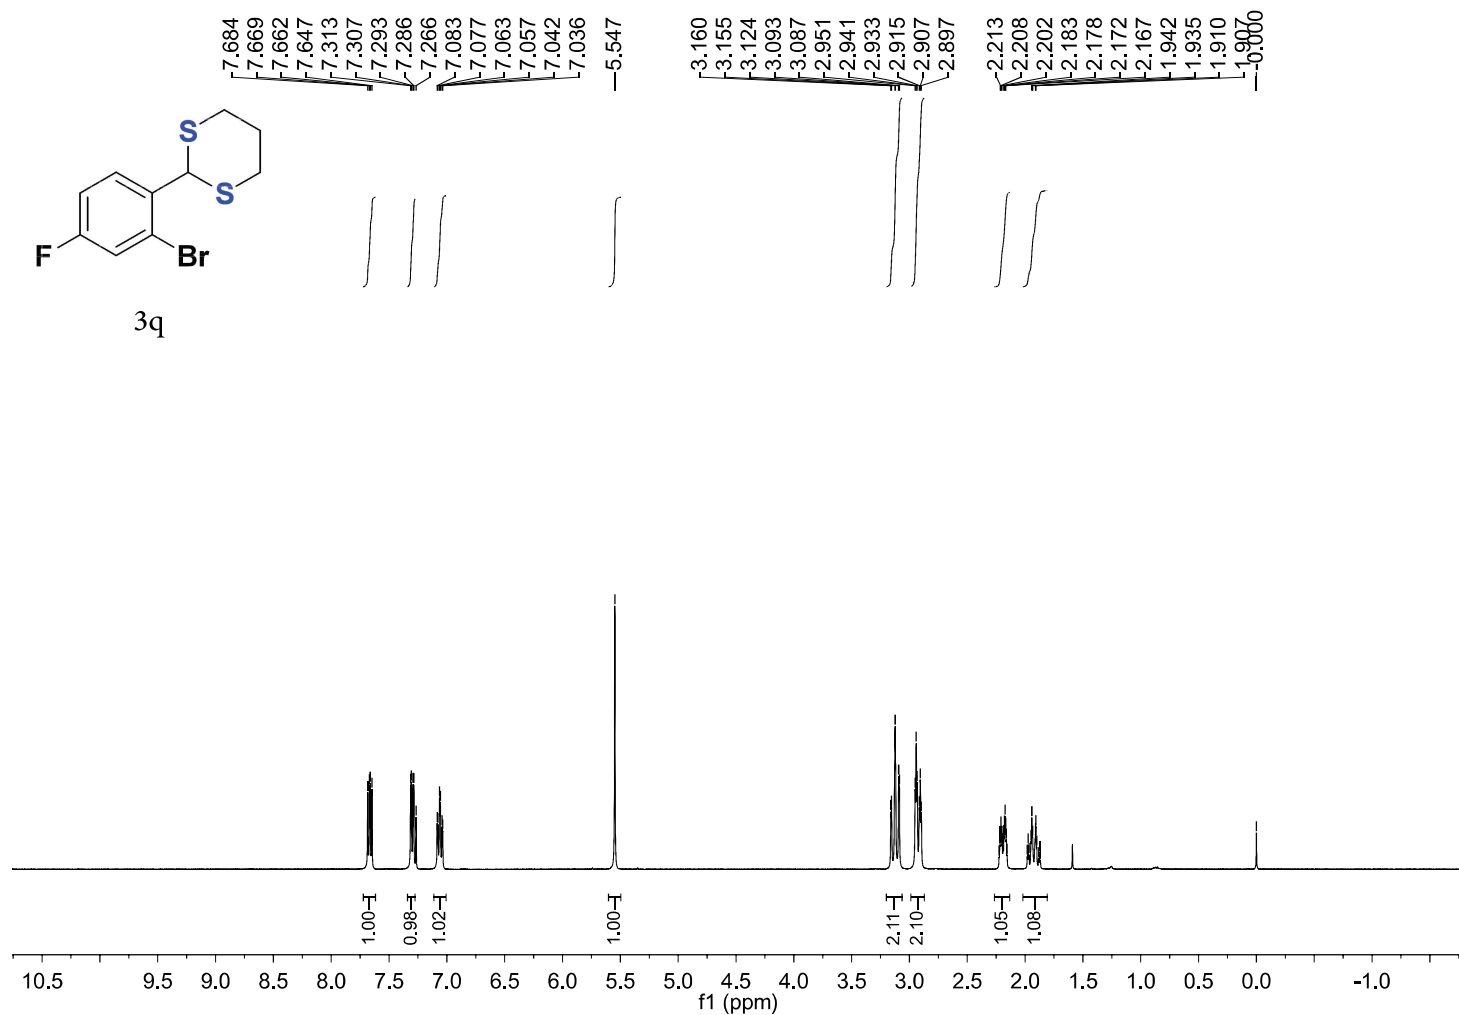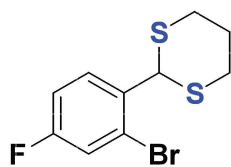

3q

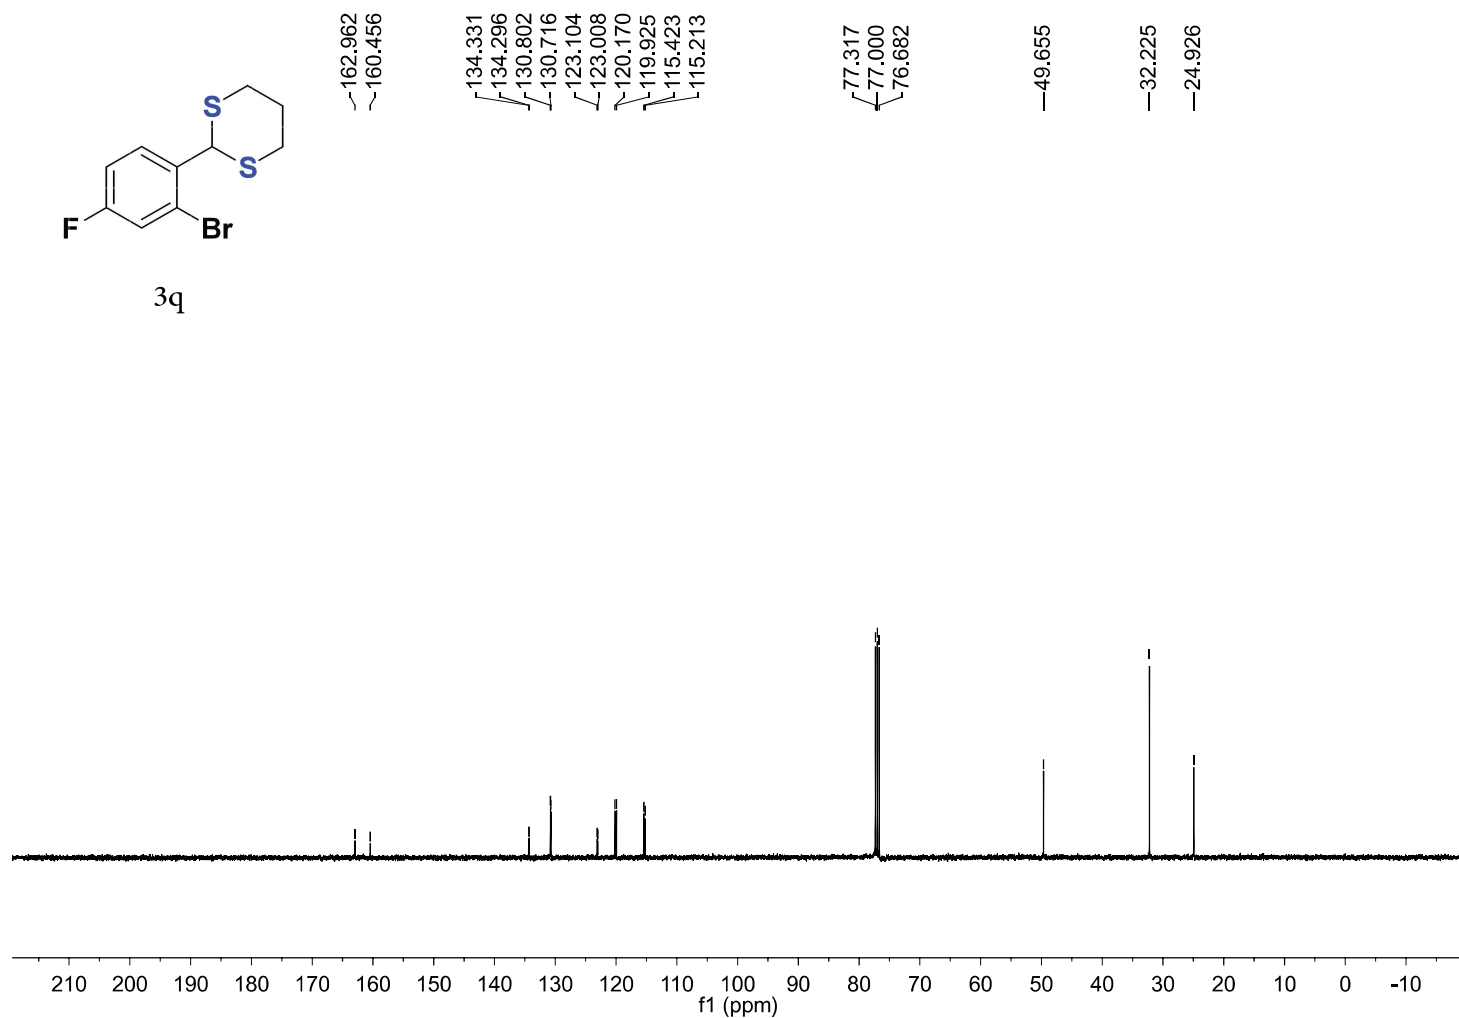

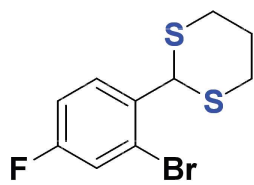

3q

—110.979

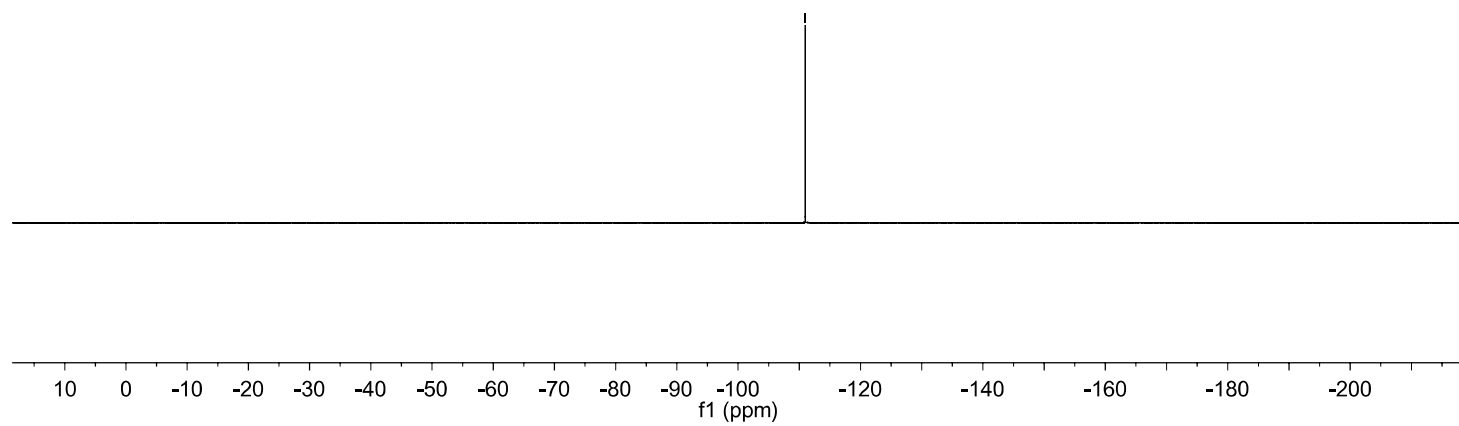

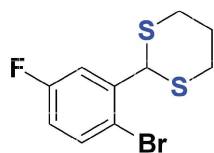

3r

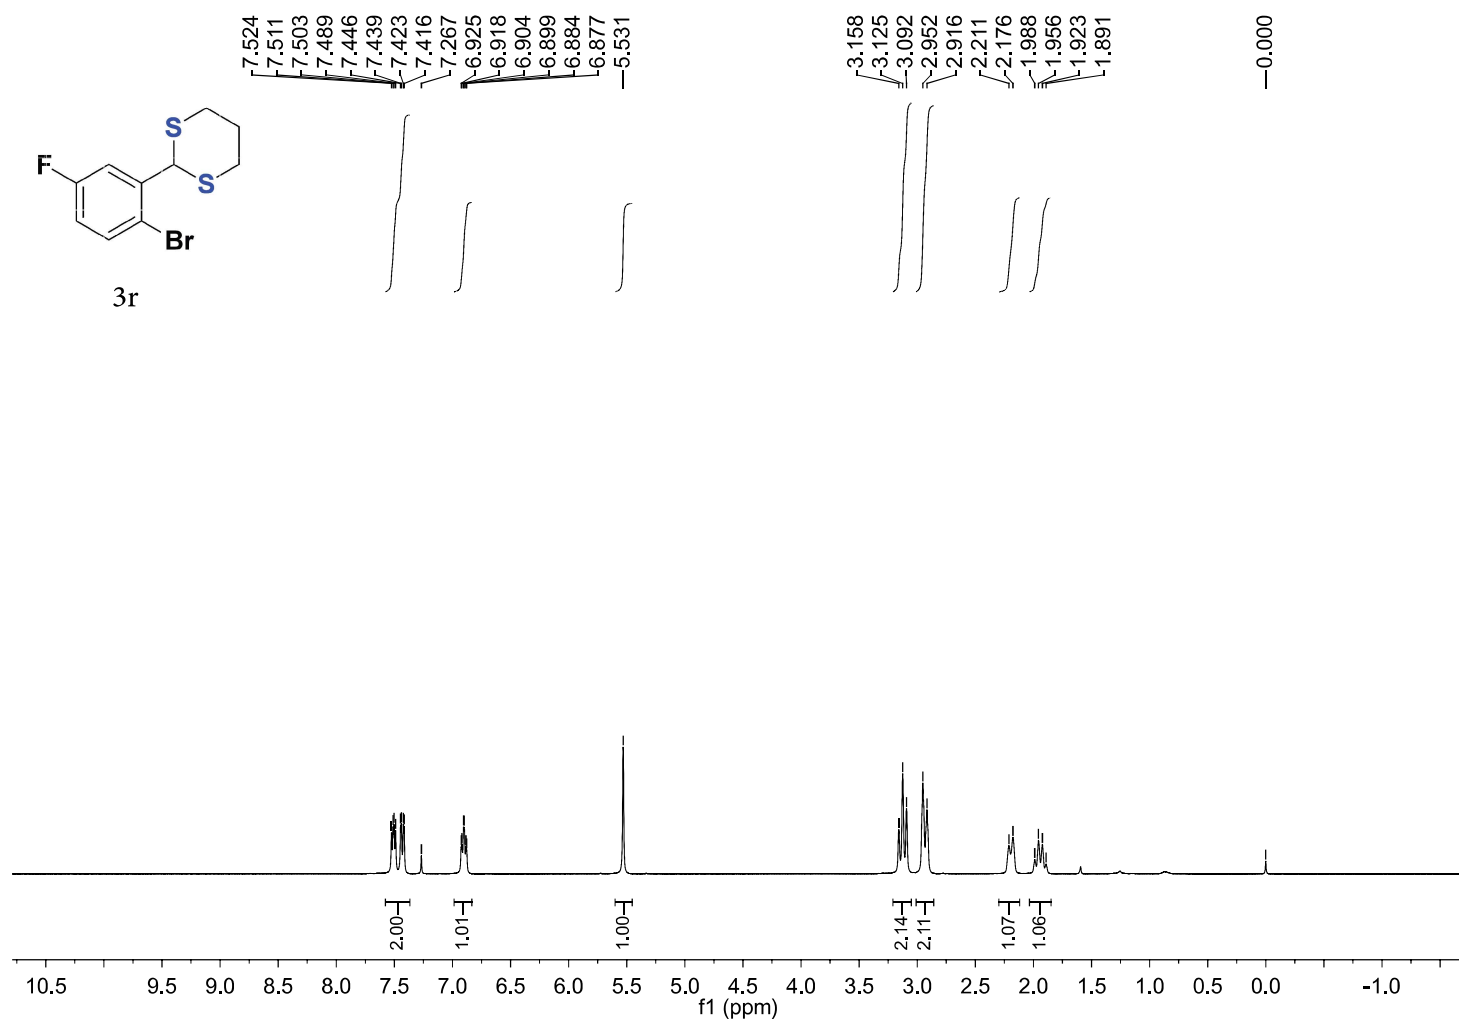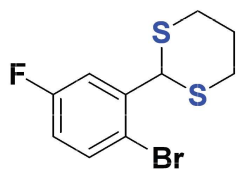

3r

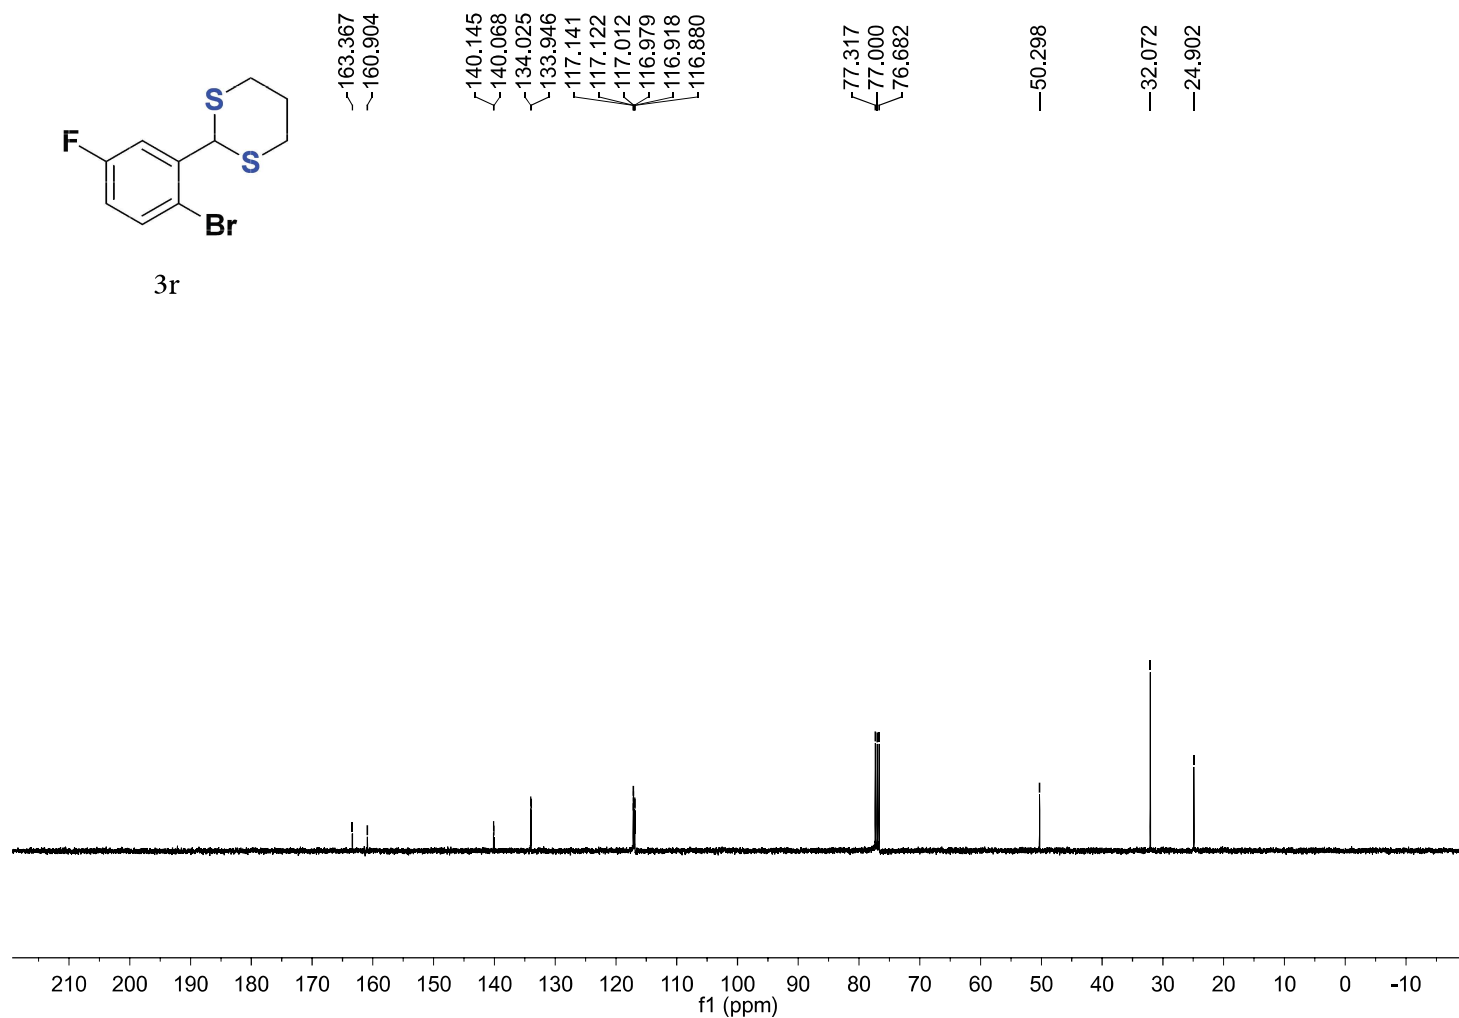

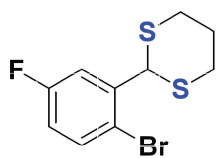

3r

—113.137

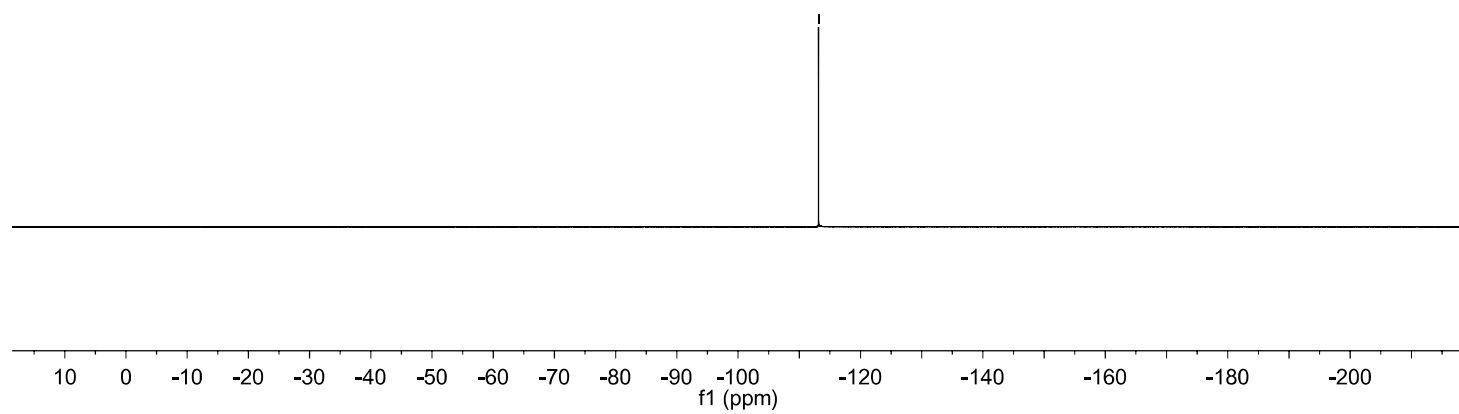





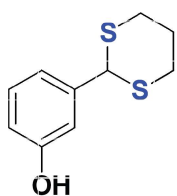

3t

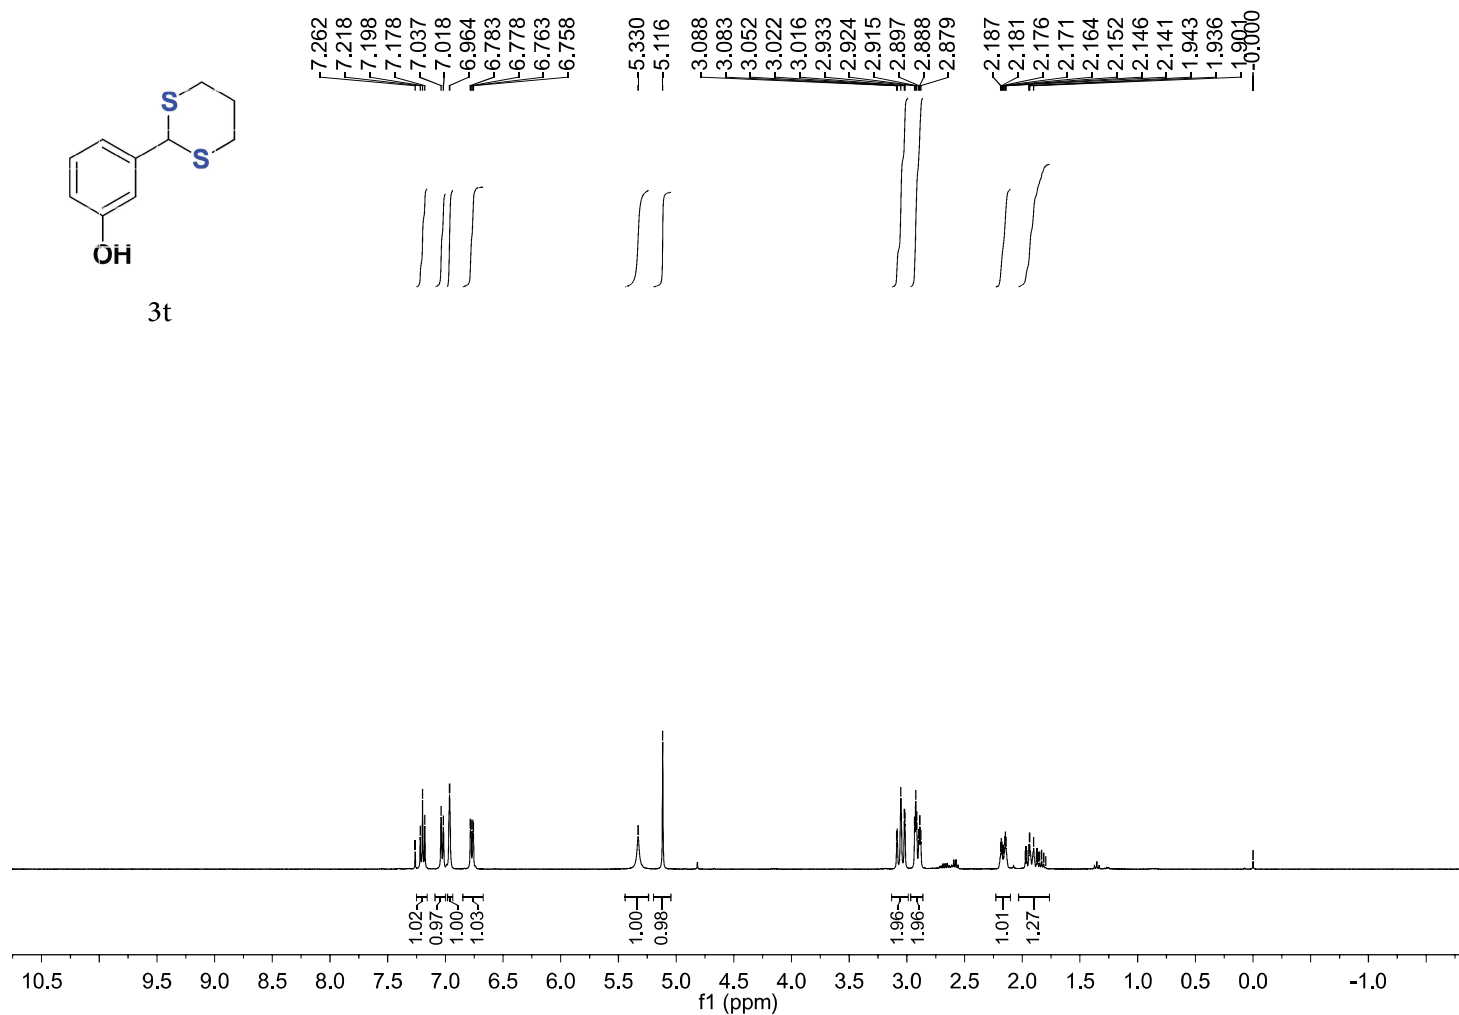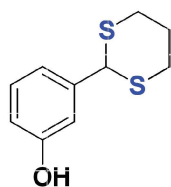

3t

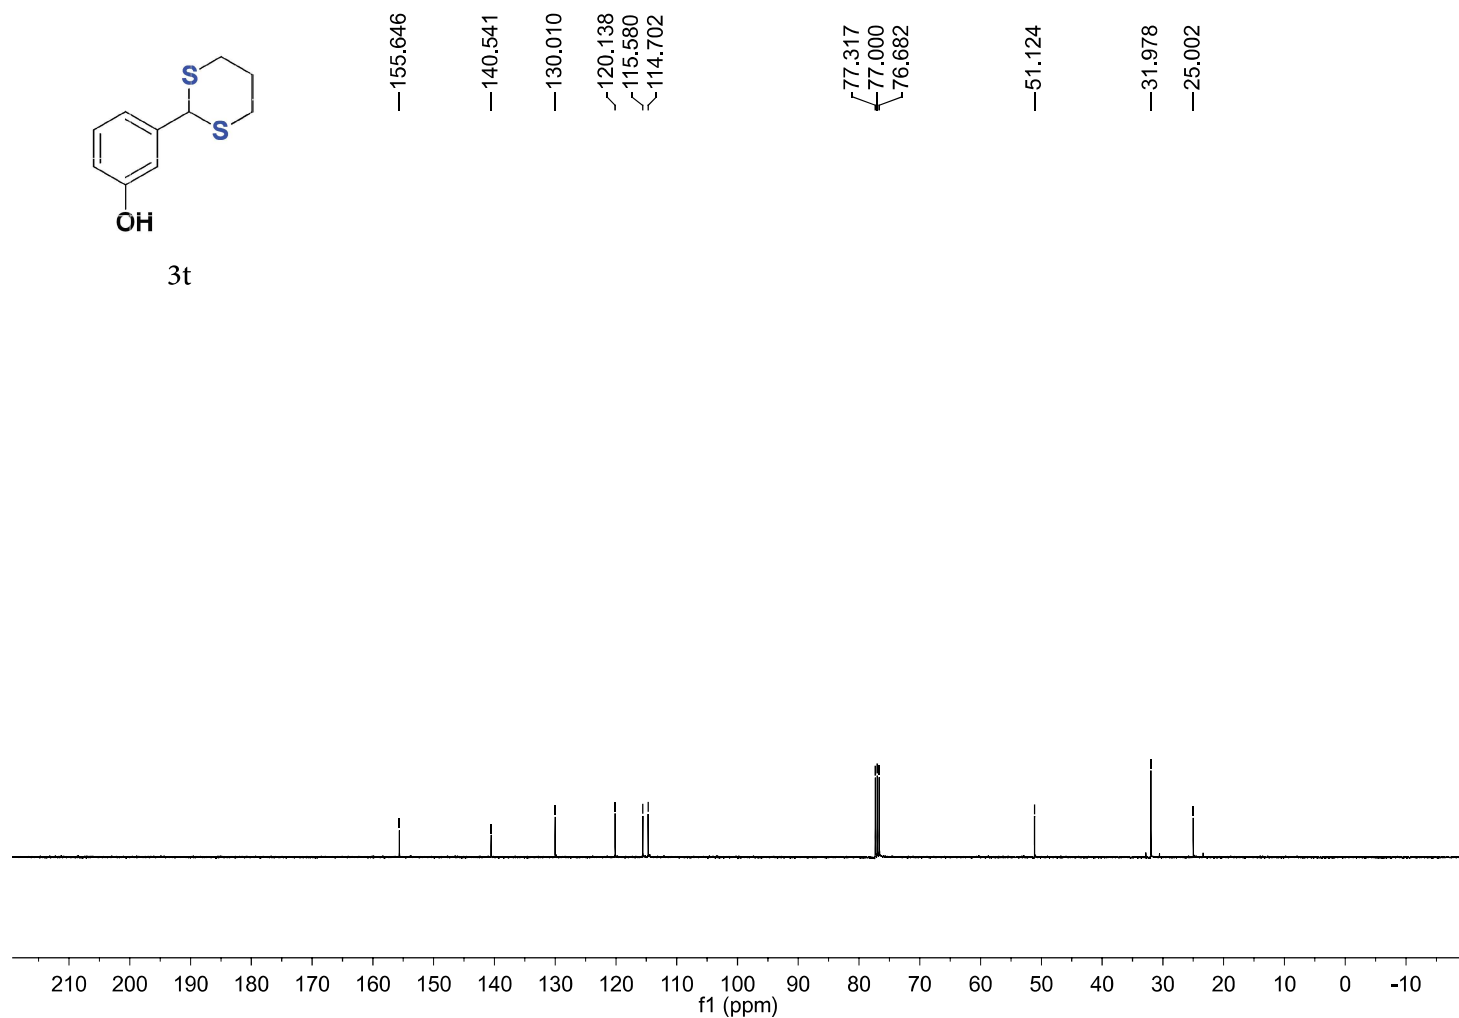

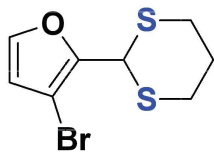

3u

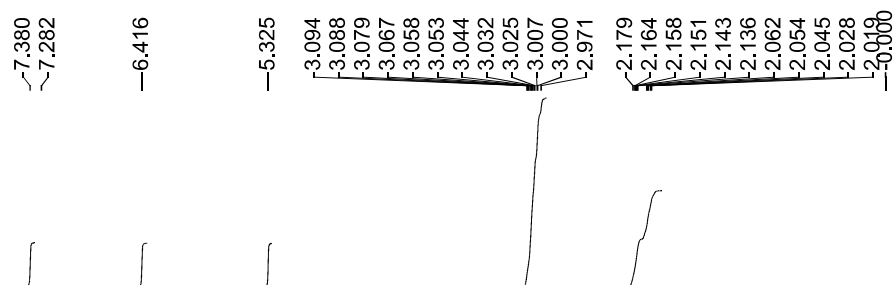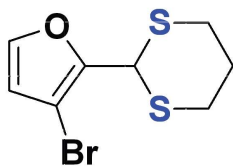

3u

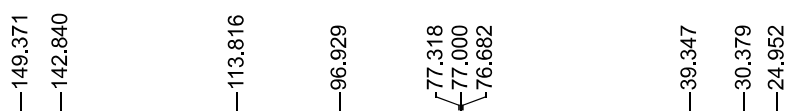

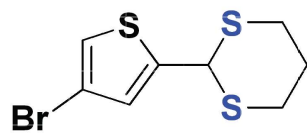

3v

7.269  
7.193  
7.190  
7.107  
5.255  
2.994  
2.986  
2.968  
2.959  
2.950  
2.941  
2.933  
2.914  
2.907  
2.894  
2.878  
2.872  
2.154  
2.145  
2.136  
2.127  
2.119  
2.111  
2.004  
1.994  
1.982  
1.971  
1.959  
0.000

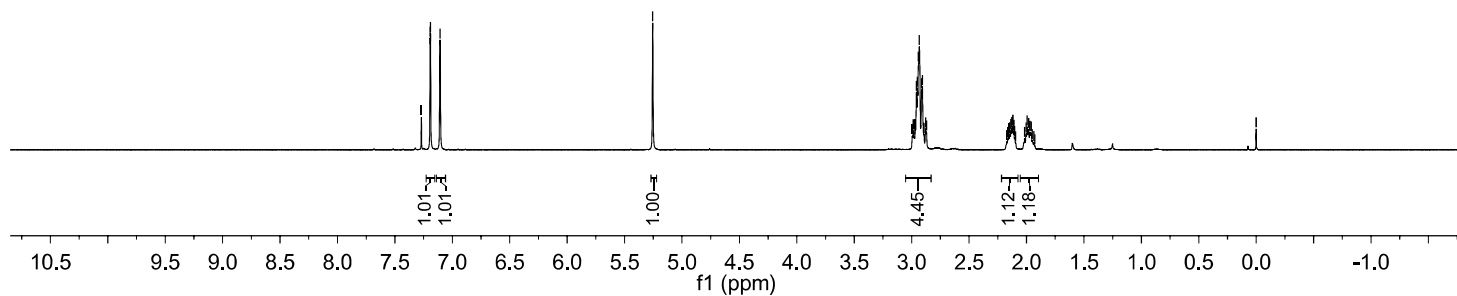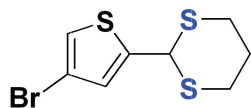

3v

144.565  
129.079  
123.268  
109.138  
77.317  
77.000  
76.683  
43.459  
29.781  
24.860

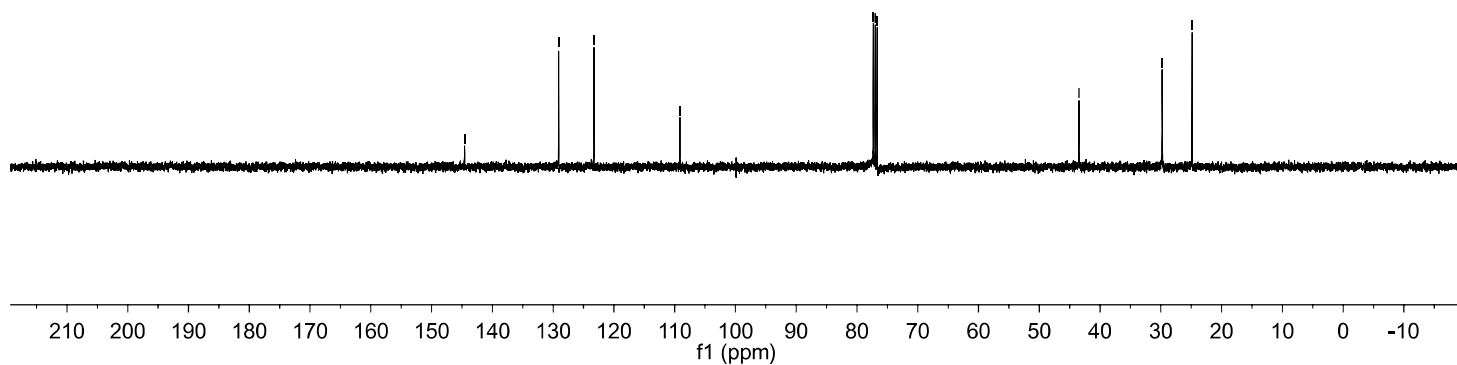

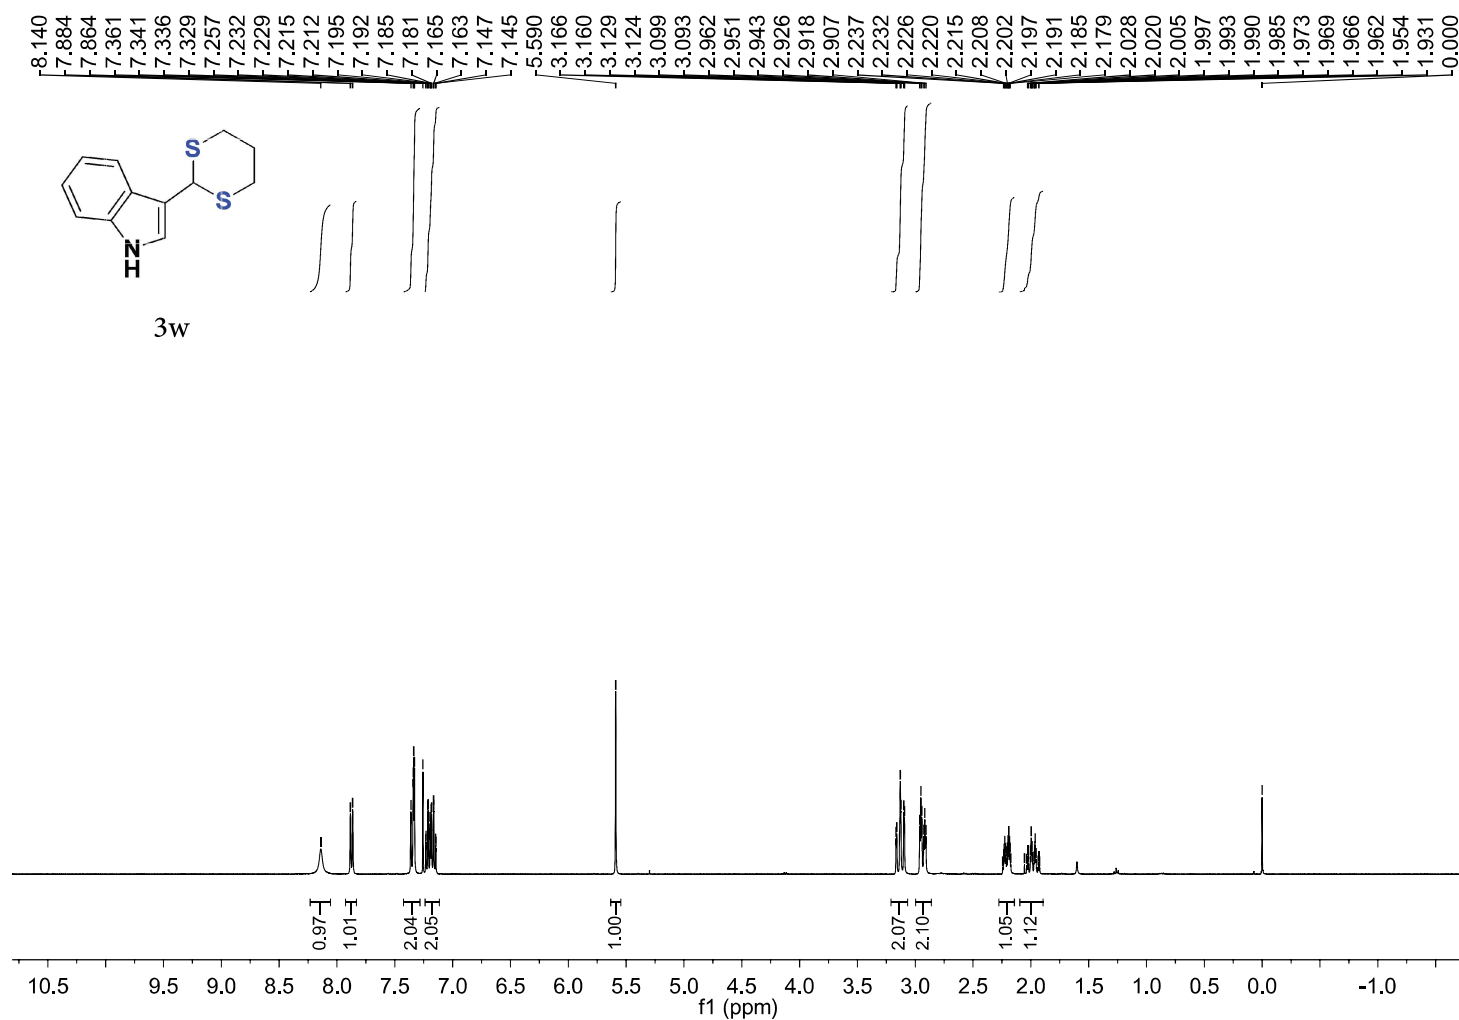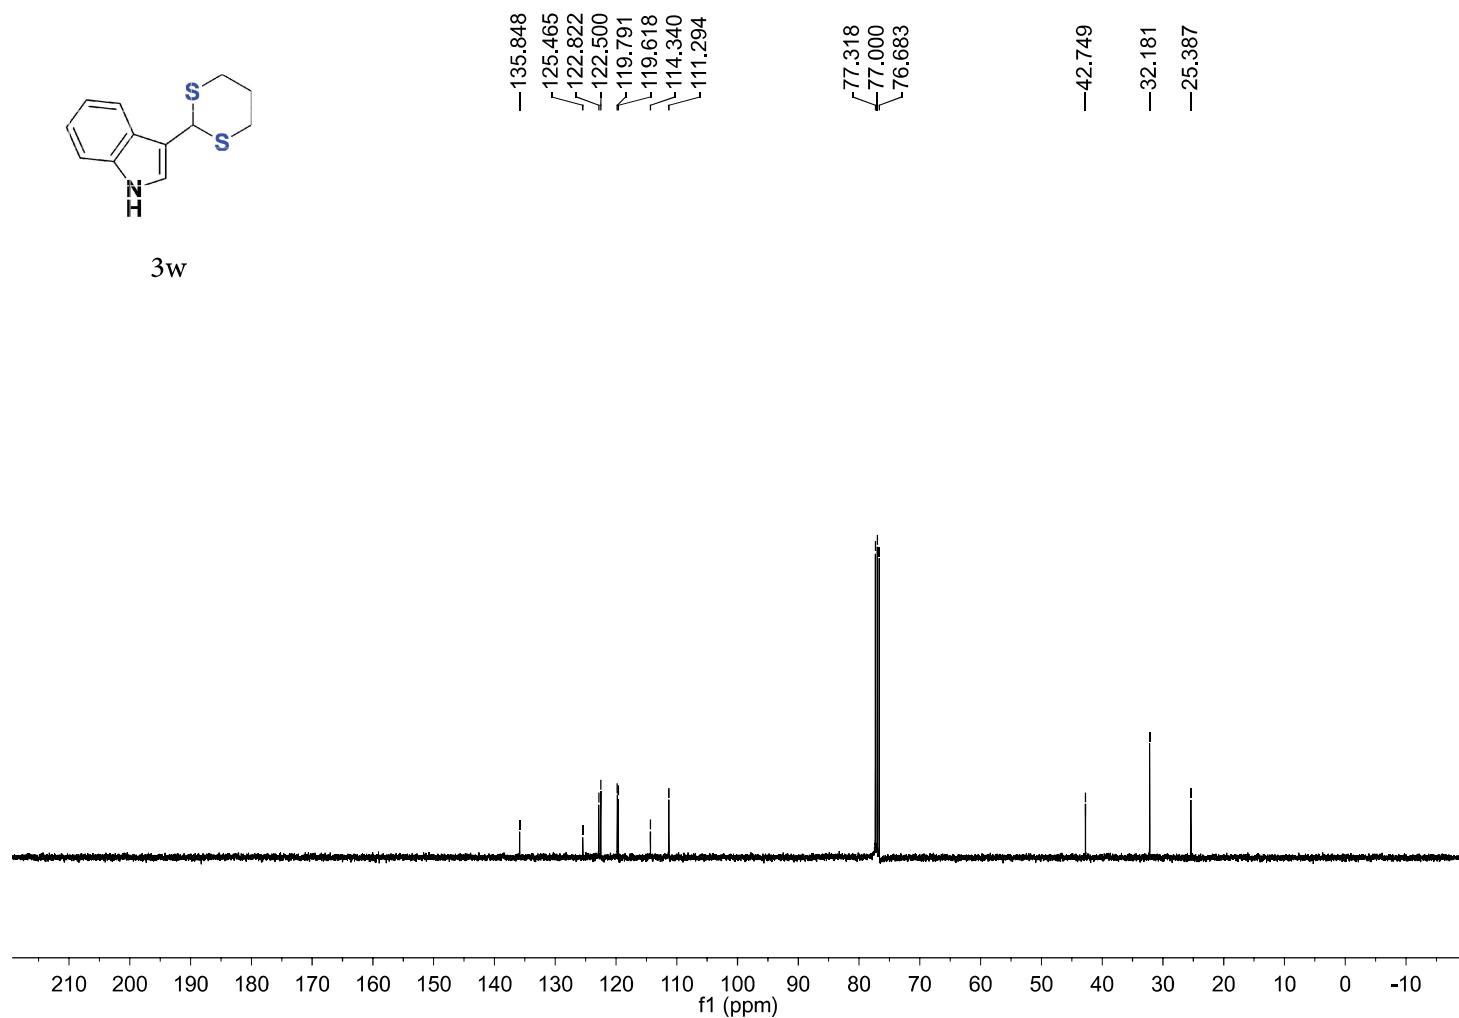

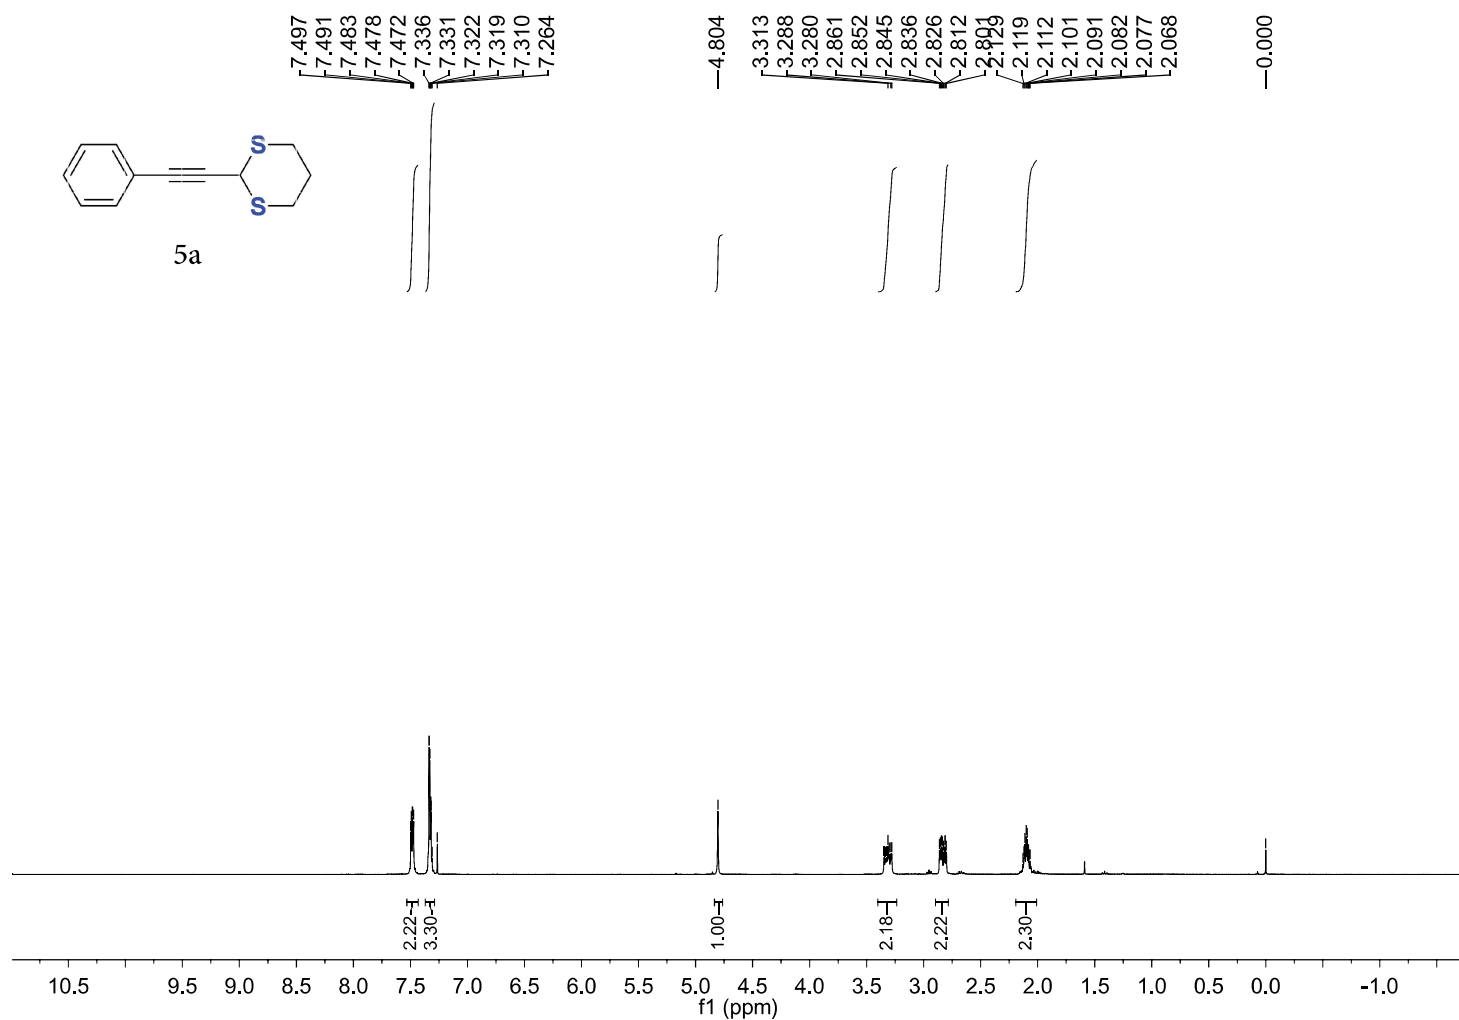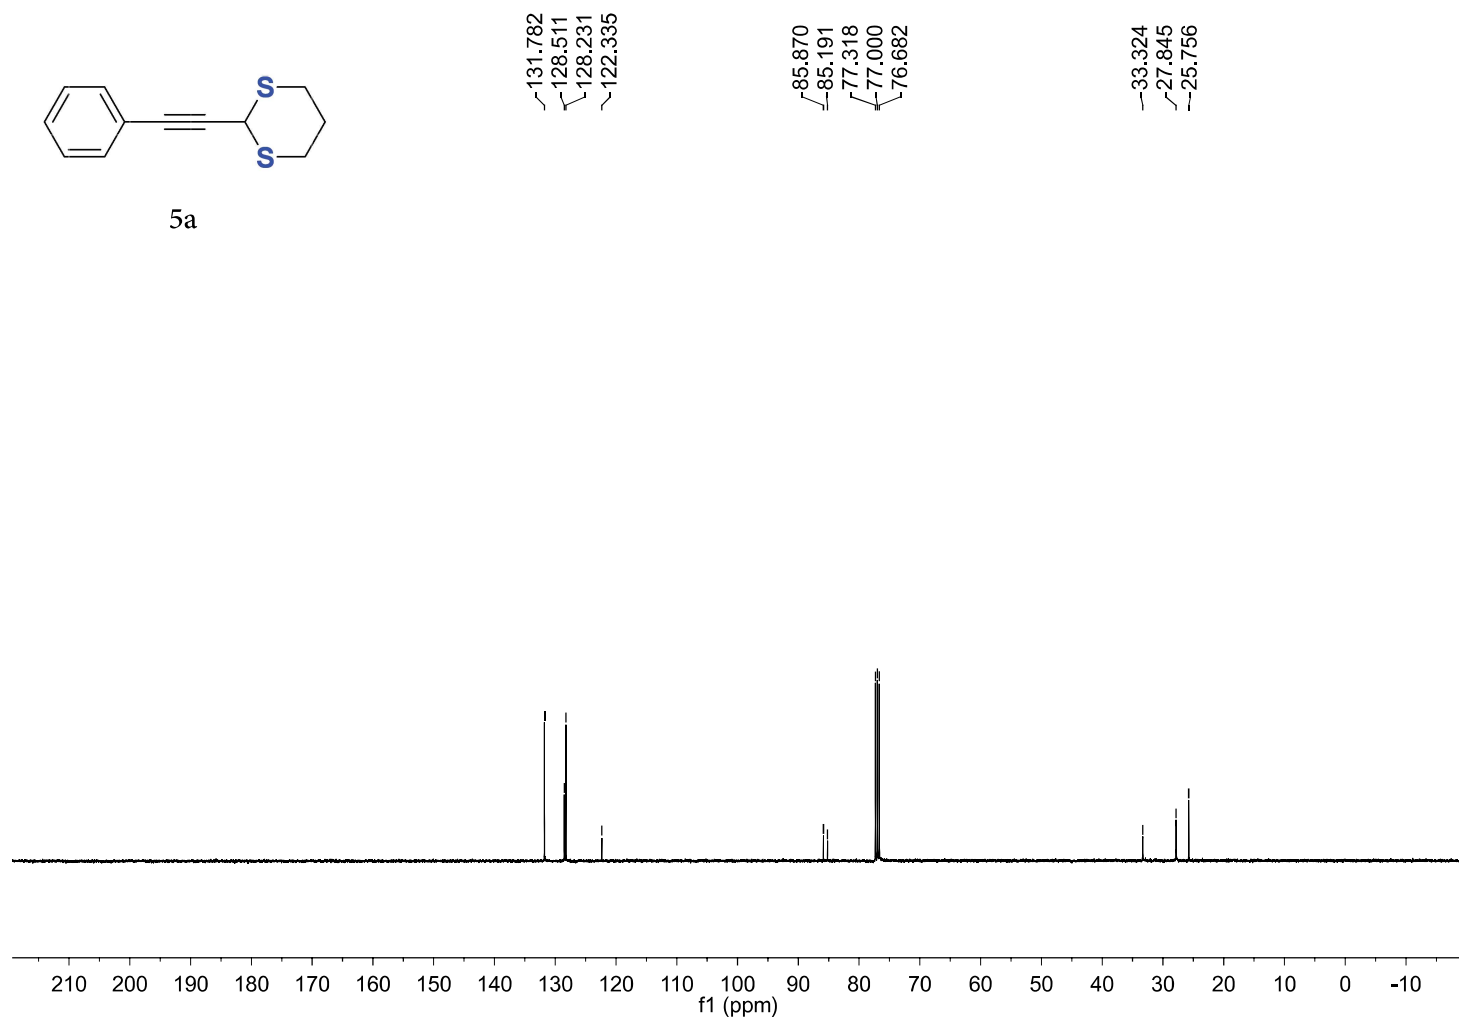

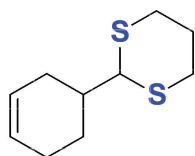

5b

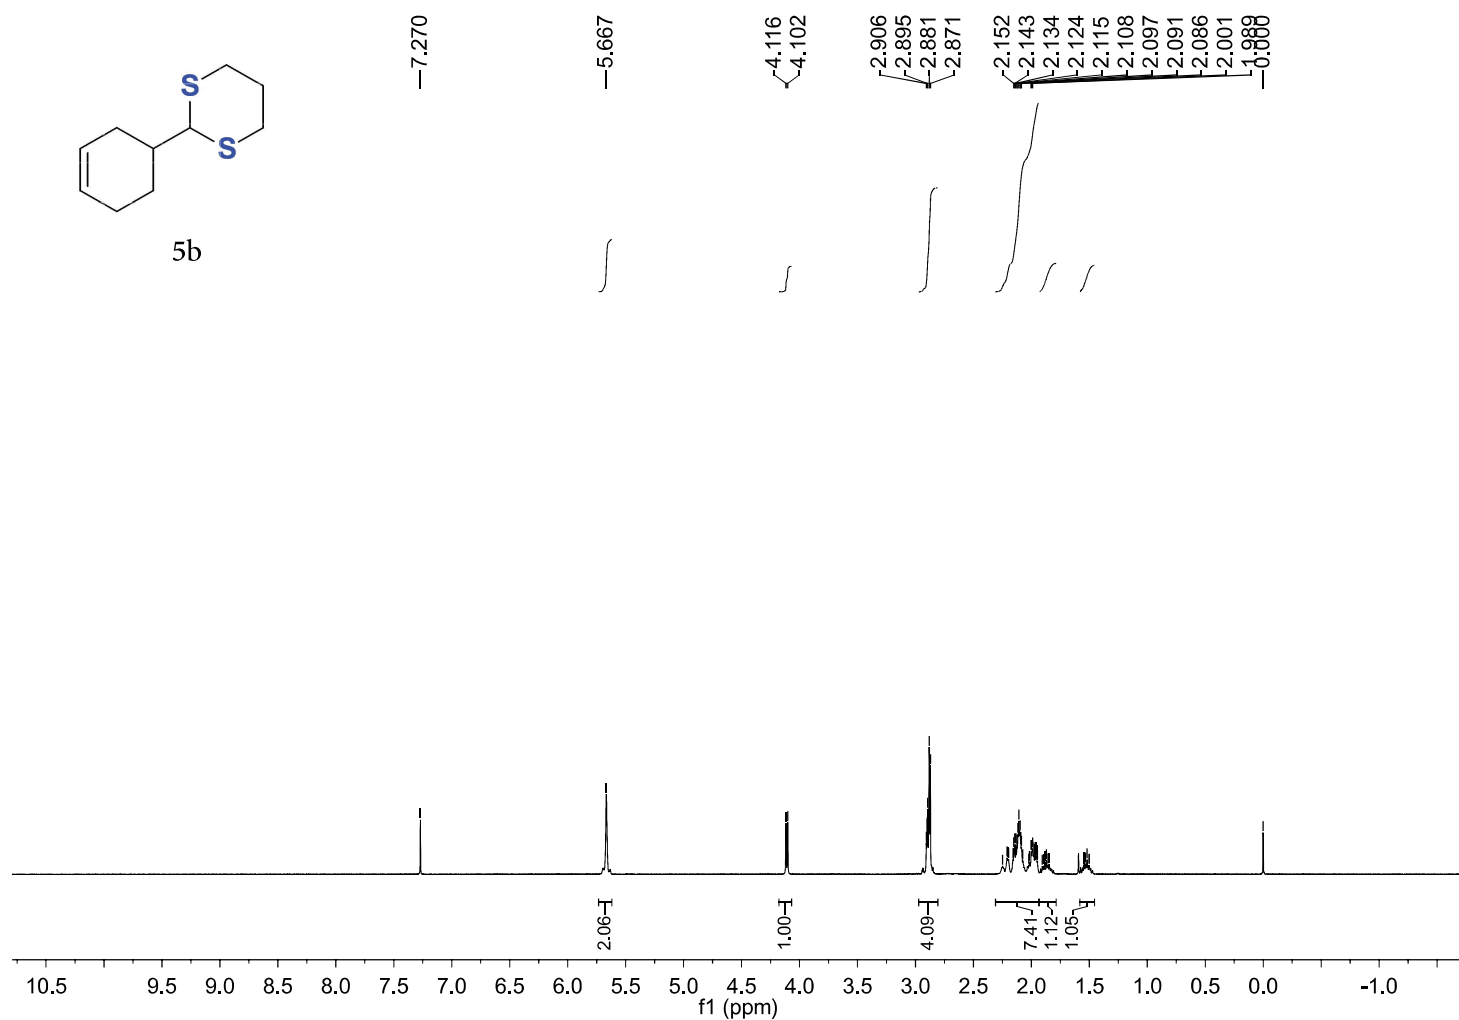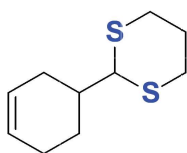

5b

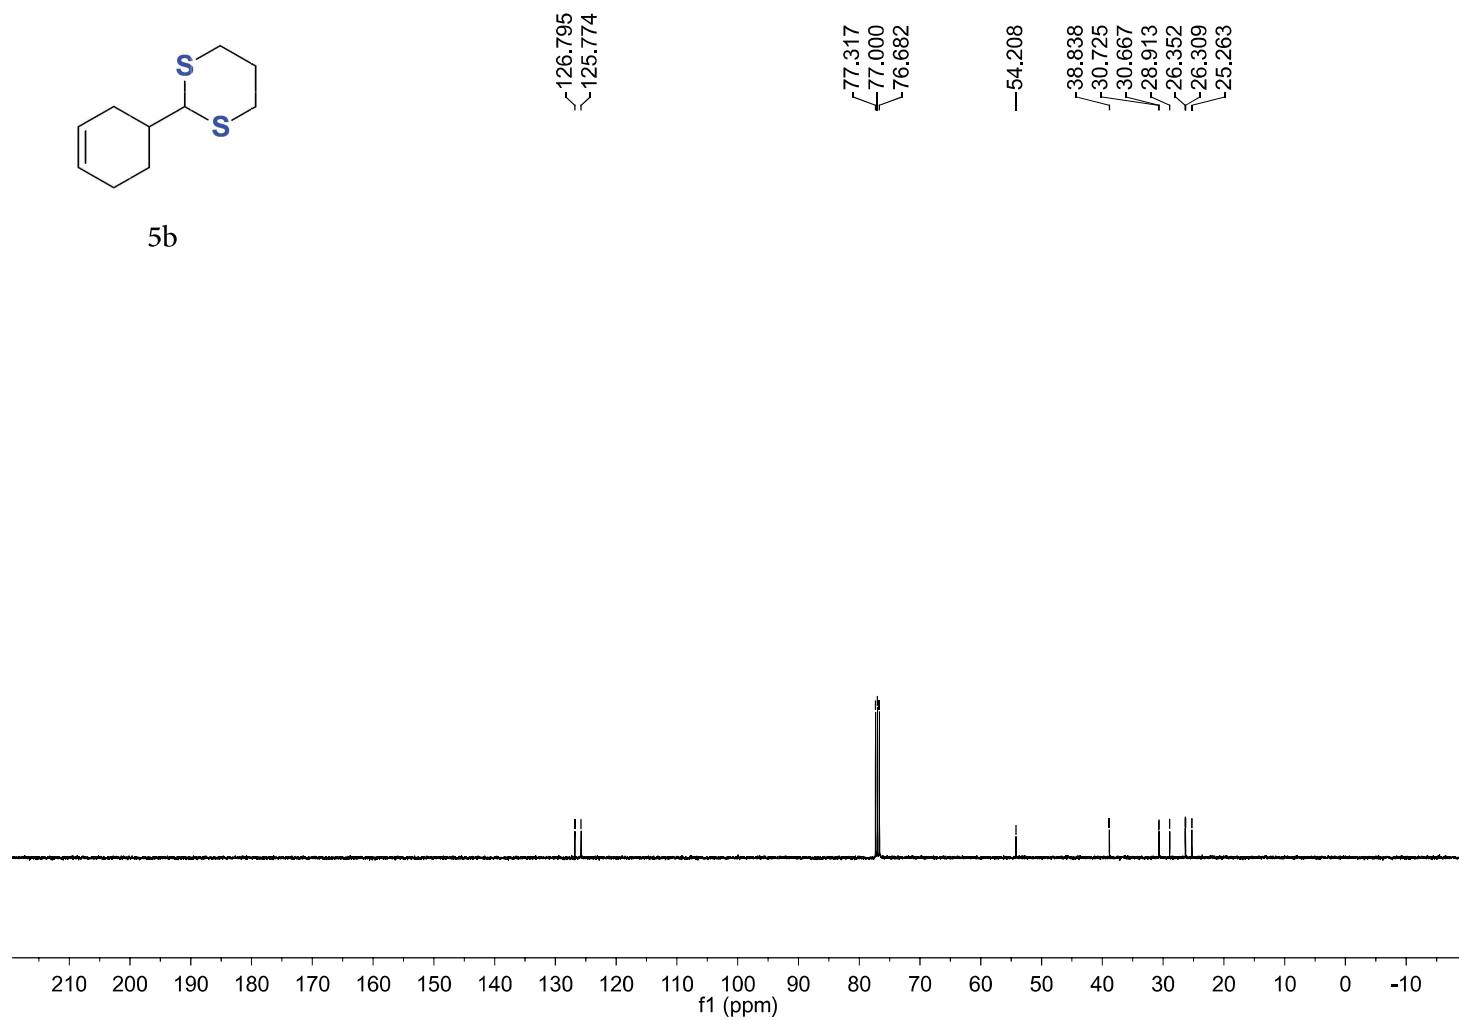

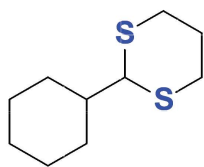

5c

—7.281

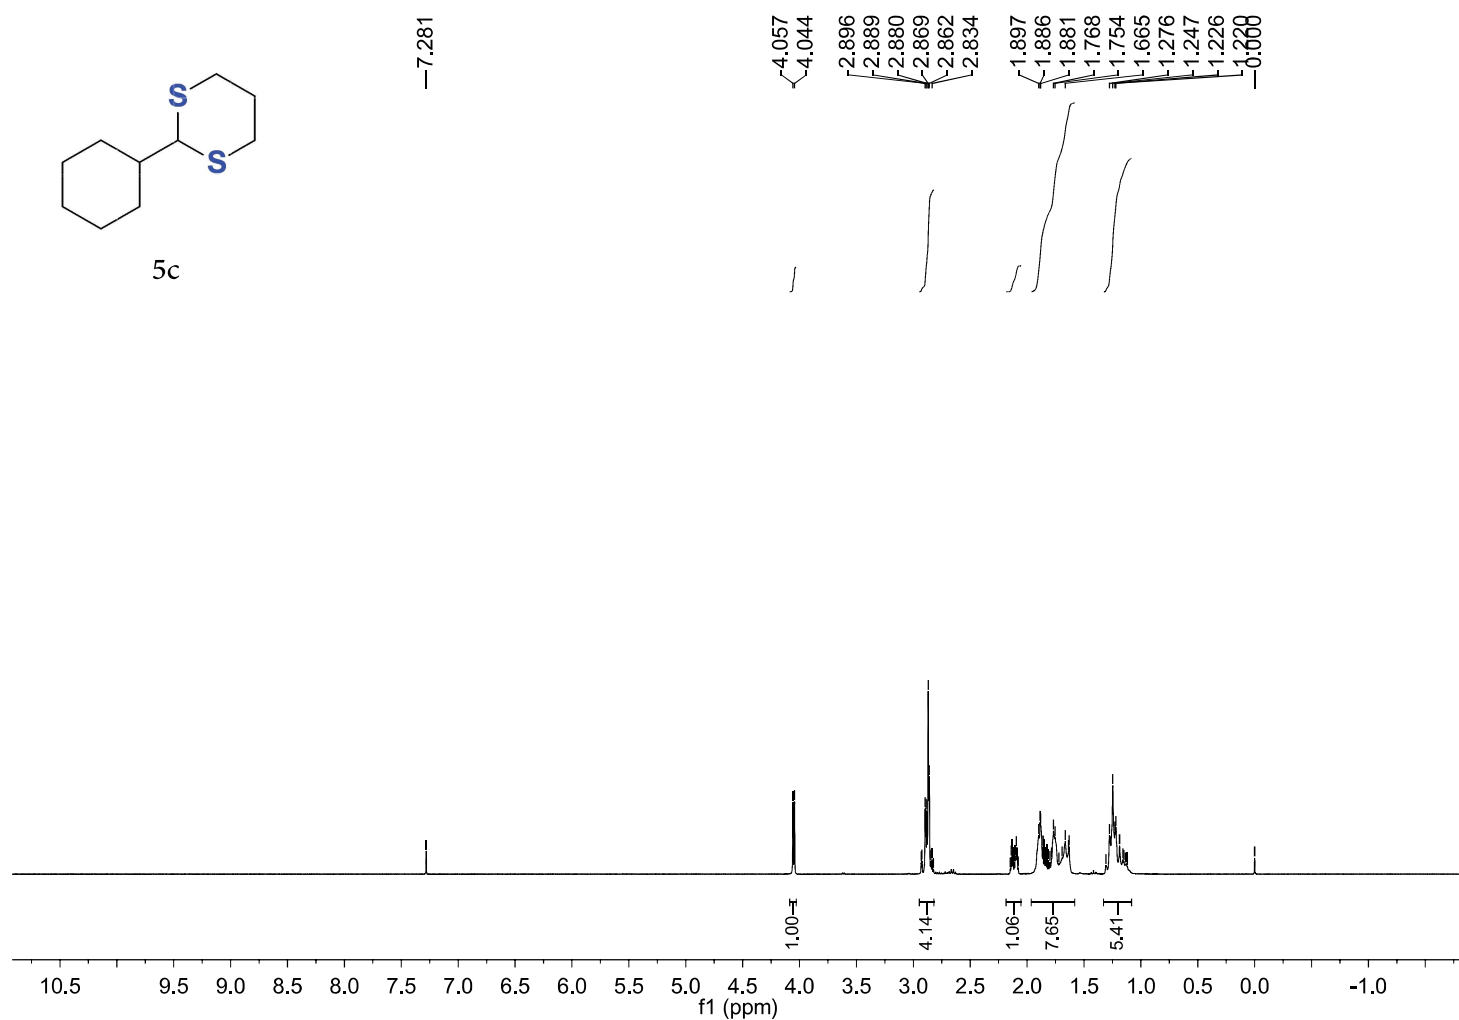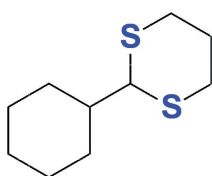

5c

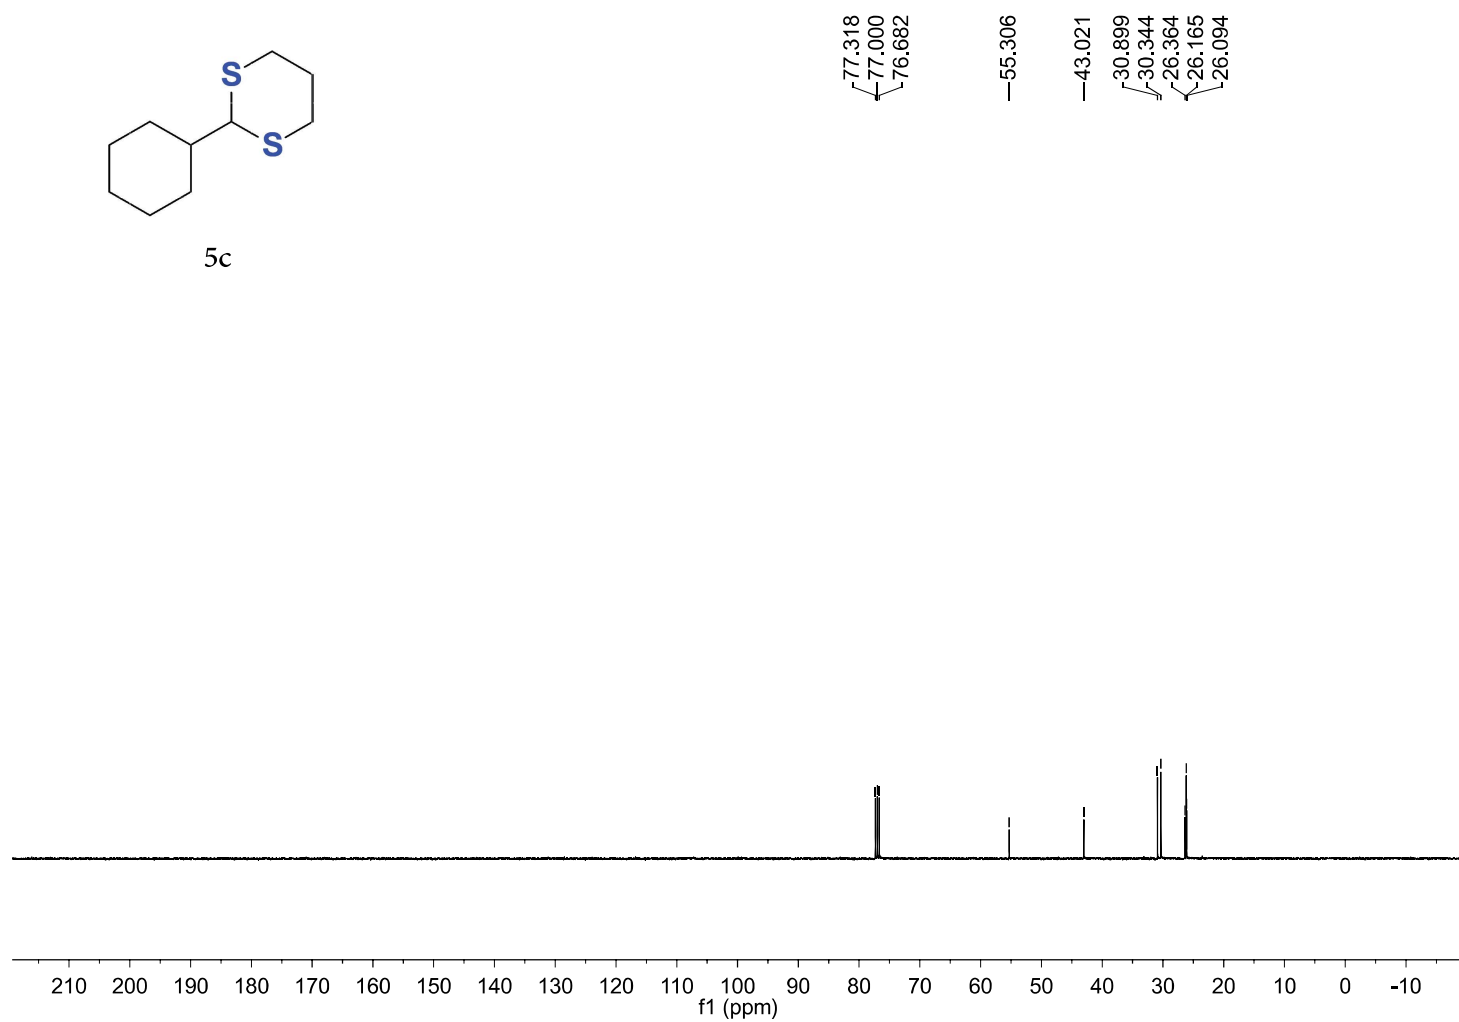

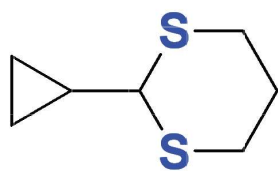

5d

—7.280

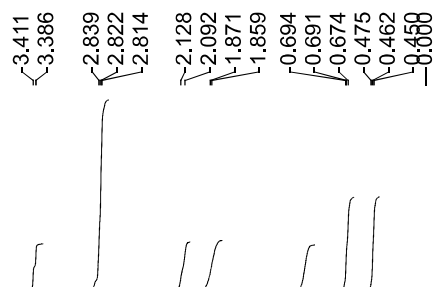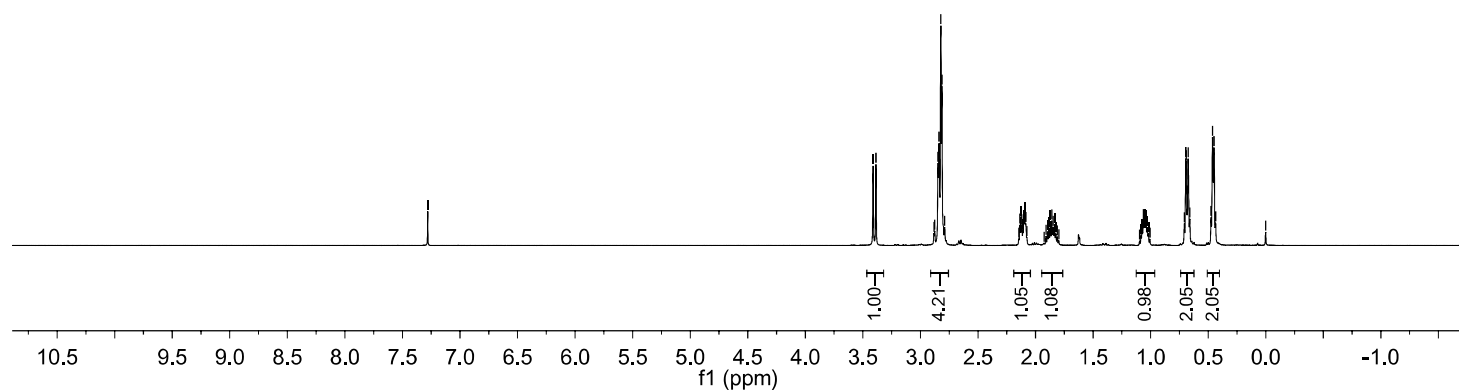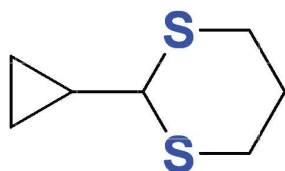

5d

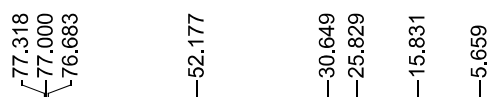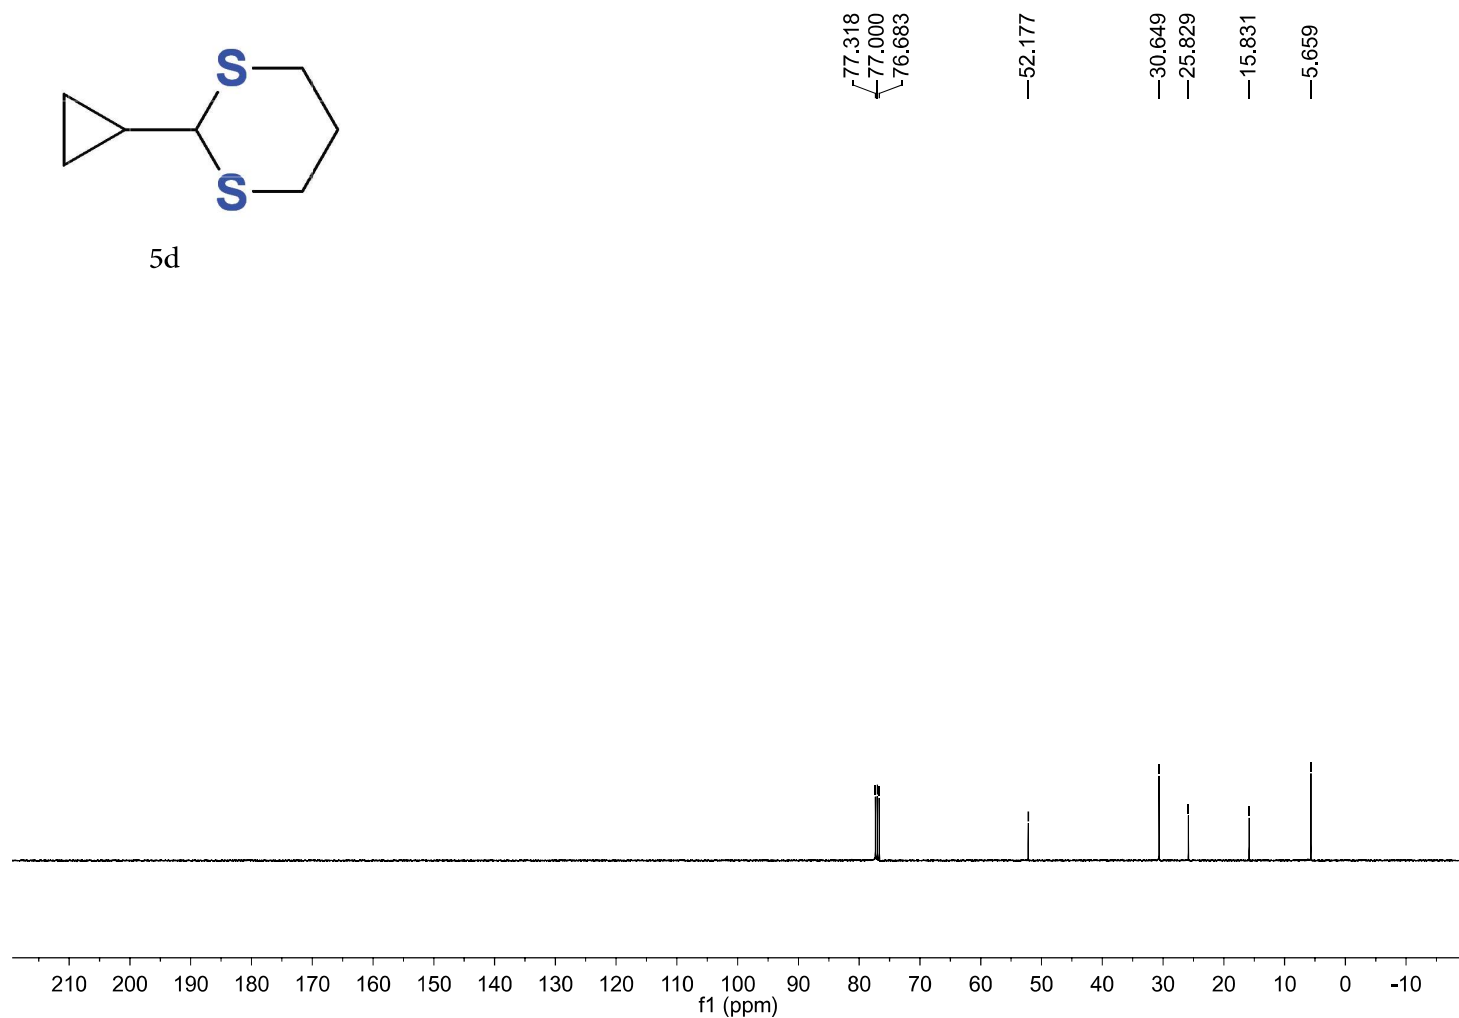



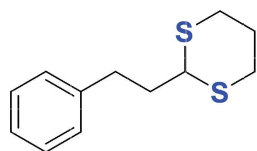

5e

7.310  
7.290  
7.279  
7.273  
7.248  
7.221  
7.202  
7.183  
4.006  
3.988  
3.971  
2.848  
2.832  
2.823  
2.811  
2.125  
2.116  
2.096  
2.091  
2.078  
2.058  
2.040  
1.883  
1.869  
1.859  
1.847  
0.806

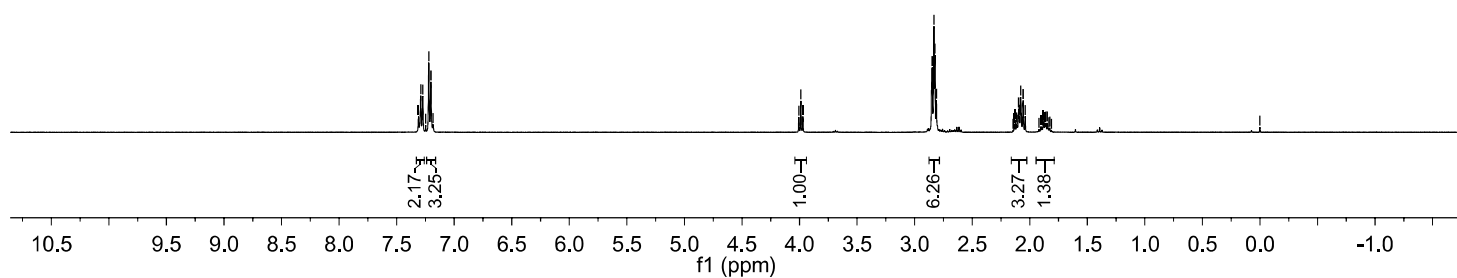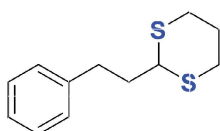

5e

140.760  
128.421  
128.338  
125.976  
77.317  
77.000  
76.682  
46.445  
36.811  
32.376  
30.141  
25.906

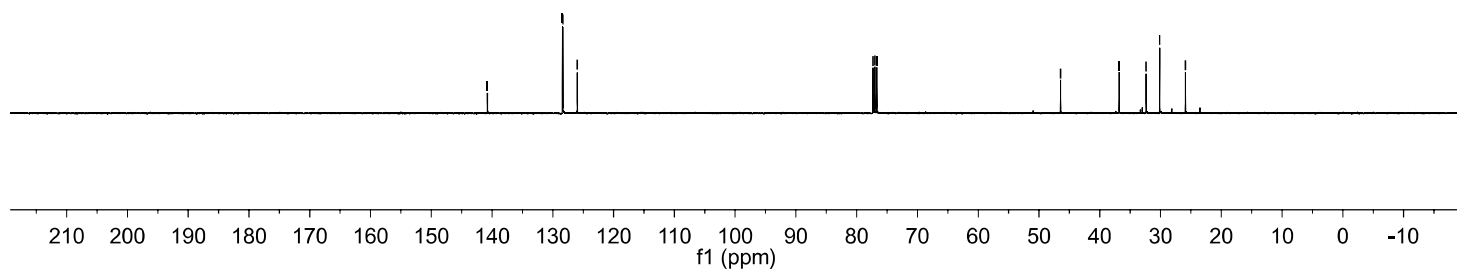

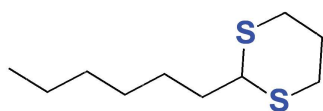

5f

—7.291

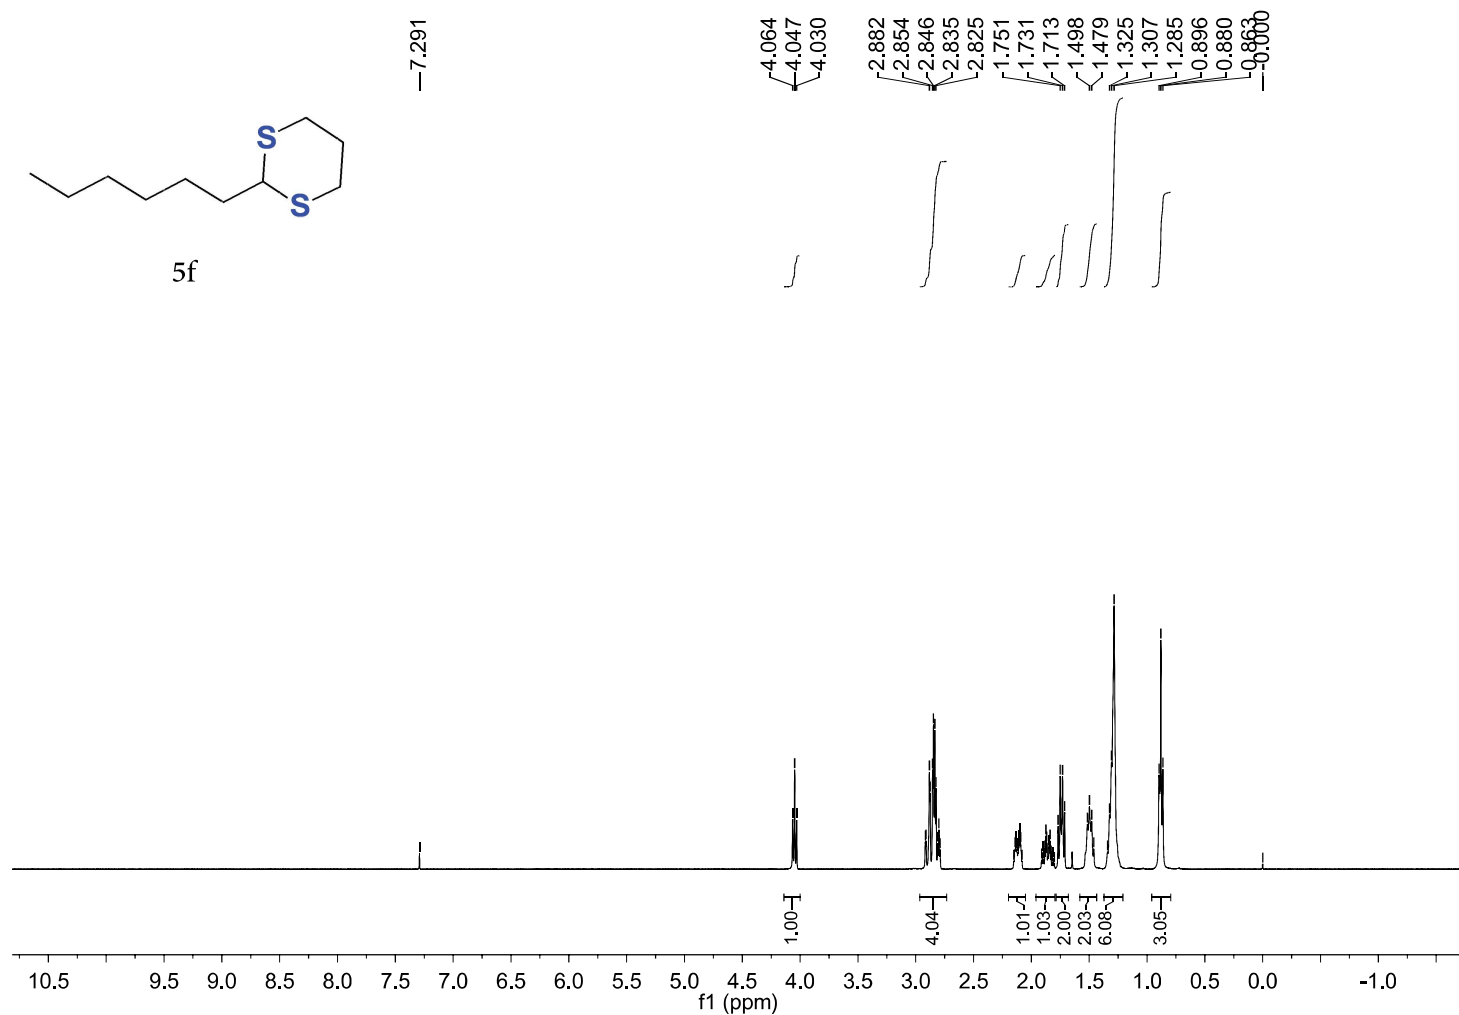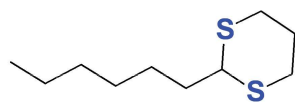

5f

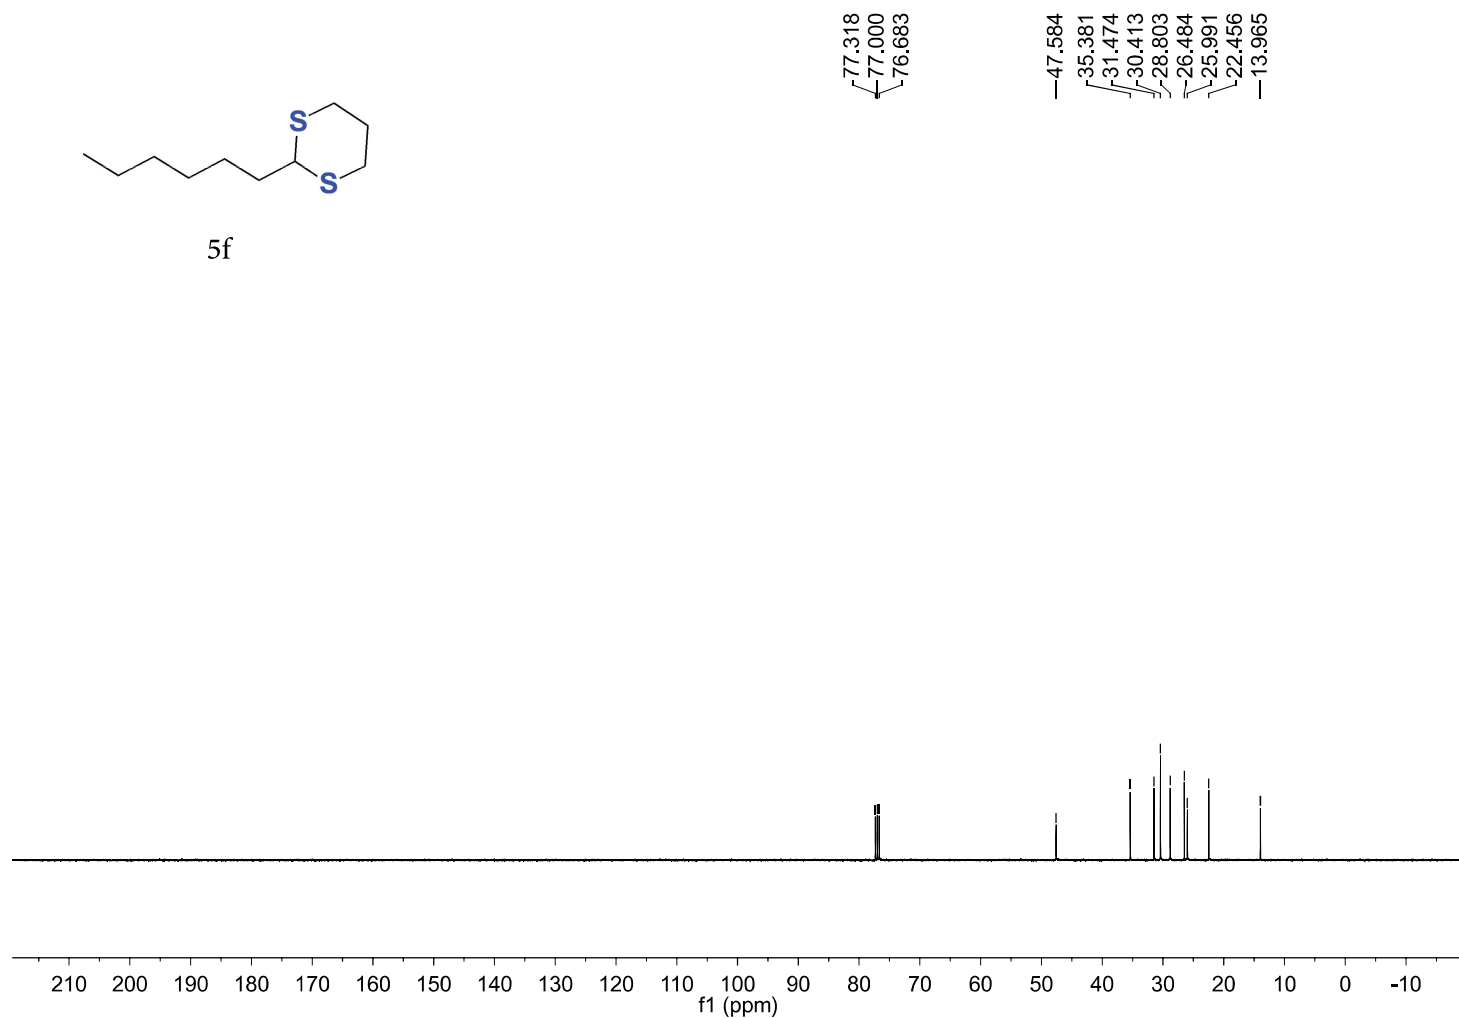

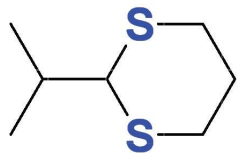

5g

—7.292

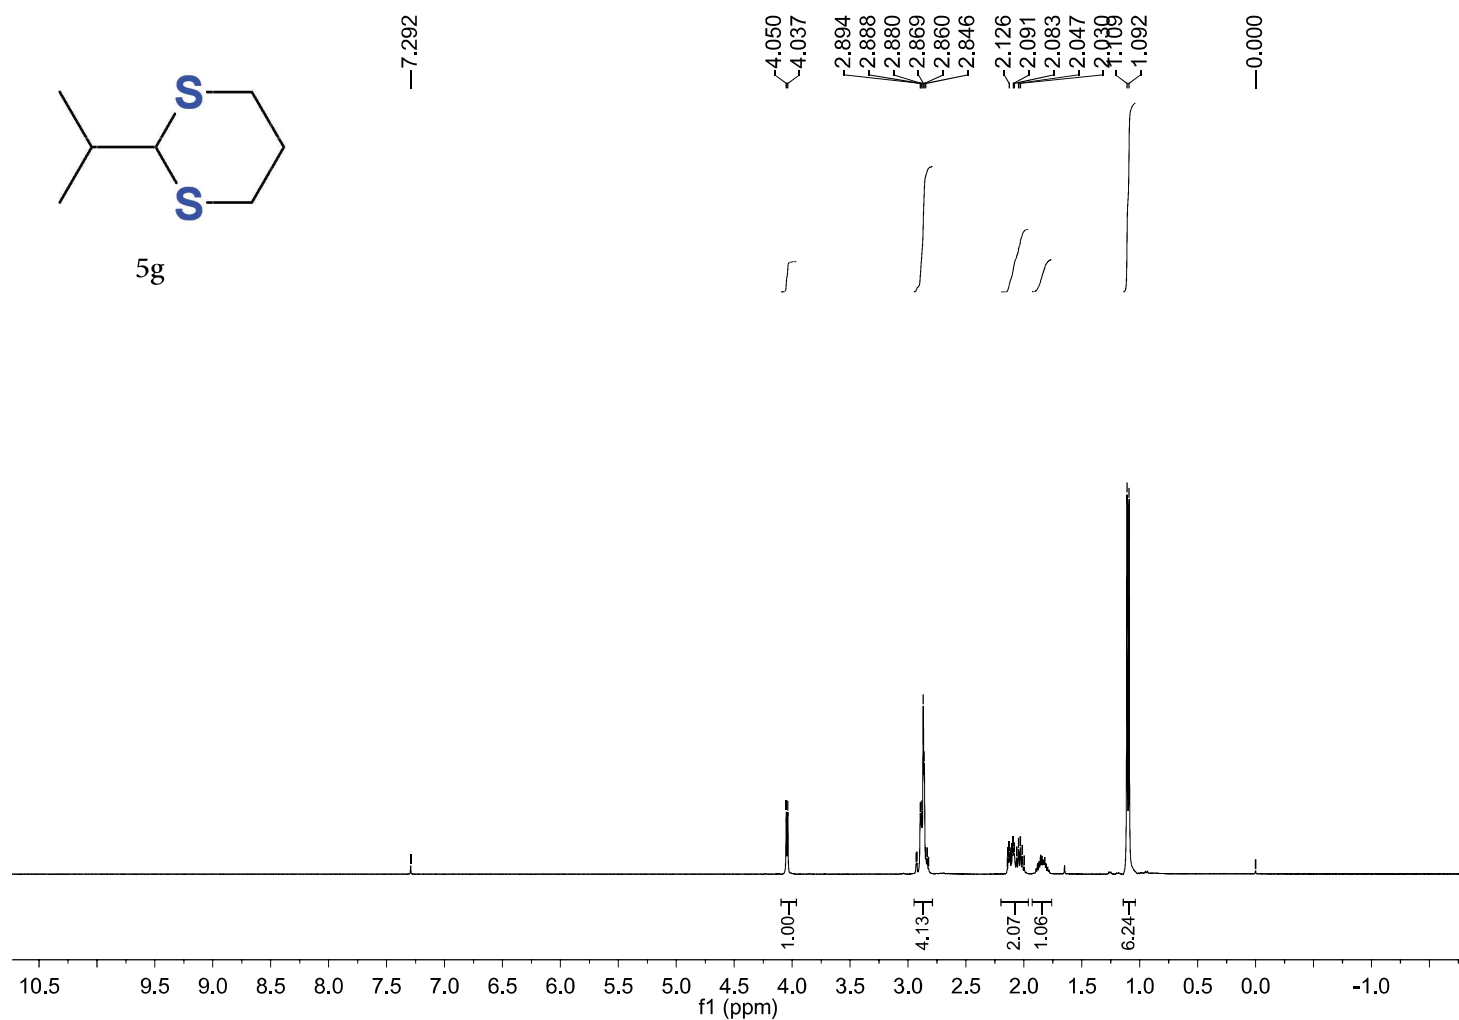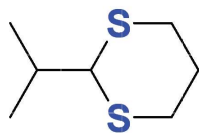

5g

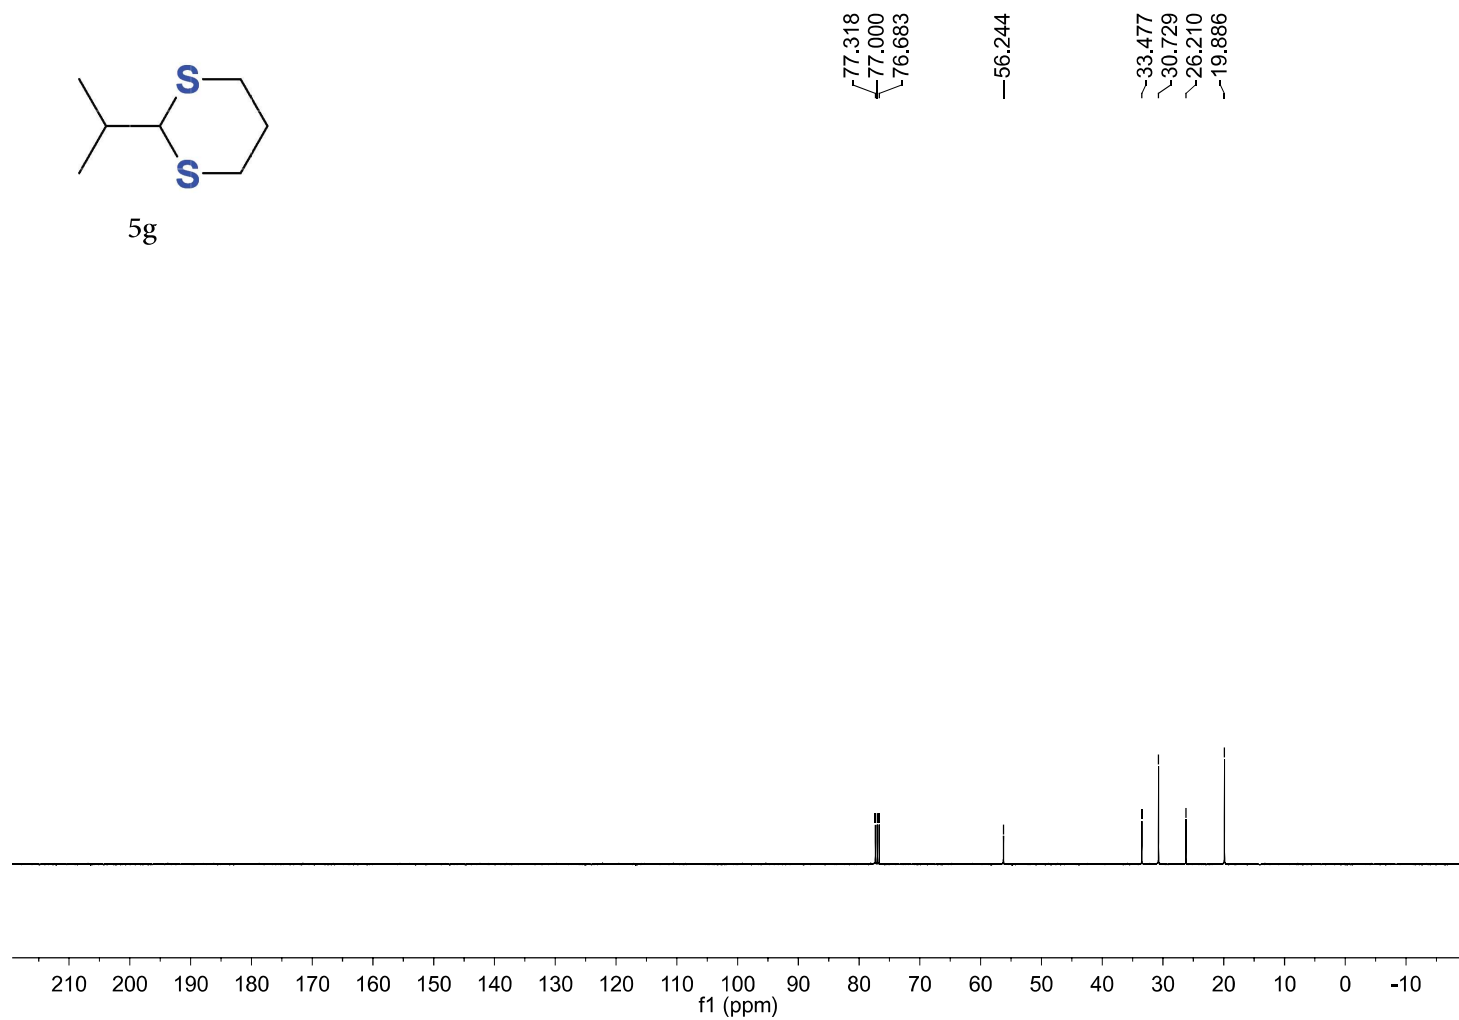

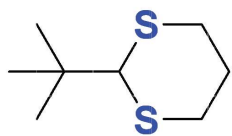

5h

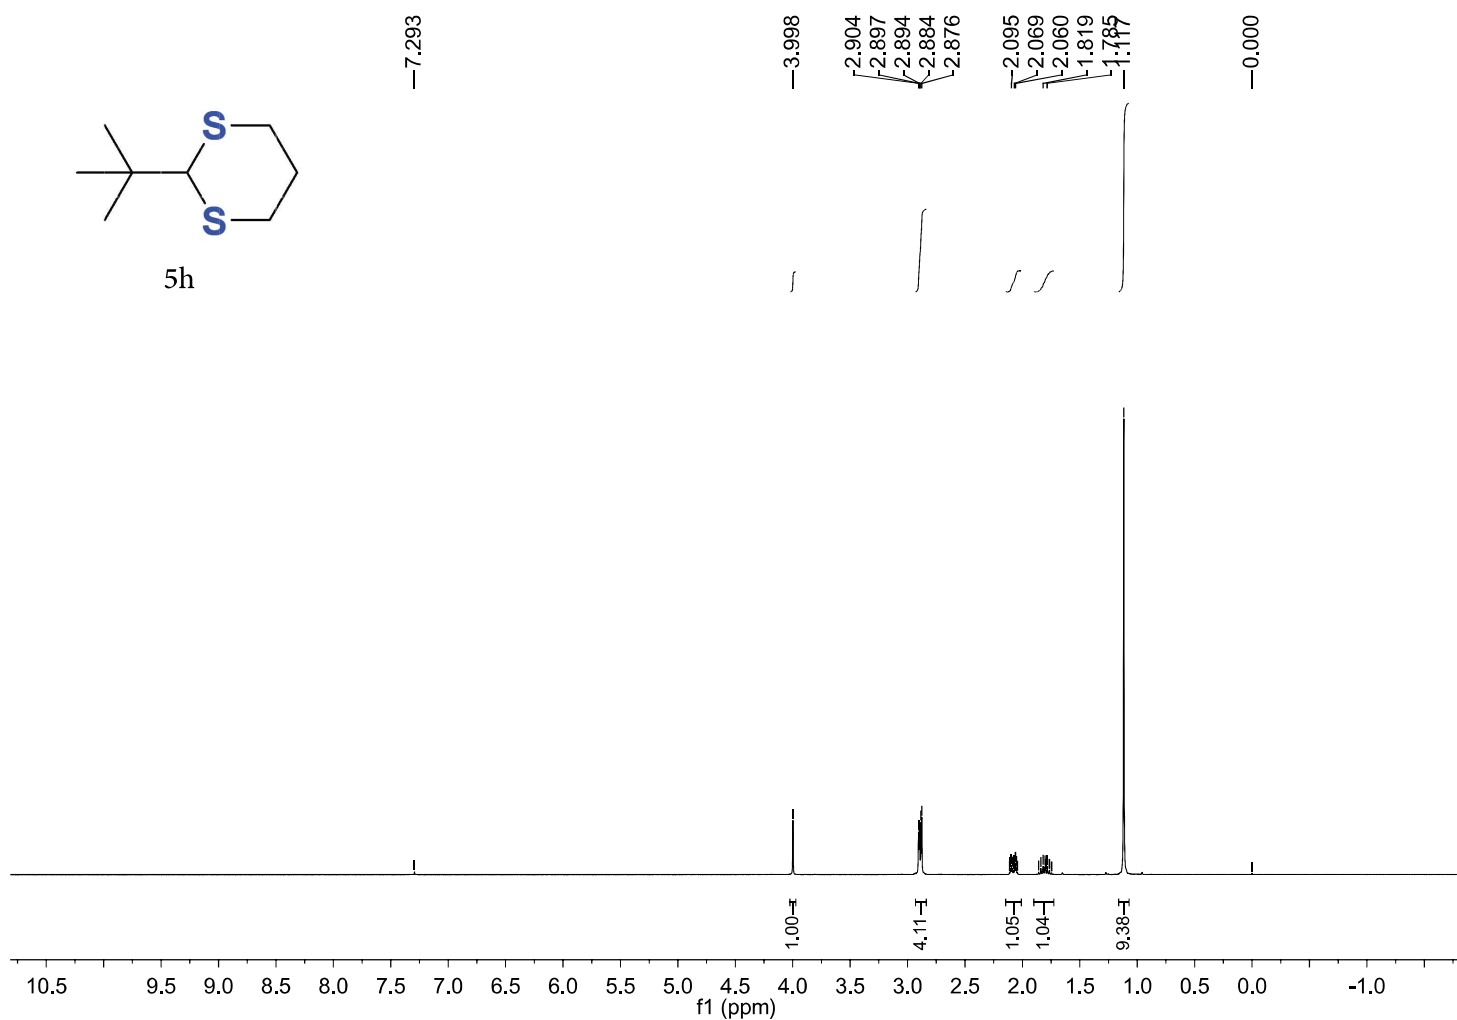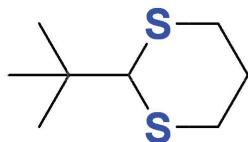

5h

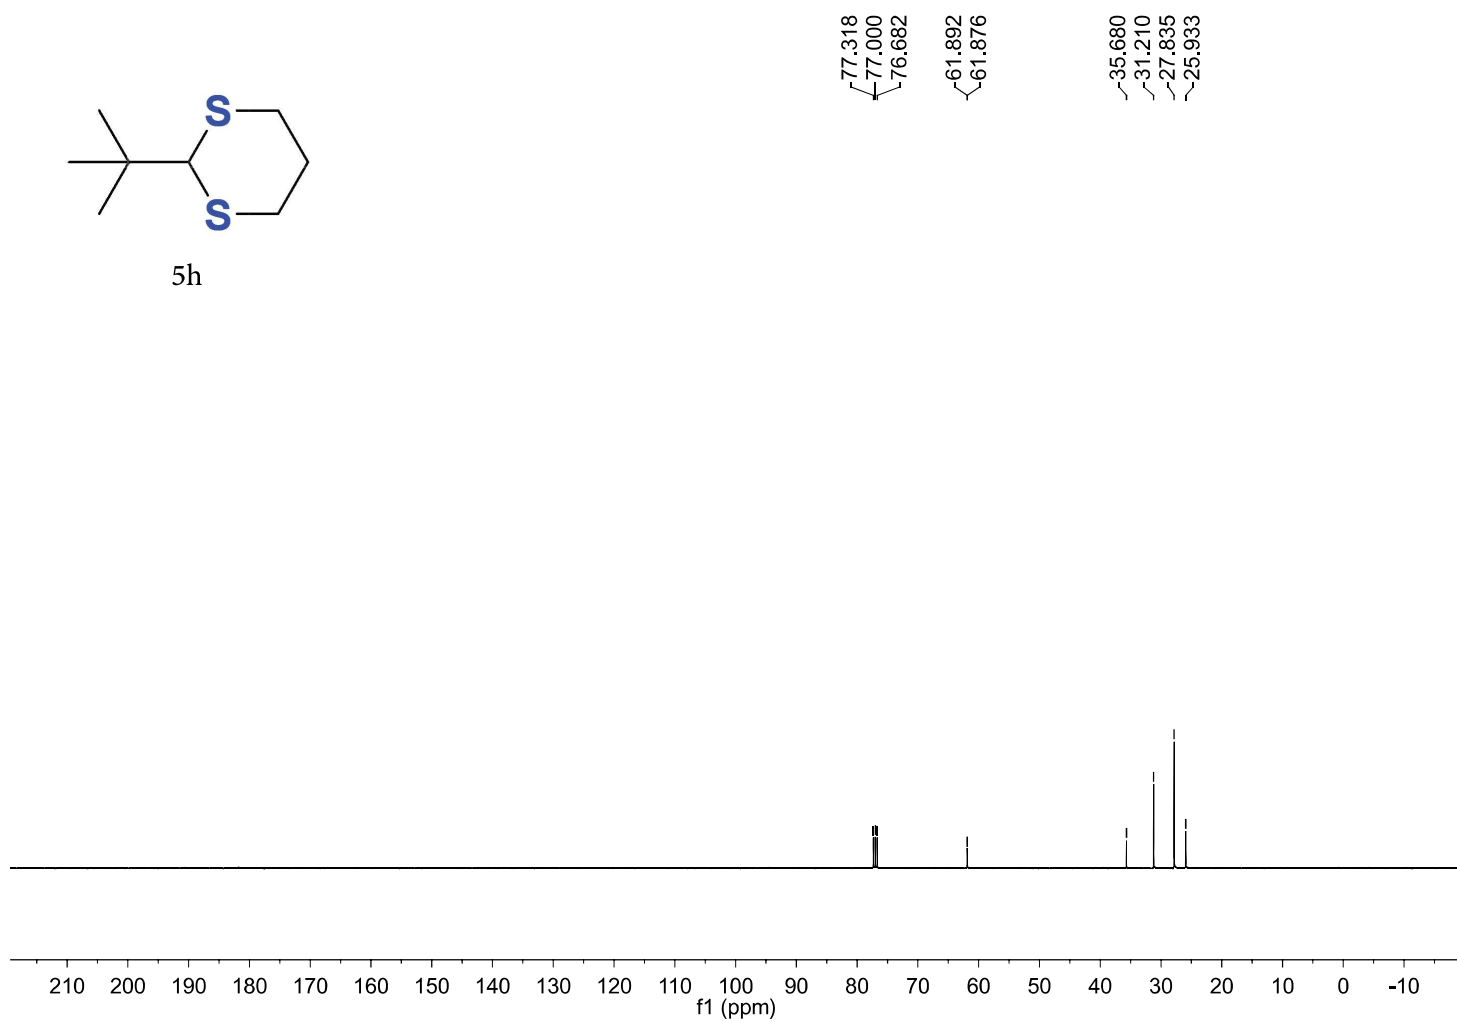

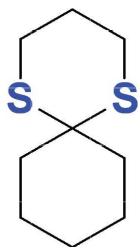

5i

—7.286

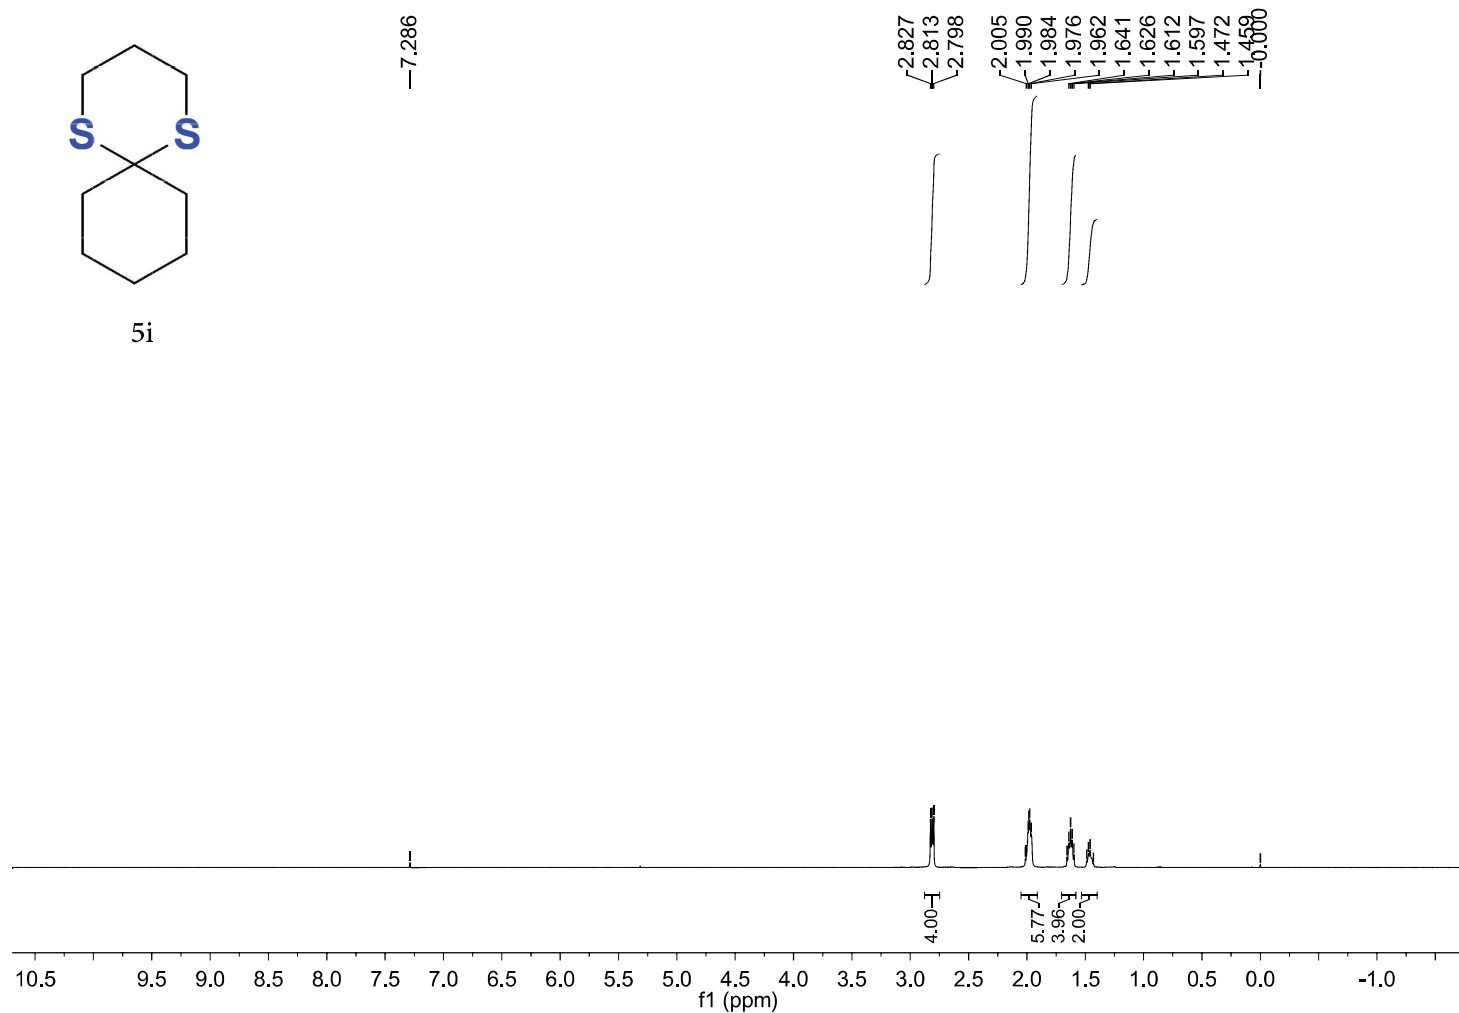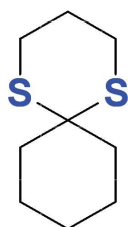

5i

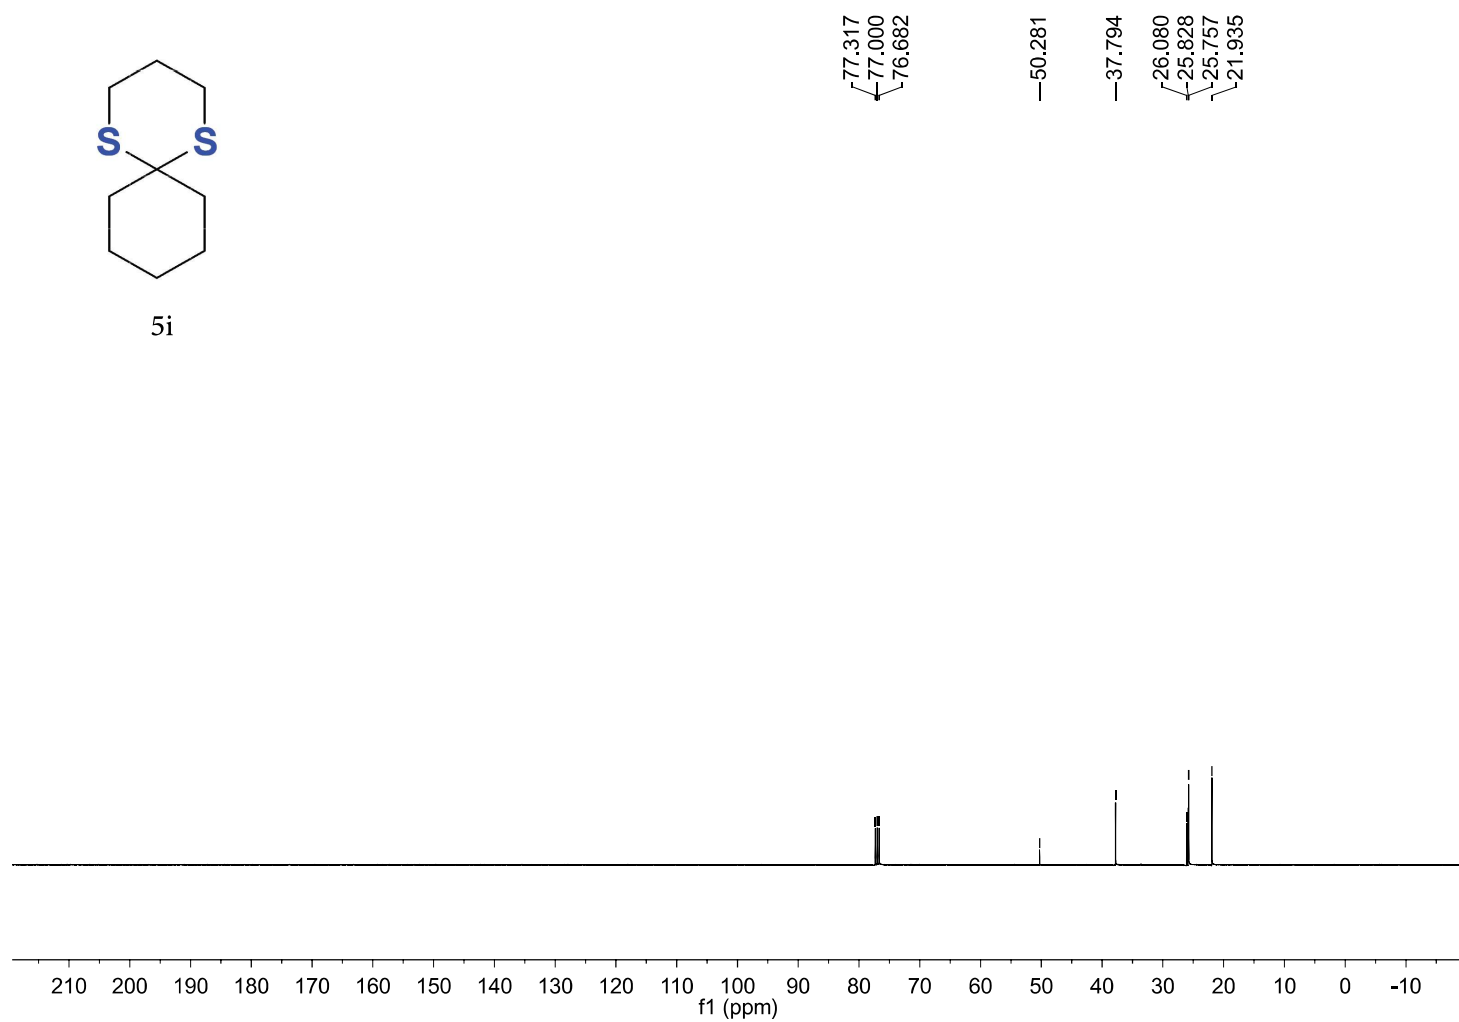

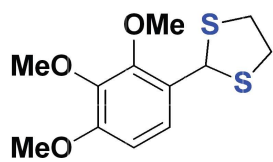

7a

7.432  
7.410  
7.267  
6.678  
6.656  
-6.000  
3.951  
3.860  
3.849  
3.493  
3.482  
3.468  
3.465  
3.462  
3.455  
3.450  
3.443  
3.437  
3.419  
3.369  
3.350  
3.344  
3.337  
3.333  
3.325  
3.322  
3.319  
3.305  
3.294  
-0.000

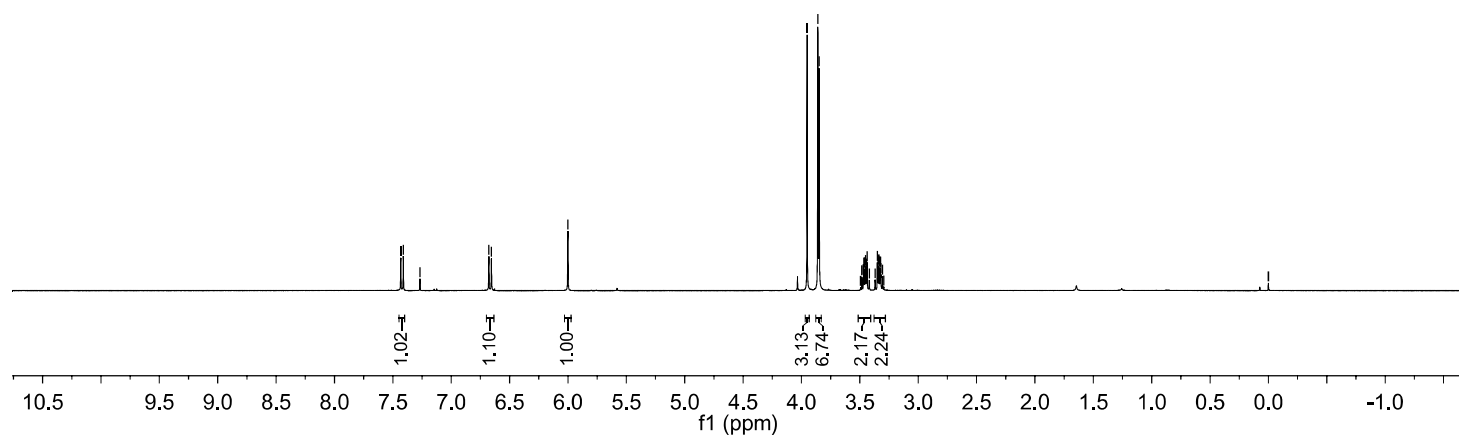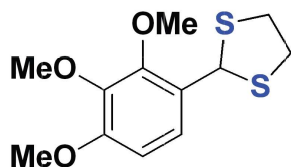

7a

153.225  
151.353  
141.748  
126.281  
122.832  
107.299  
77.318  
77.000  
76.683  
61.379  
60.703  
55.957  
49.162  
39.684

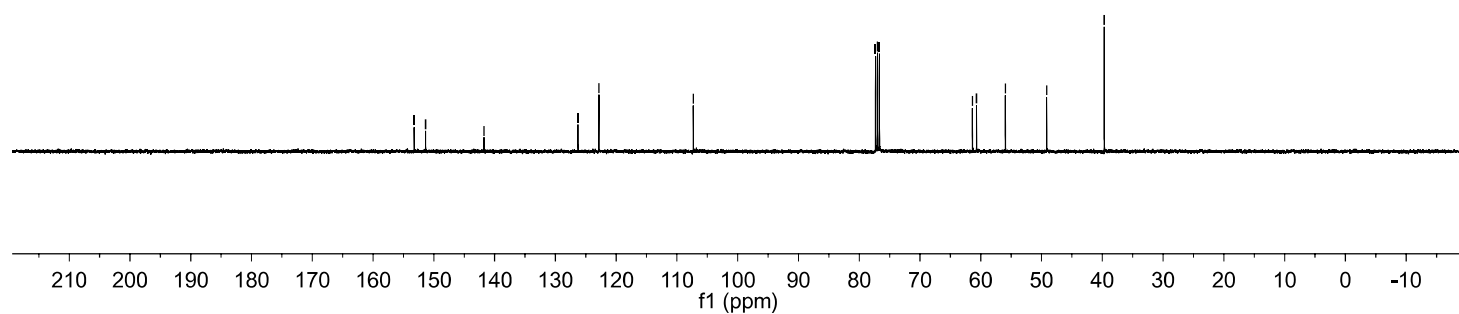

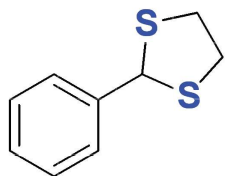

7b

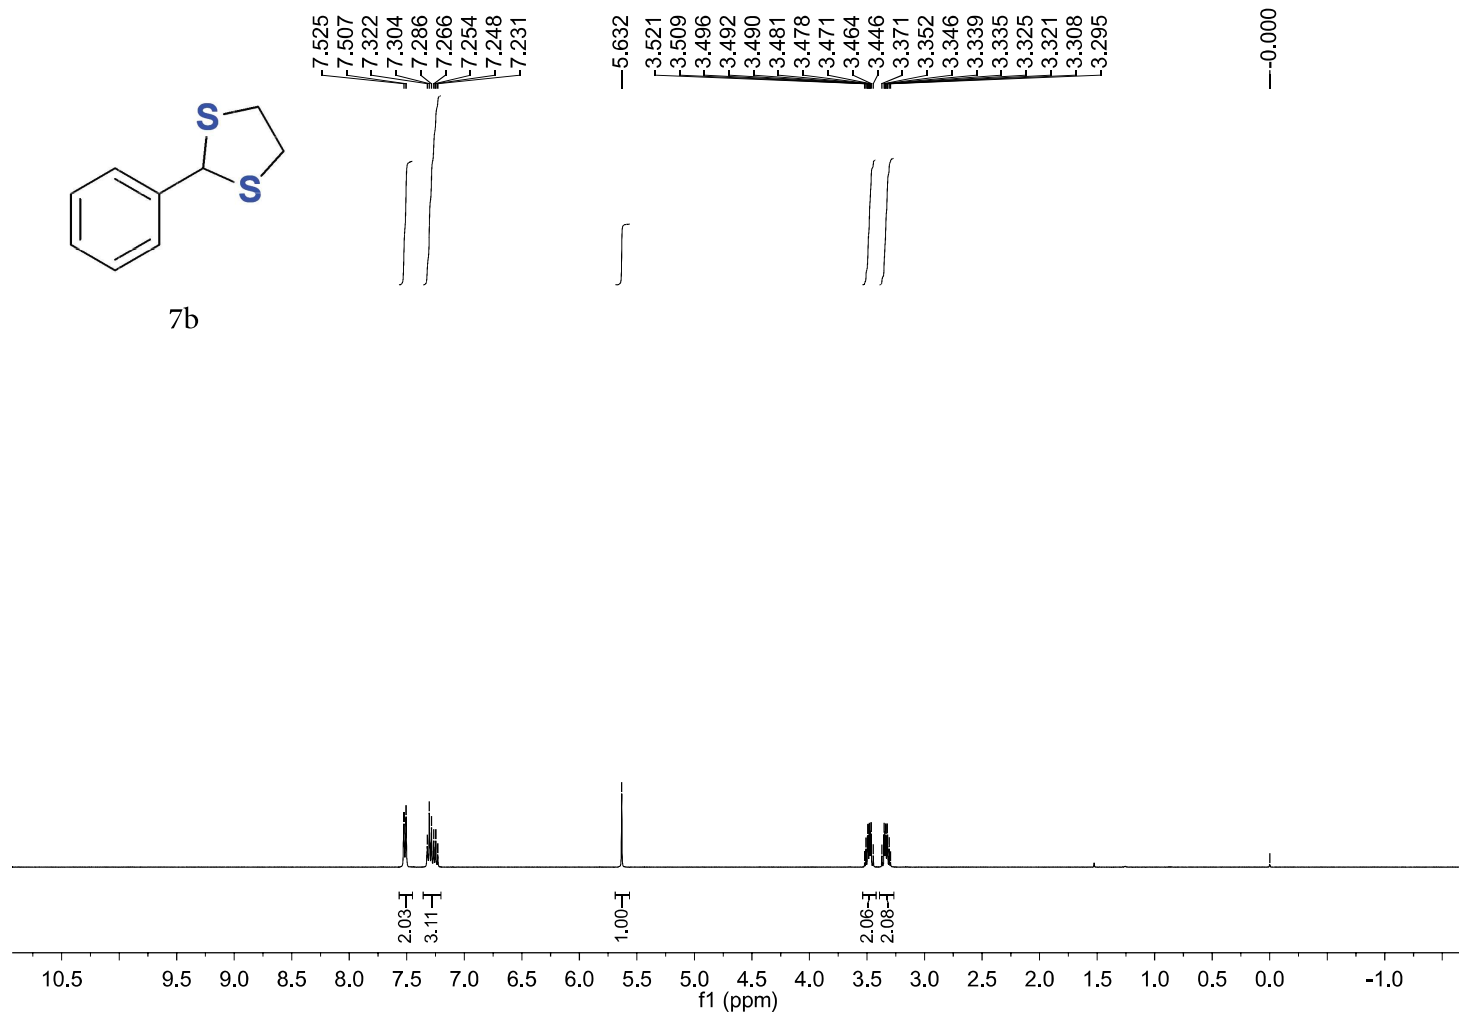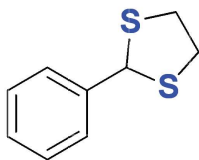

7b

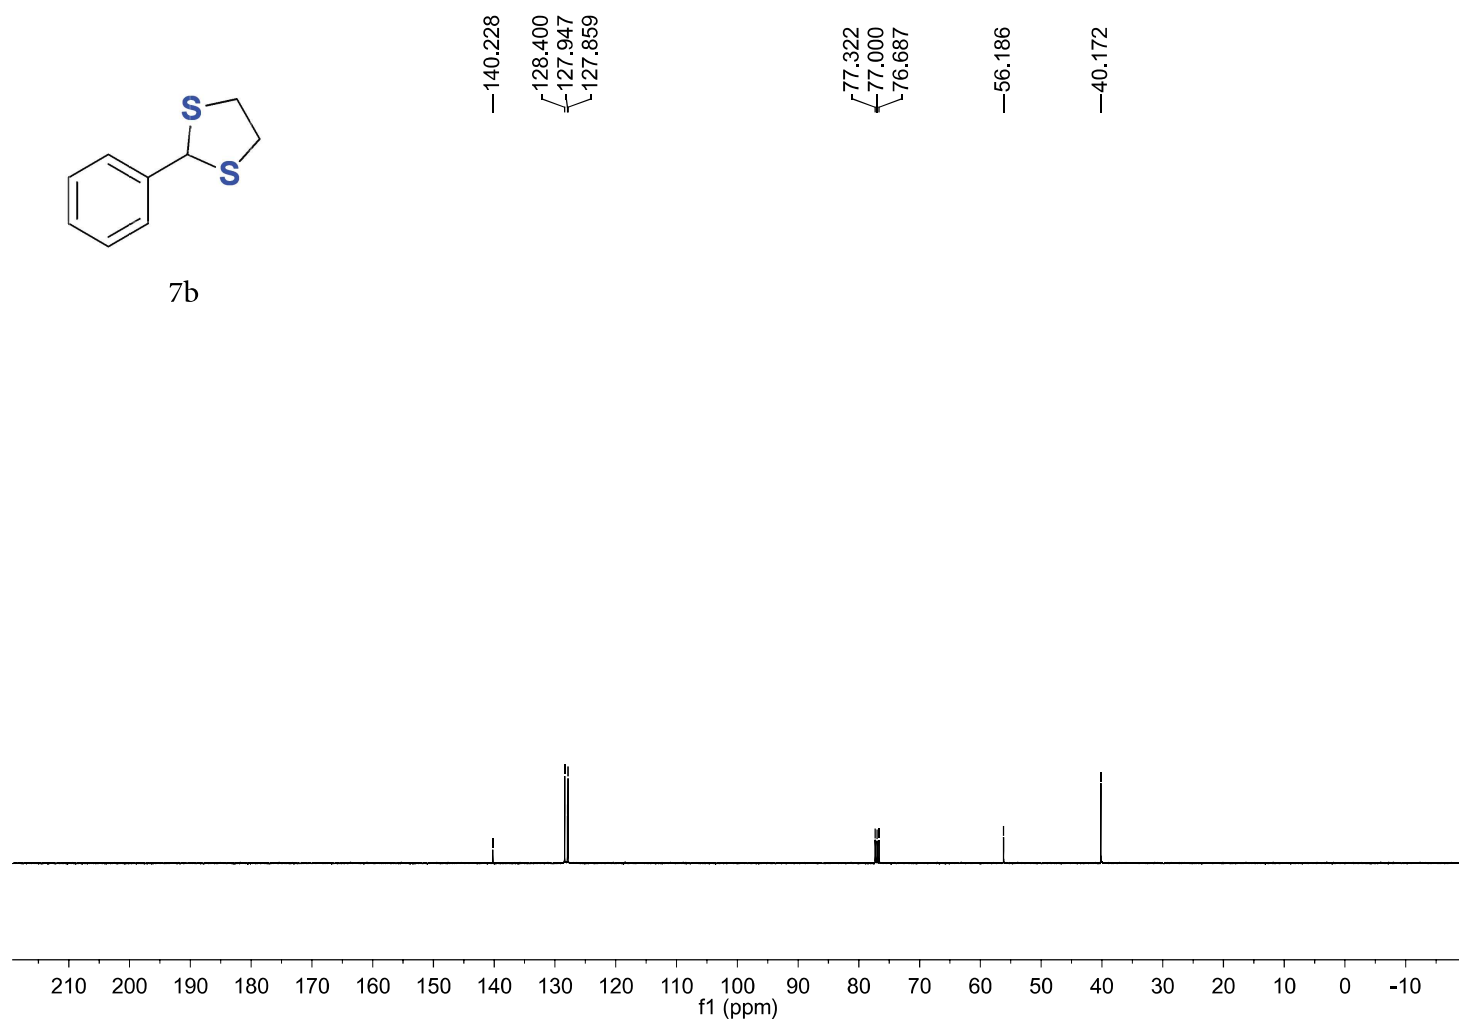

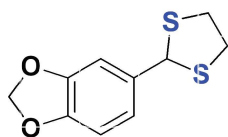

7c

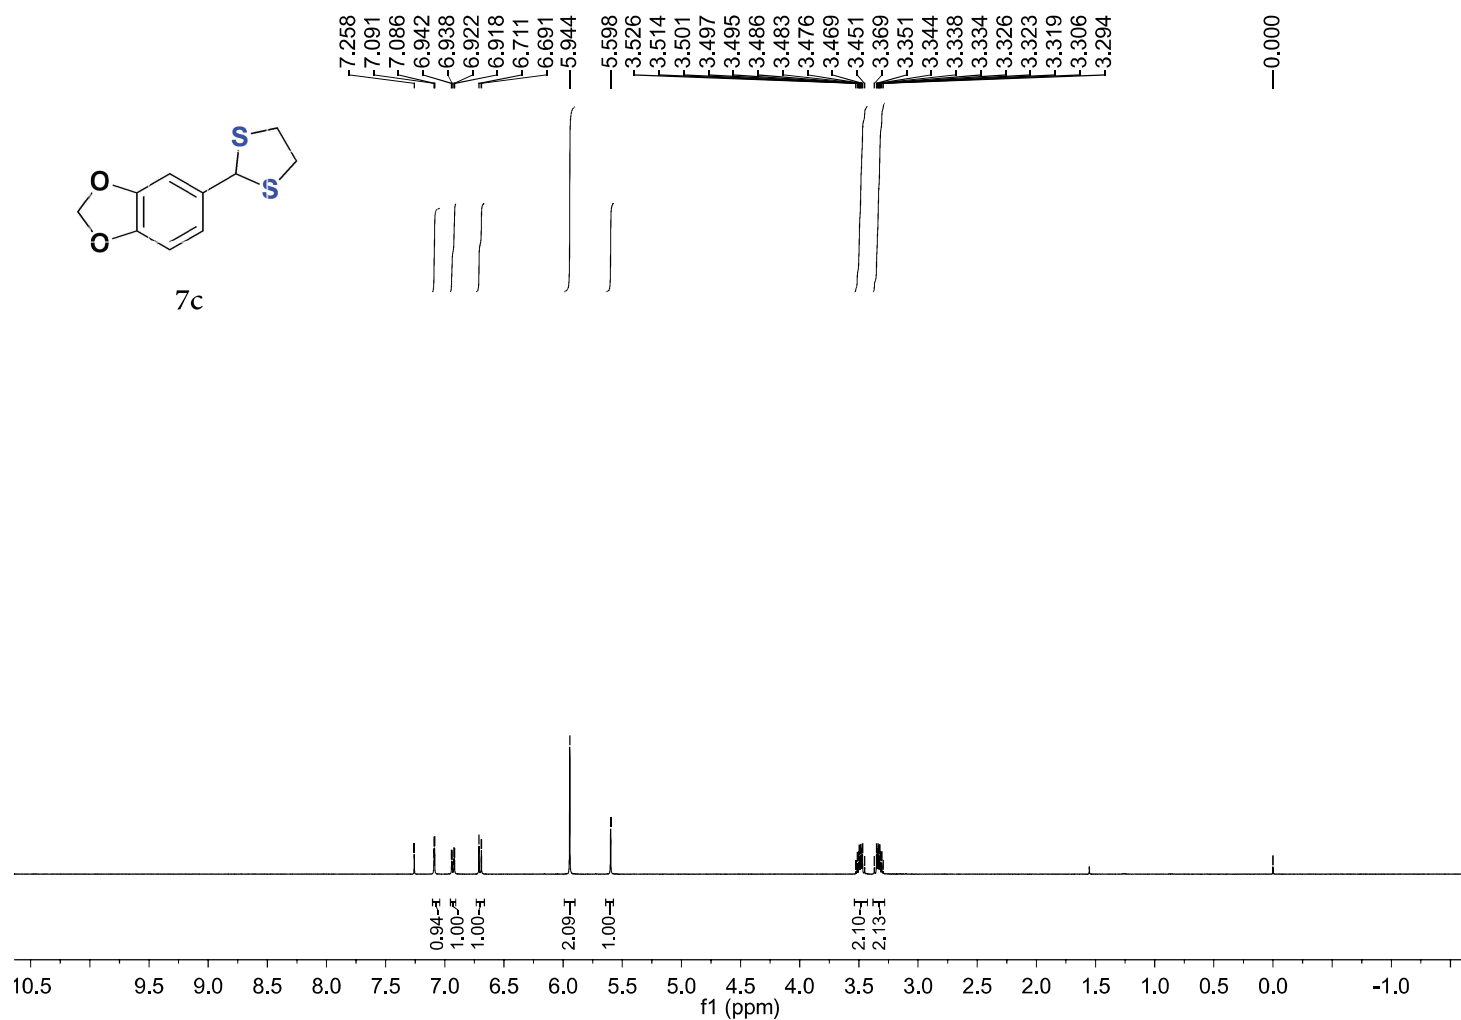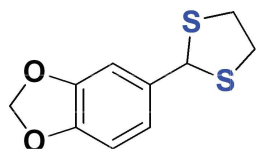

7c

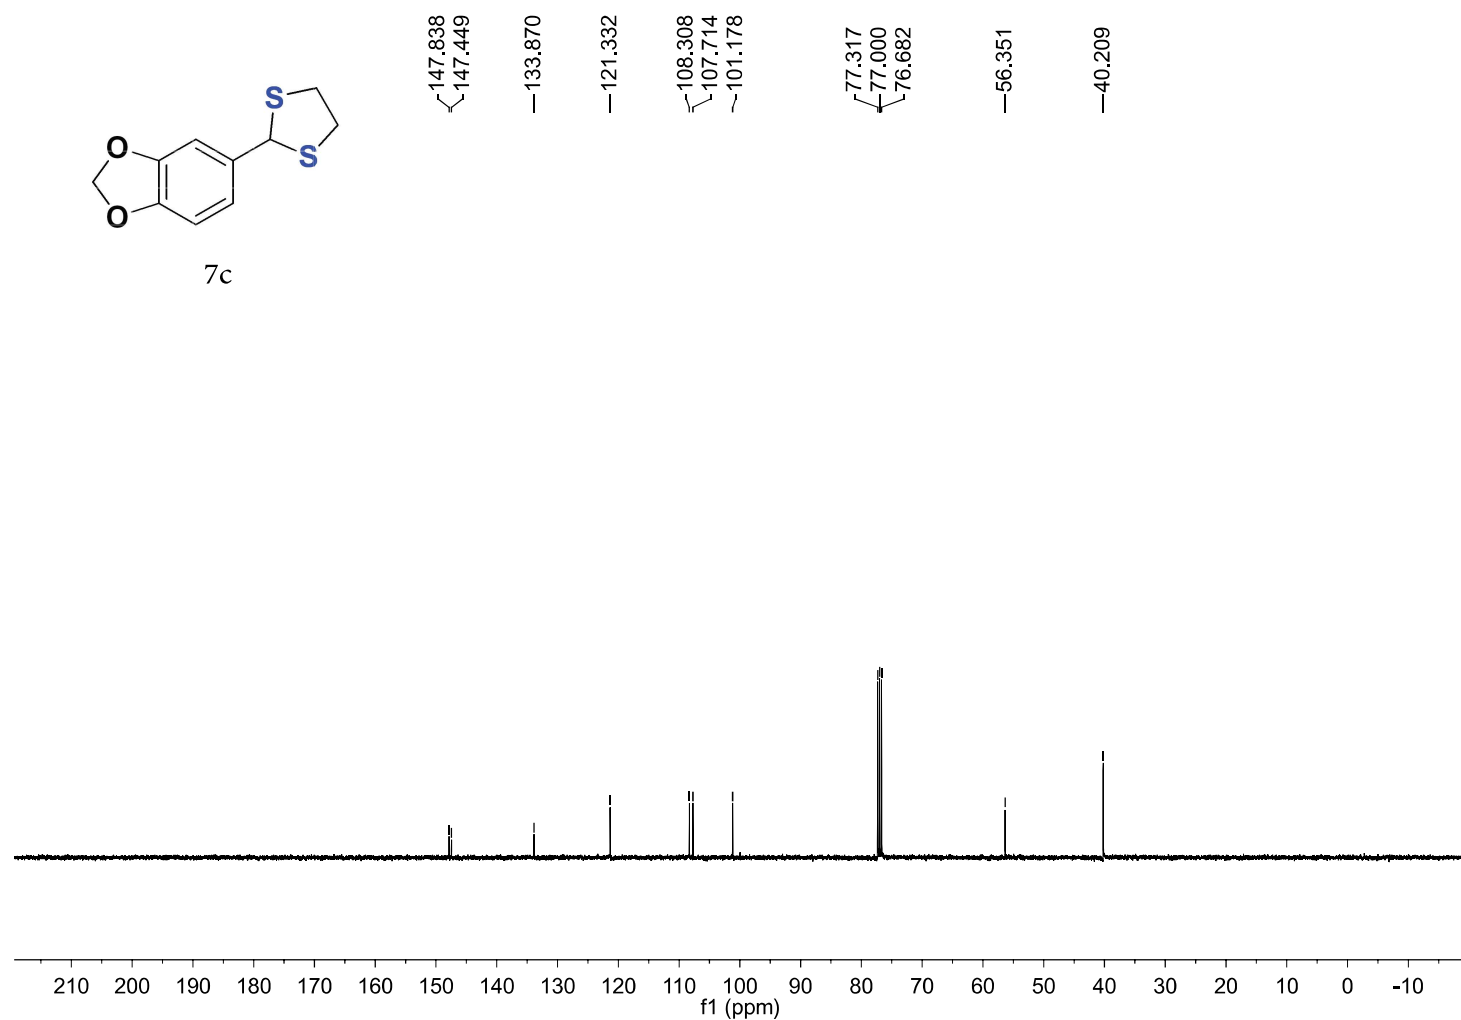



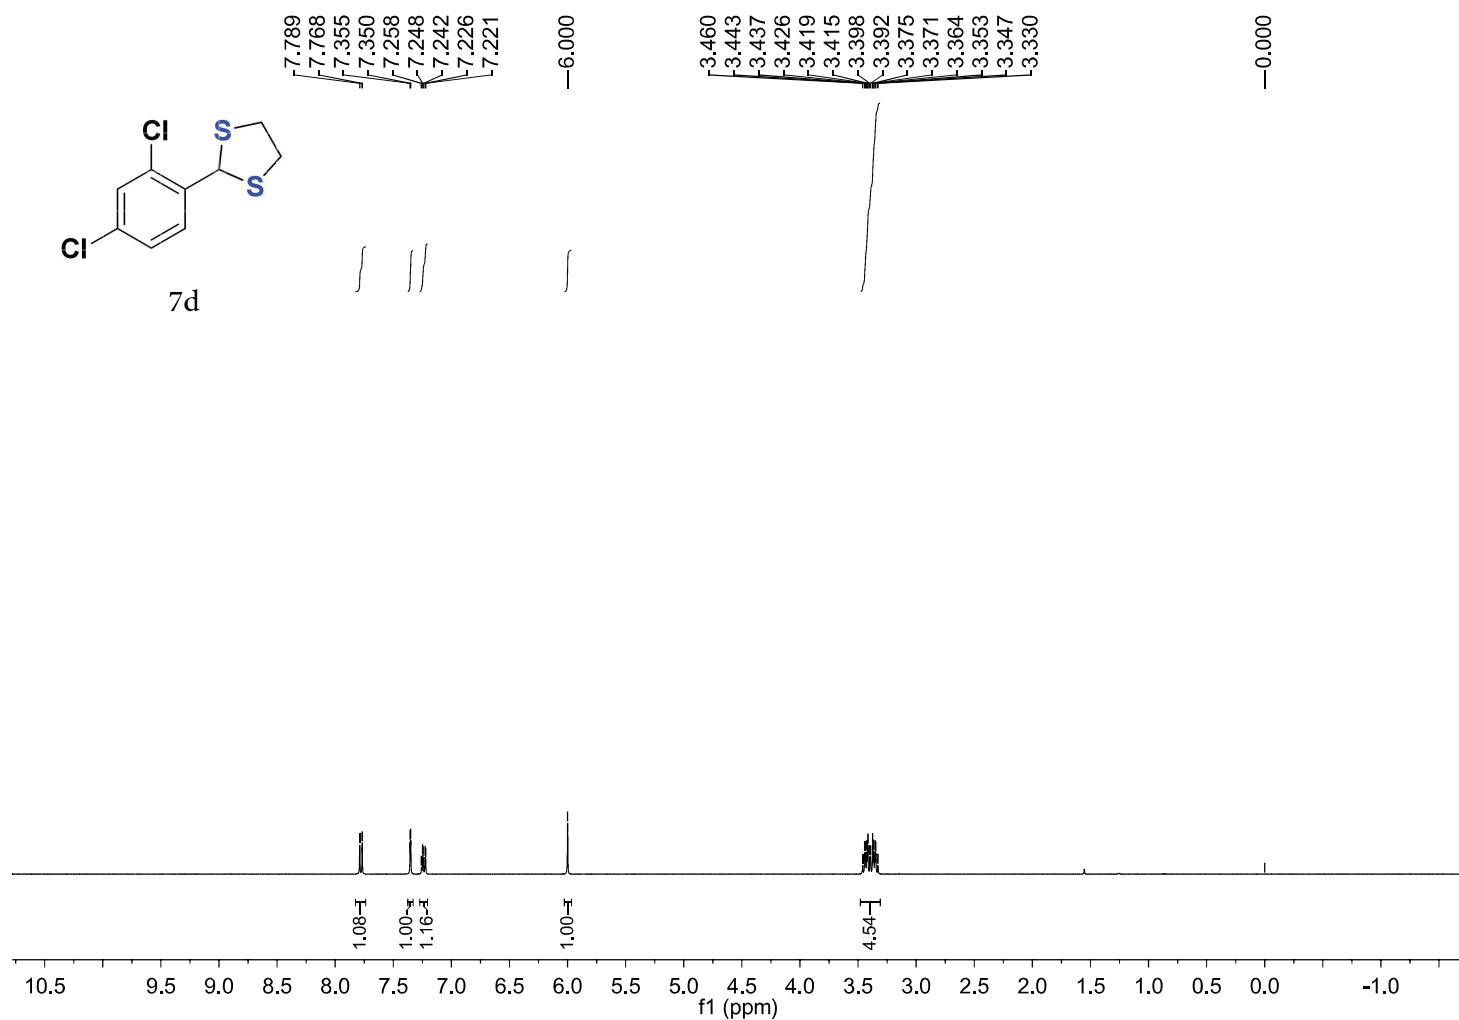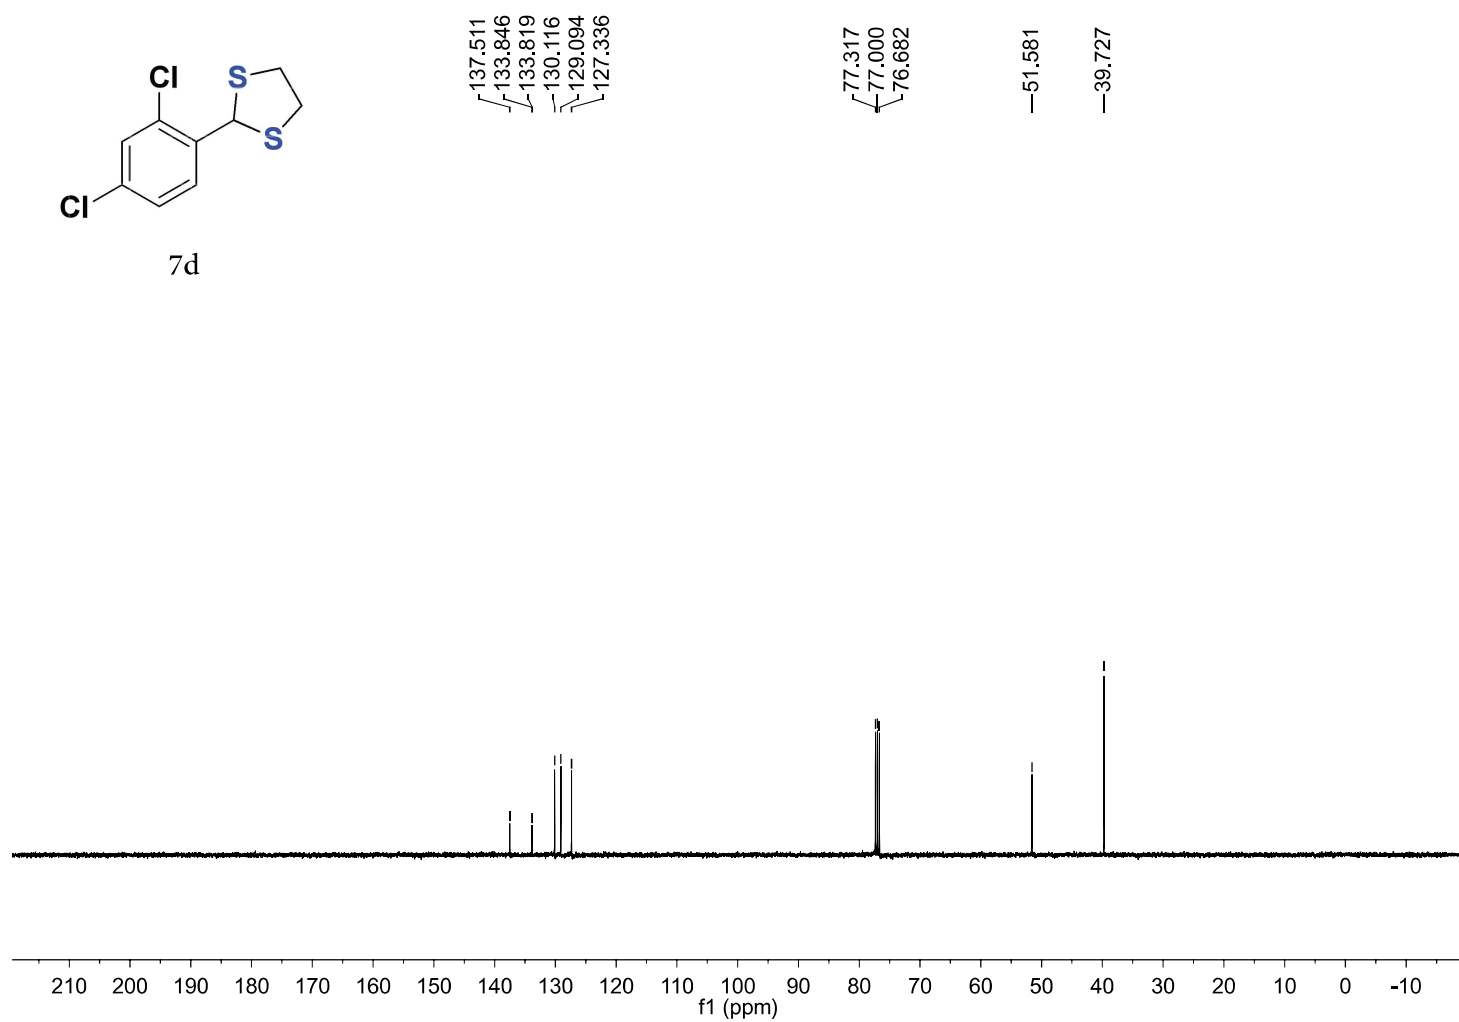

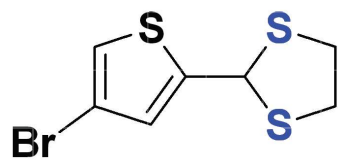

7e

7.259  
7.123  
7.119  
6.985  
6.984  
—5.808  
3.480  
3.471  
3.454  
3.450  
3.444  
3.438  
3.431  
3.426  
3.408  
3.378  
3.360  
3.355  
3.348  
3.342  
3.336  
3.332  
3.315  
3.306  
—0.000

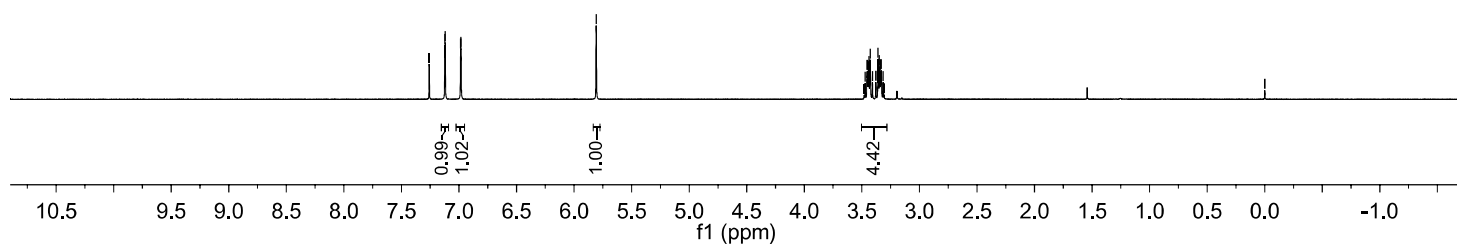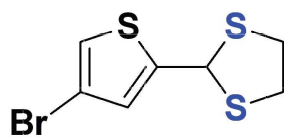

7e

—148.851  
—128.005  
—122.781  
—109.043  
77.317  
77.000  
76.682  
—50.087  
—39.775

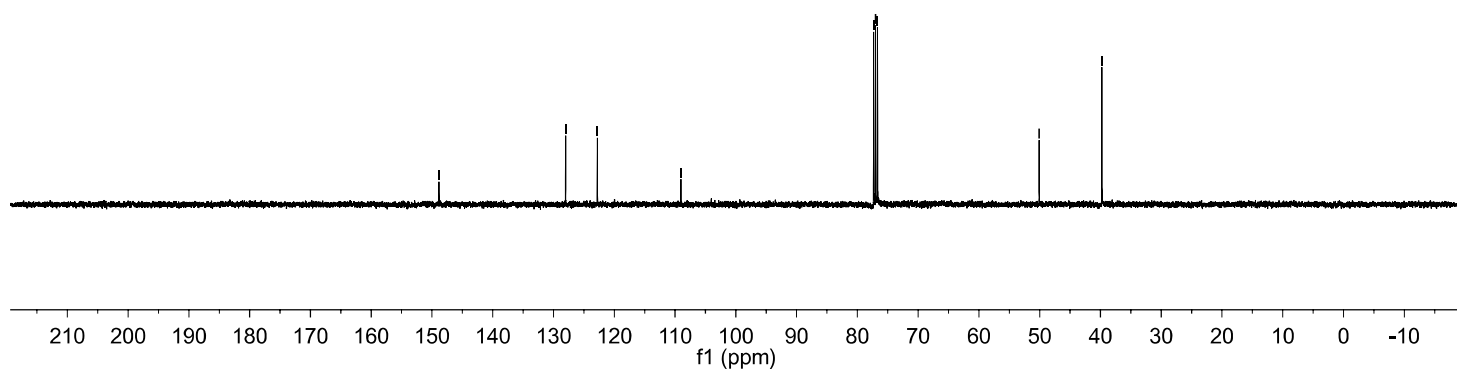

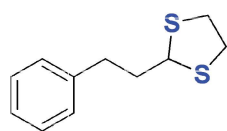

7f

7.304 7.284 7.266 7.257 7.203 7.191 7.183  
4.456 4.438 4.420  
3.254 3.251 3.237 3.222 3.219 2.776 2.758 2.756 2.140 2.125 2.121 2.102  
-0.000

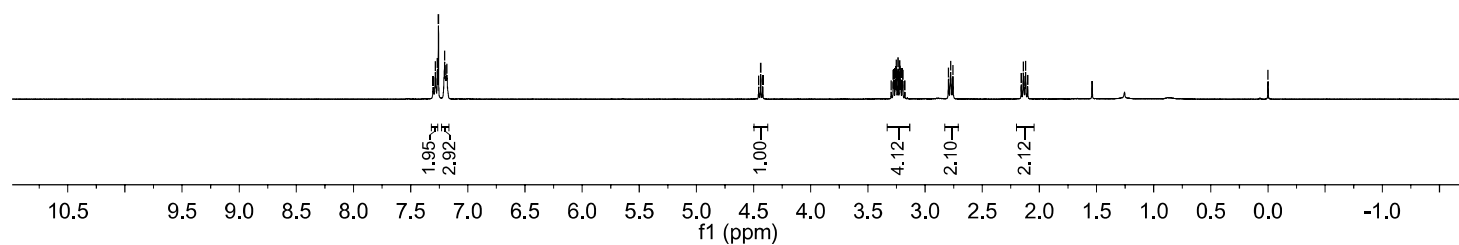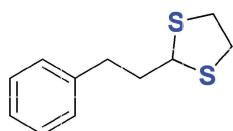

7f

140.841 128.510 128.428 126.031  
77.317 77.000 76.682  
52.814 41.057 38.397 35.241

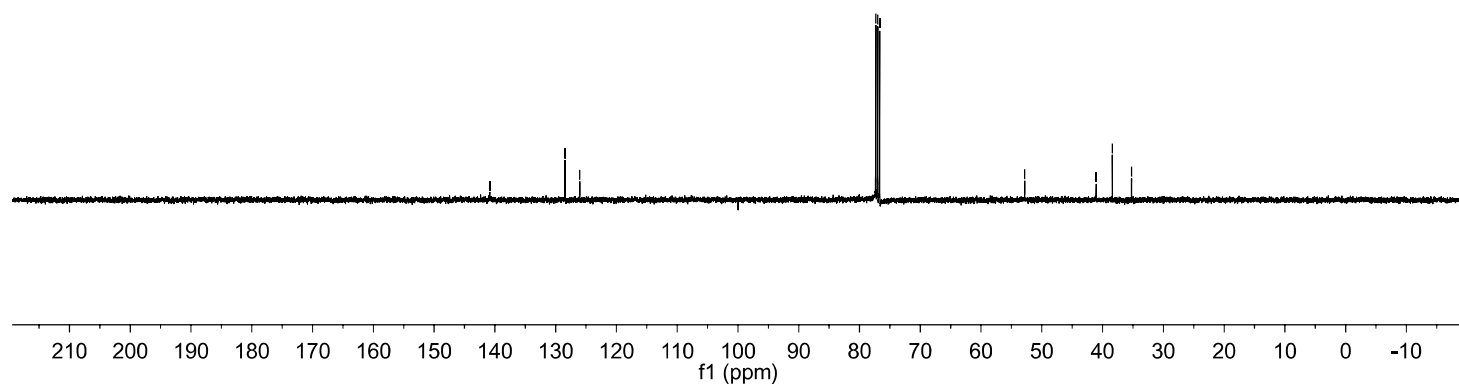

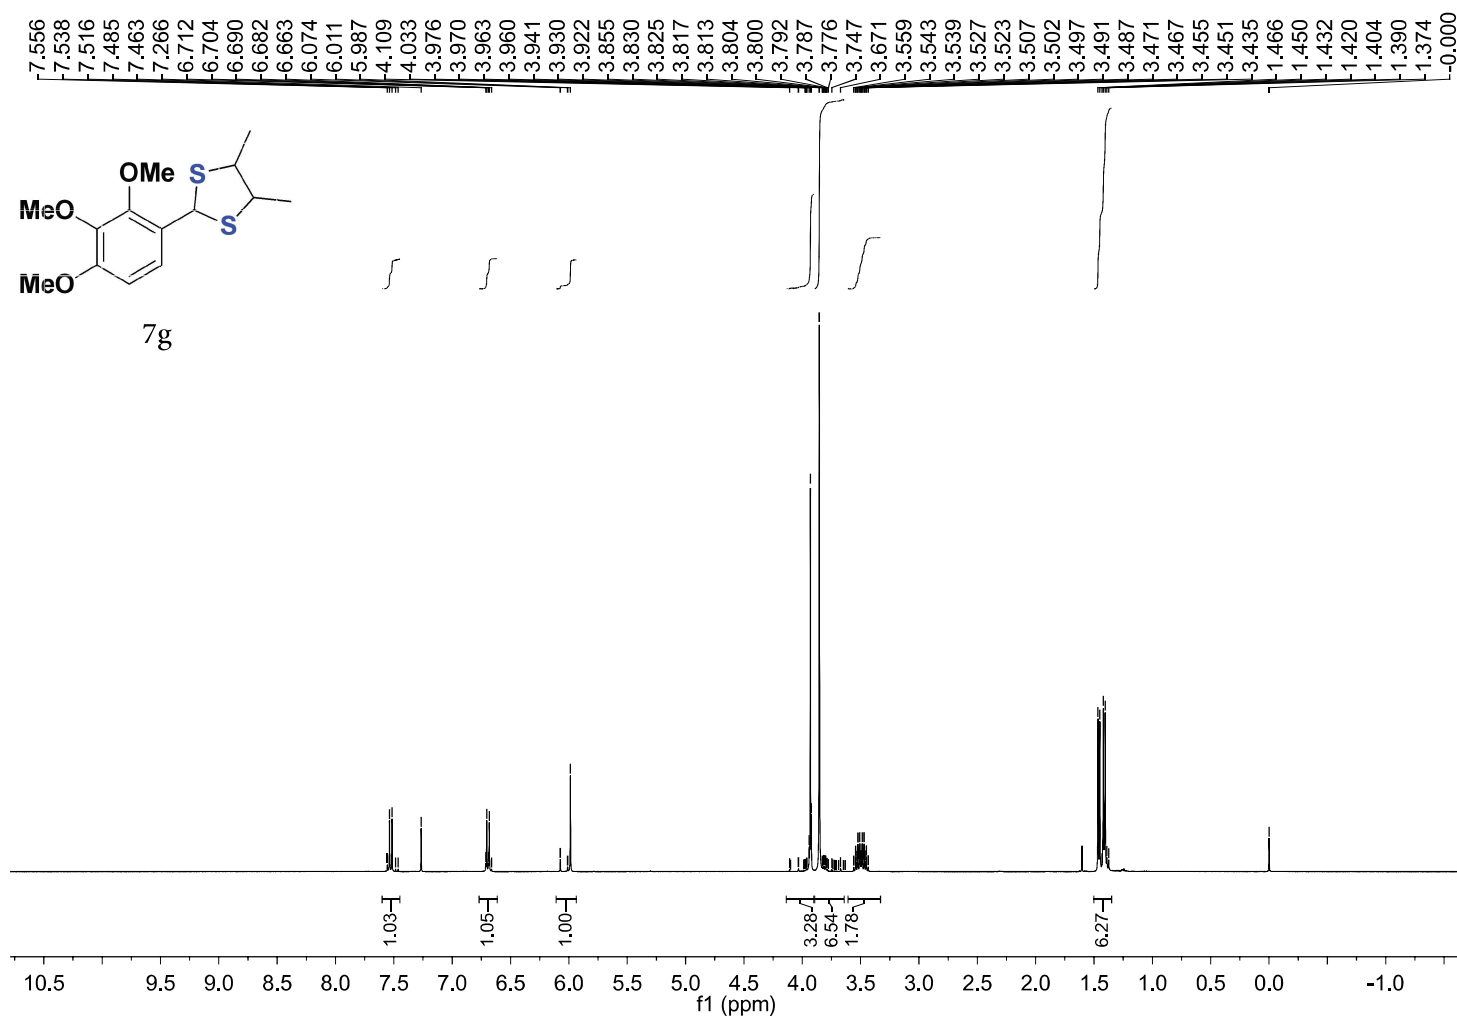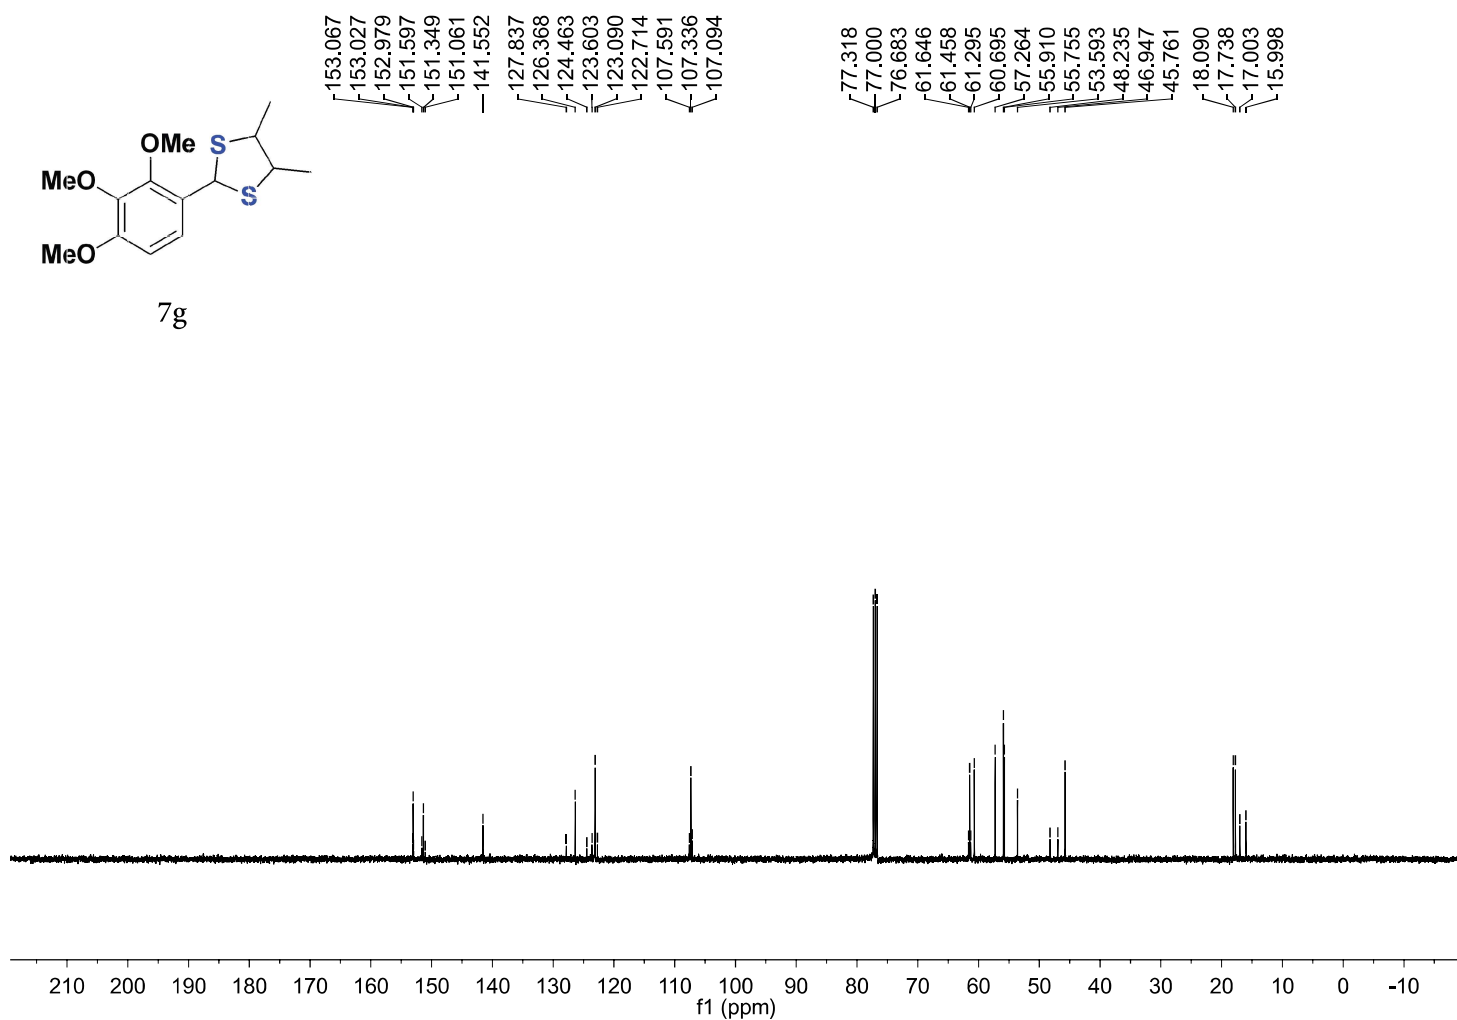

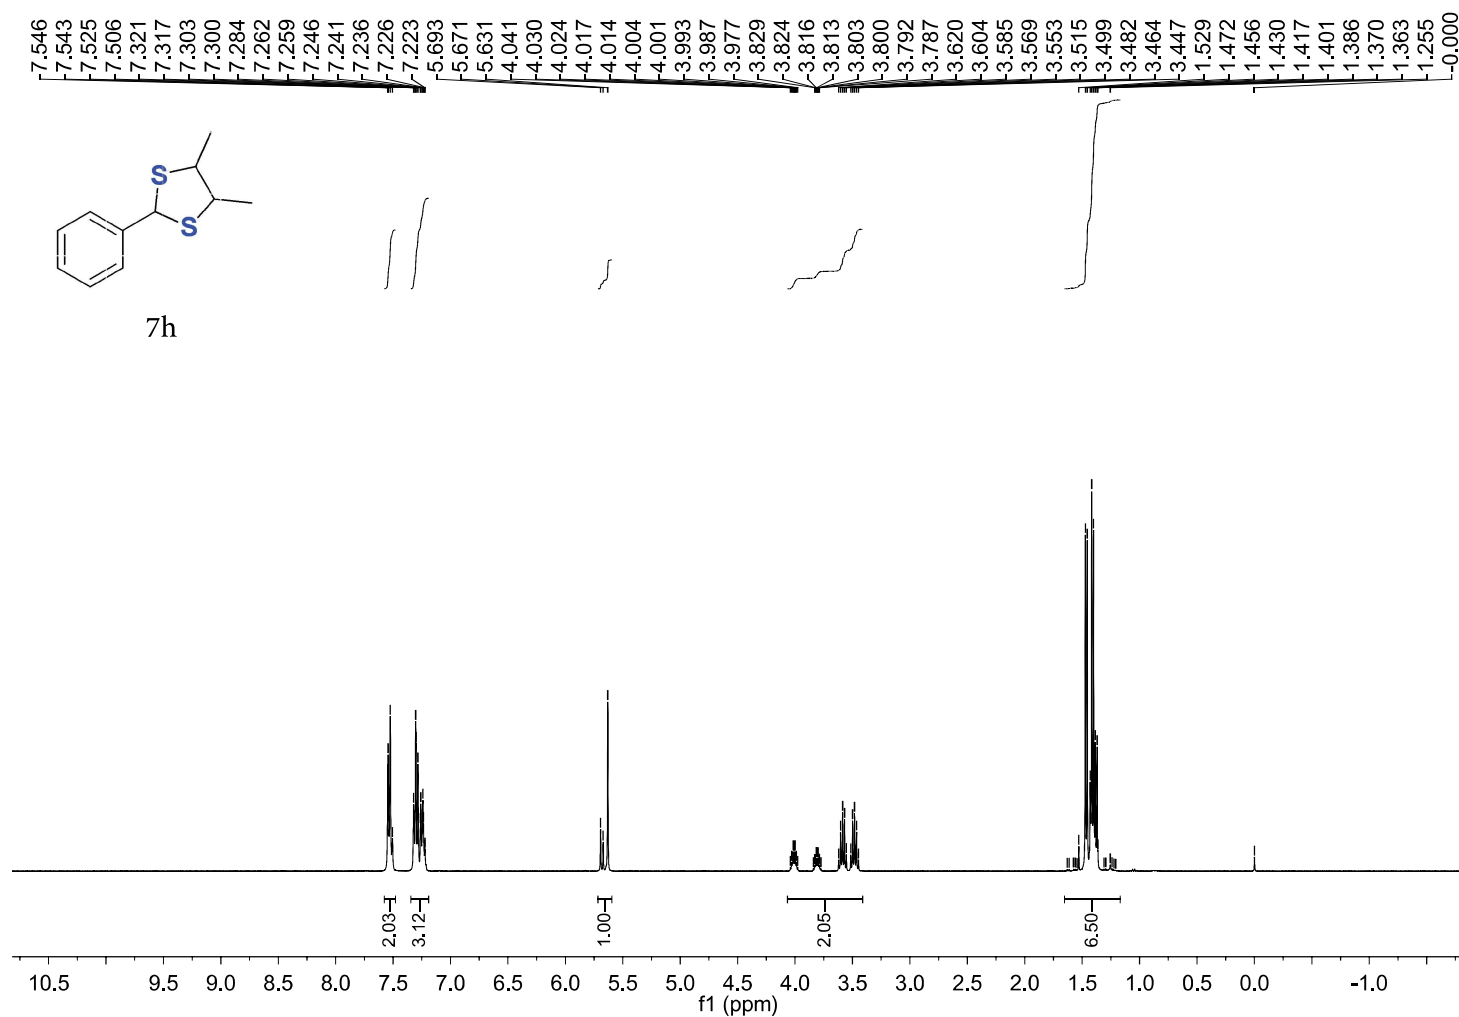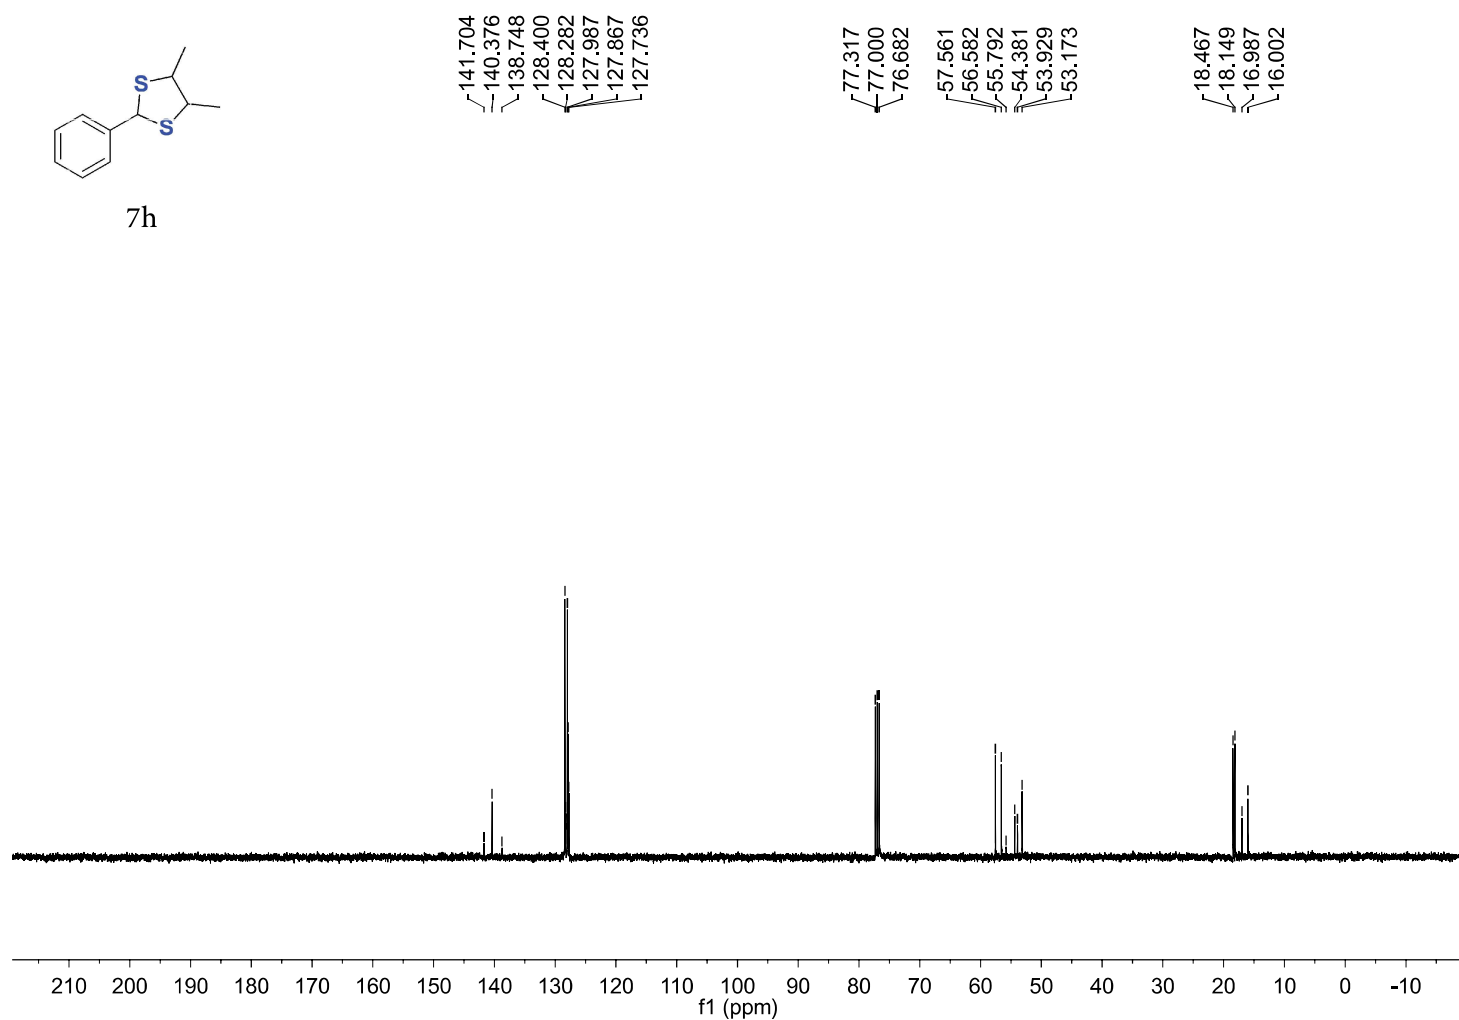

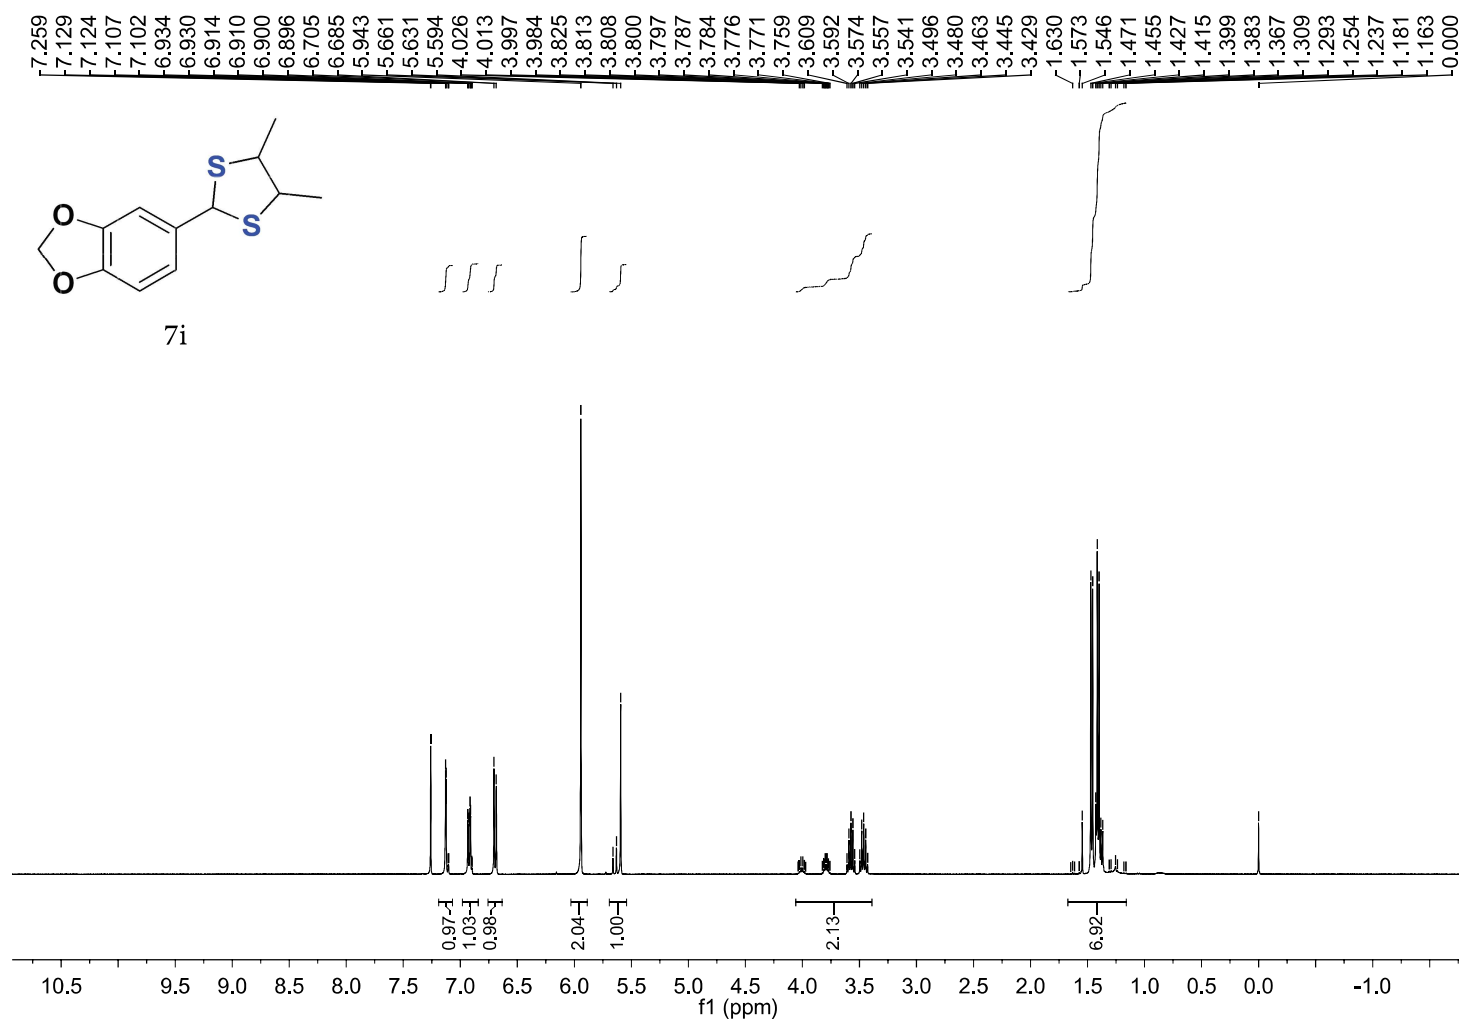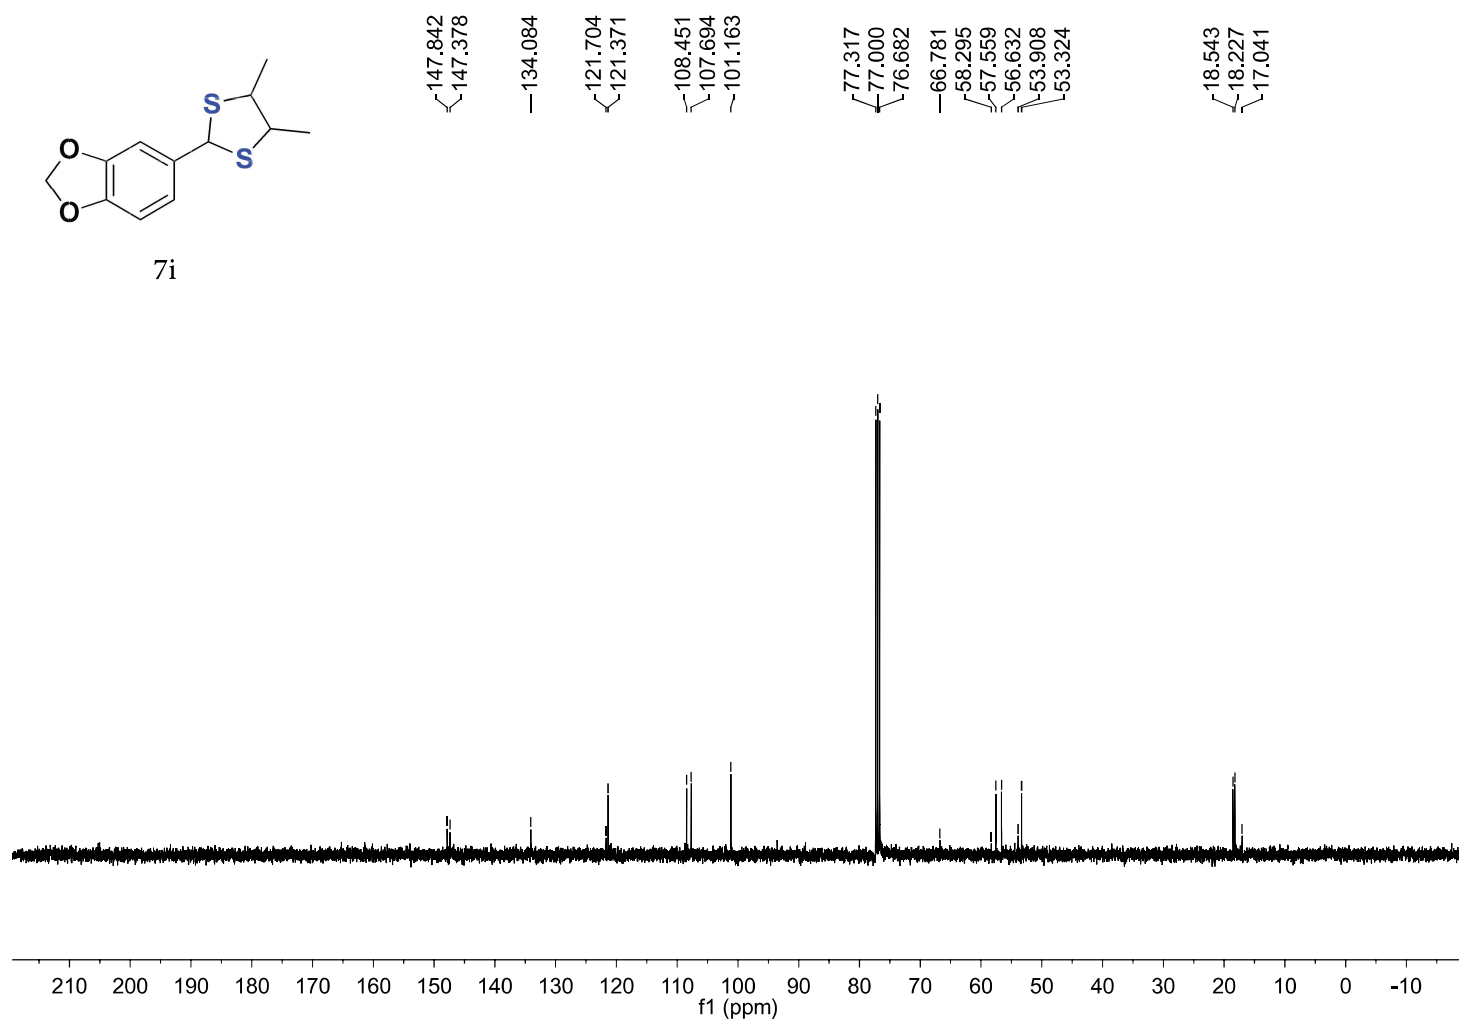

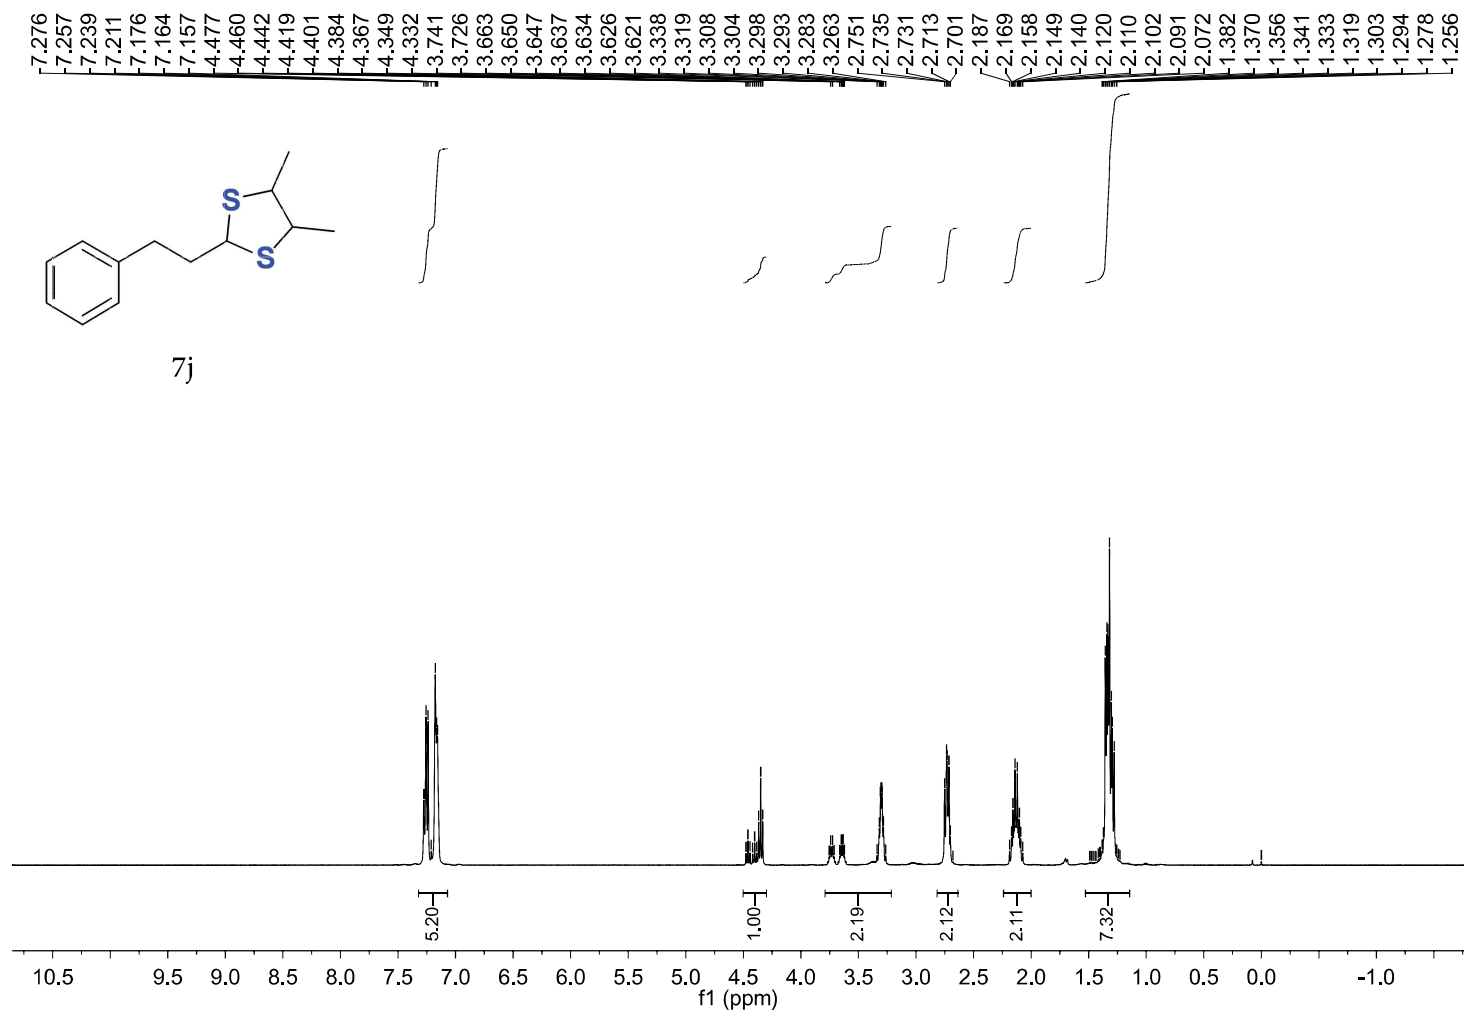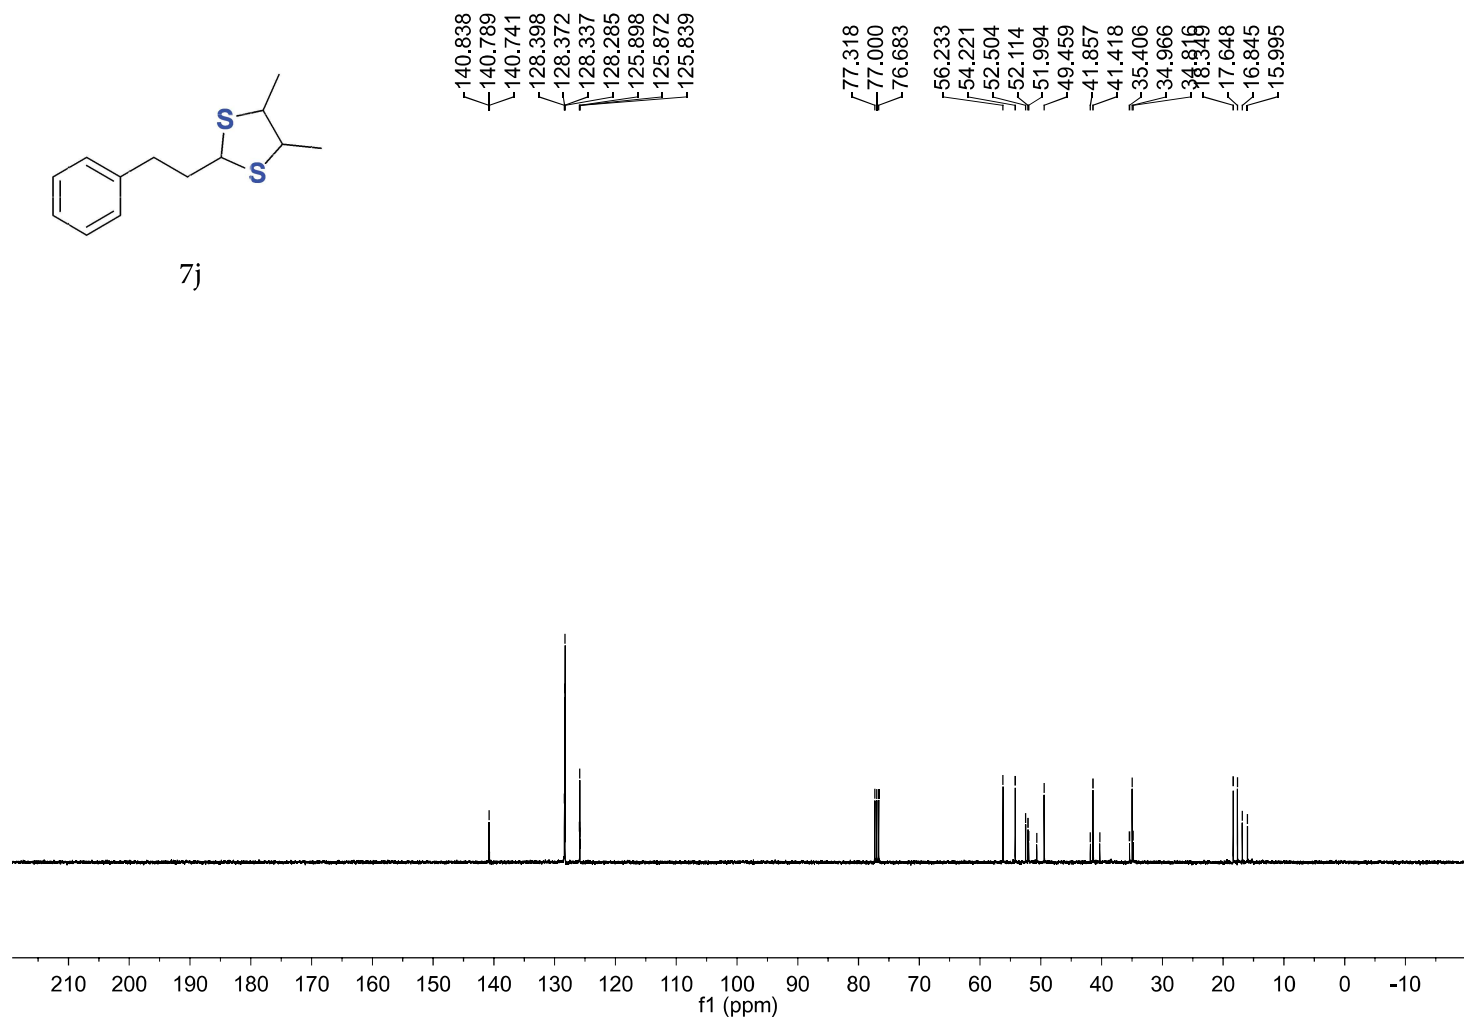

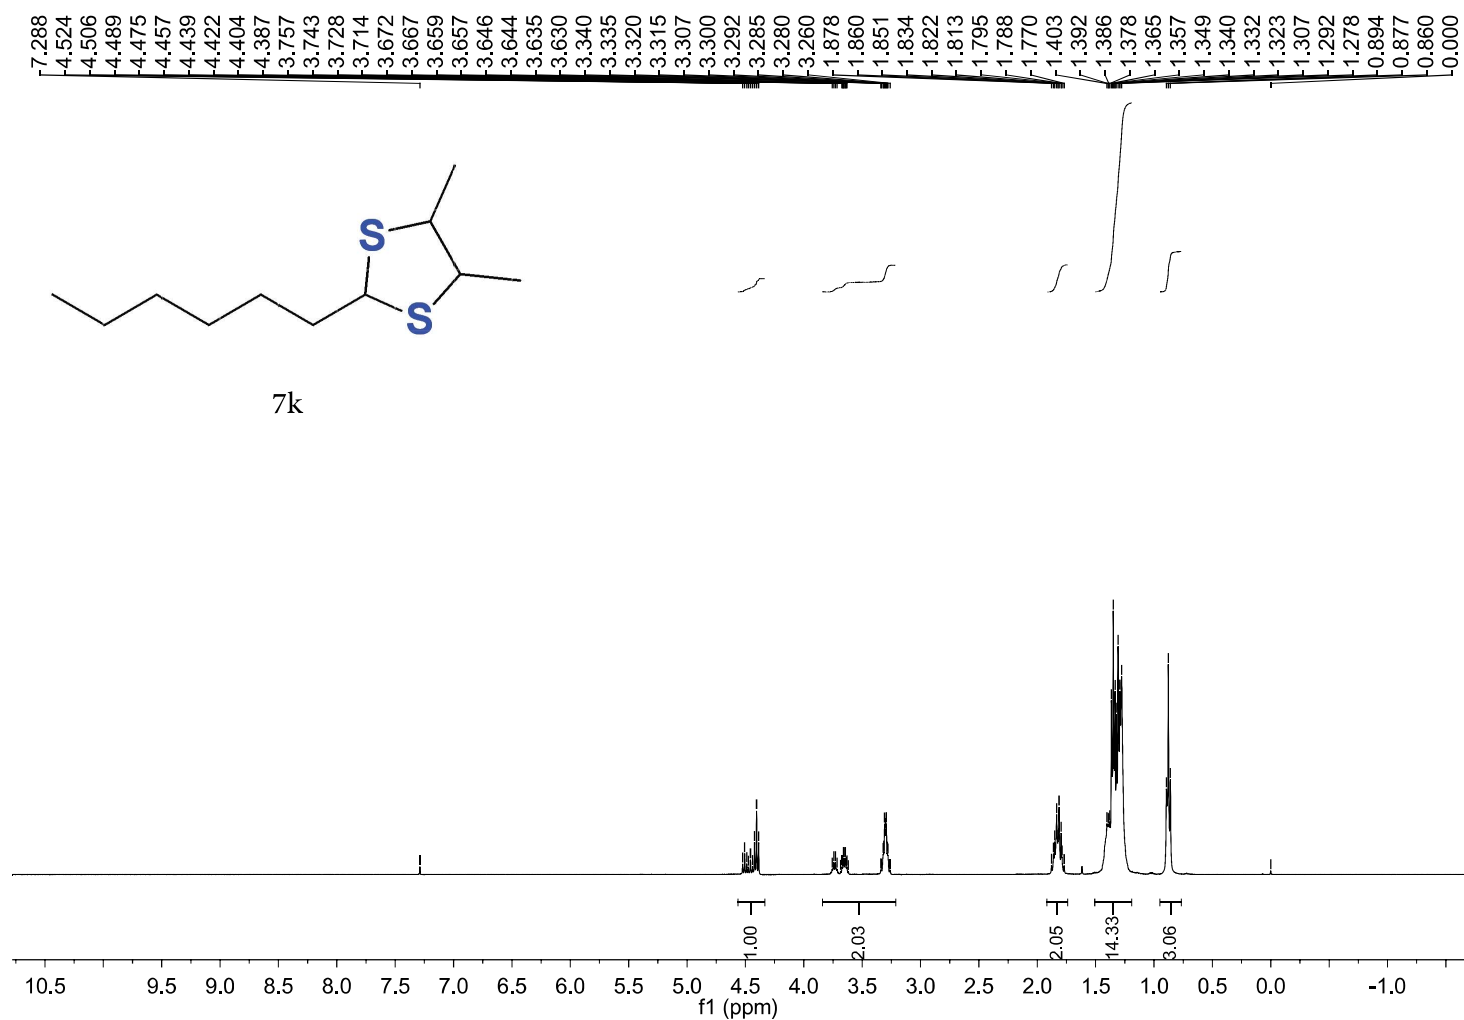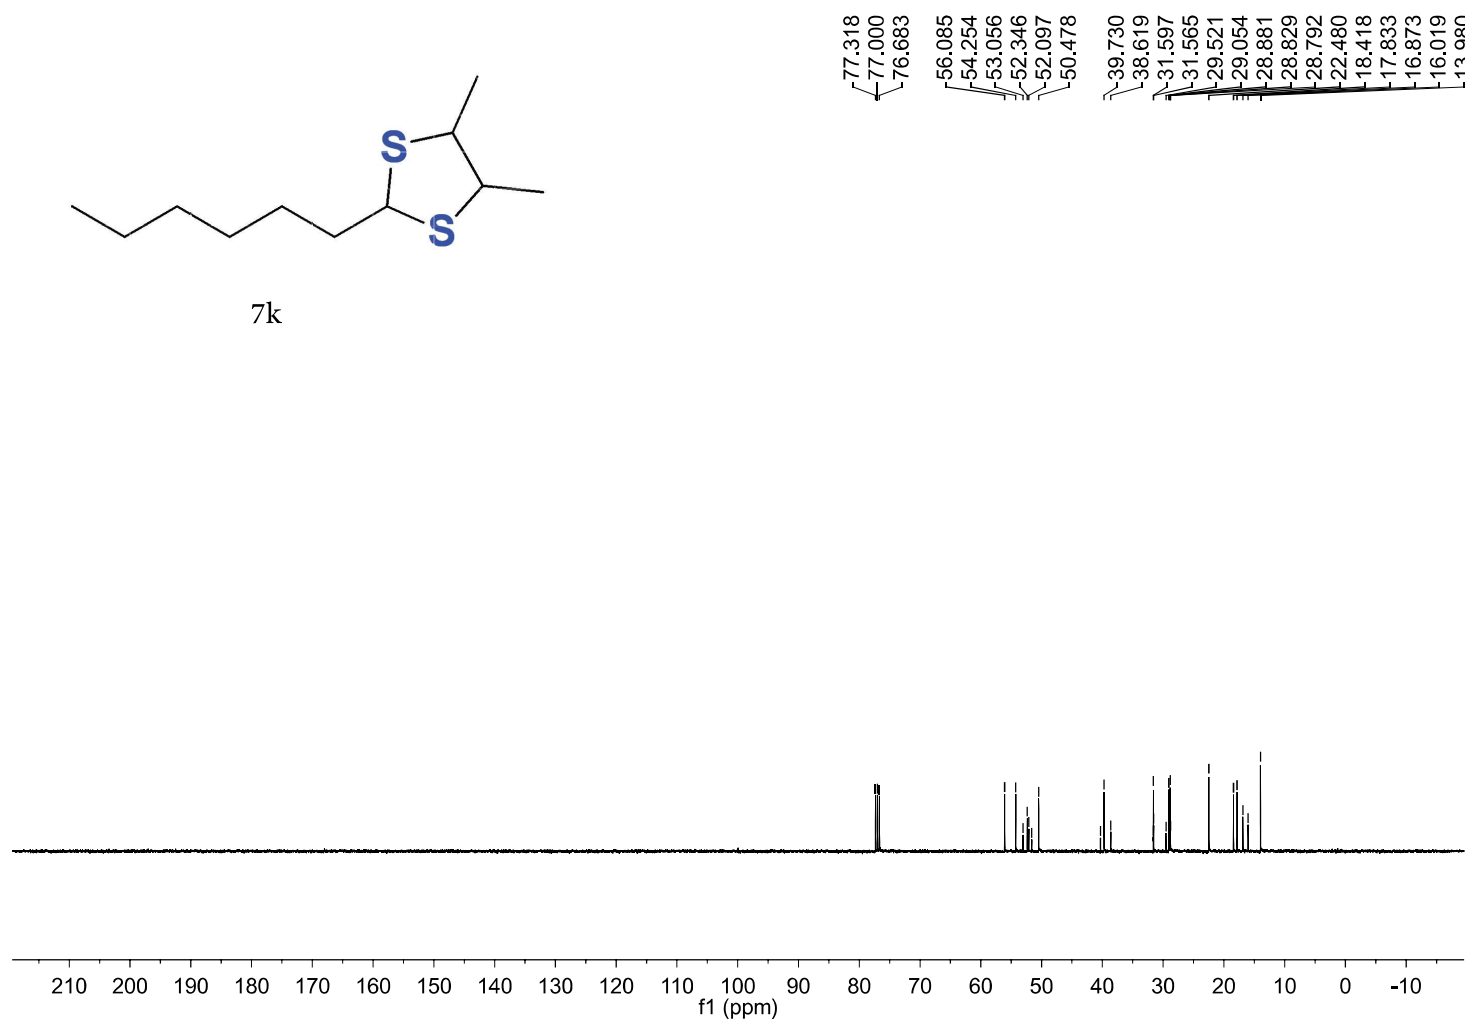

Supplement: c8gc02237b1.pdf [file c8gc02237b1.pdf]
